# Supplementary material for: Aryl iodine-catalysed divergent synthesis of isobenzofuranones and isocoumarins via oxidative 1,2-aryl migration/elimination
Source: Royal Society of Chemistry journal article supplement (doi:10.1039/d2cc03101a), 2022-01-01
Supplement: d2cc03101a1.pdf [file d2cc03101a1.pdf]

# Aryl Iodine Catalysed Divergent Synthesis of Isobenzofuranone and Isocoumarins via Oxidative 1,2-Aryl Migration/Elimination

Jiaxin He,<sup>a</sup> Jingran Zhang,<sup>a</sup> Xuemin Li,<sup>a</sup> Haofeng Shi<sup>a</sup> and Yunfei Du<sup>a\*</sup>

<sup>a</sup> *Tianjin Key Laboratory for Modern Drug Delivery & High-Efficiency, School of  
Pharmaceutical Science and Technology, Tianjin University, Tianjin 300072, China.*

Tel: +86-22-27406121; duyunfeier@tju.edu.cn

## Supporting Information

|            |                                                                                                                             |          |
|------------|-----------------------------------------------------------------------------------------------------------------------------|----------|
| <b>I</b>   | General Information                                                                                                         | S1       |
| <b>II</b>  | Experimental Procedures and Spectroscopic Data                                                                              | S2-S22   |
| <b>III</b> | References                                                                                                                  | S23      |
| <b>IV</b>  | <sup>1</sup> H and <sup>13</sup> C NMR Spectra of Compounds <b>2a-u</b> , <b>3a-l</b> , <b>5</b> , <b>6</b> and <b>HCIB</b> | S24-S95  |
| <b>V</b>   | X-ray Crystal Structure and Data of <b>HCIB</b>                                                                             | S96-S104 |

## I. General Information

$^1\text{H}$  and  $^{13}\text{C}$  NMR spectra were recorded on a 400 MHz or 600 MHz spectrometer at 25 °C. Chemical shifts values are given in ppm and referred as the internal standard to TMS: 0.00 ppm. Chemical shifts were expressed in parts per million ( $\delta$ ) downfield from the internal standard tetramethylsilane, and were reported as s (singlet), d (doublet), t (triplet), q (quadruple), dd (doublet of doublet), m (multiplet), etc. The coupling constants  $J$ , are reported in Hertz (Hz). High resolution mass spectrometry (HRMS) data were recorded on Q Exactive HF (Q Exactive<sup>TM</sup> HF/UtiMate<sup>TM</sup> 3000 RSLCnano) using electron spray ionization (ESI) in positive (or negative) mode. Melting points were determined with a Micromelting point apparatus. TLC plates were visualized by exposure to ultraviolet light.

Reagents and solvents were purchased as reagent grade and were used without further purification. All reactions were performed in standard glassware, heated at 70 °C for 3 h before used. The starting materials **1**<sup>[1]</sup> were prepared according to literature methods. Flash column chromatography was performed over silica gel (200-300 m) using a mixture of ethyl acetate (EtOAc) and petroleum ether (PE).

## II. Experimental Procedures and Spectroscopic Data

### 1. Table S1. Optimization study for the formation of 2a<sup>a</sup>

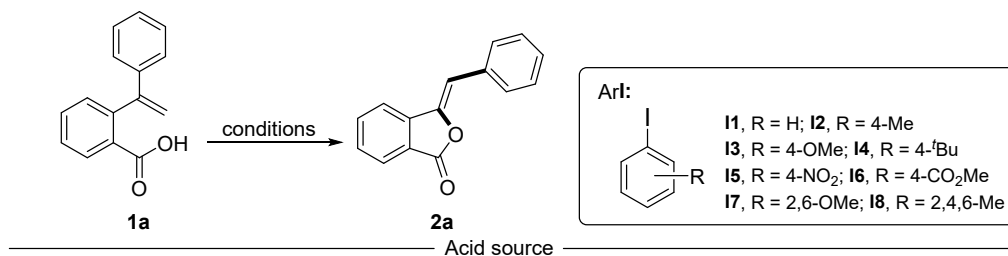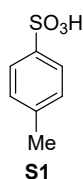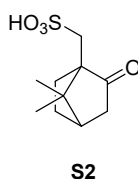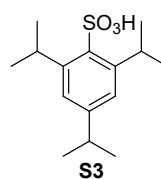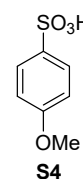

| Entry | Ar1 | Oxidant       | Solvent | Acid | Yield (%) <sup>b</sup> |
|-------|-----|---------------|---------|------|------------------------|
| 1     | I1  | <i>m</i> CPBA | DCM     | S1   | 35                     |
| 2     | I1  | <i>m</i> CPBA | EA      | S1   | trace                  |
| 3     | I1  | <i>m</i> CPBA | MeCN    | S1   | 0                      |
| 4     | I1  | <i>m</i> CPBA | HFIP    | S1   | 23                     |
| 5     | I1  | <i>m</i> CPBA | toluene | S1   | 0                      |
| 6     | I1  | <i>m</i> CPBA | DCE     | S1   | 43                     |
| 7     | I1  | <i>m</i> CPBA | THF     | S1   | 0                      |
| 8     | I1  | <i>m</i> CPBA | TFE     | S1   | 37                     |
| 9     | I1  | <i>m</i> CPBA | DMF     | S1   | 0                      |
| 10    | I1  | <i>m</i> CPBA | MeOH    | S1   | 0                      |
| 11    | I2  | <i>m</i> CPBA | DCE     | S1   | 65                     |
| 12    | I3  | <i>m</i> CPBA | DCE     | S1   | 43                     |
| 13    | I4  | <i>m</i> CPBA | DCE     | S1   | 70                     |
| 14    | I5  | <i>m</i> CPBA | DCE     | S1   | trace                  |
| 15    | I6  | <i>m</i> CPBA | DCE     | S1   | trace                  |
| 16    | I7  | <i>m</i> CPBA | DCE     | S1   | 59                     |
| 17    | I8  | <i>m</i> CPBA | DCE     | S1   | 62                     |
| 18    | I4  | selectfluor   | DCE     | S1   | trace                  |

|                       |           |                               |            |           |           |
|-----------------------|-----------|-------------------------------|------------|-----------|-----------|
| 19                    | I4        | H <sub>2</sub> O <sub>2</sub> | MeCN       | S1        | NR        |
| 20                    | I4        | TBHP                          | MeCN       | S1        | NR        |
| 21 <sup>c</sup>       | I4        | <i>m</i> CPBA                 | DCE        | S1        | 77        |
| <b>22<sup>c</sup></b> | <b>I4</b> | <b><i>m</i>CPBA</b>           | <b>DCE</b> | <b>S2</b> | <b>82</b> |
| 23 <sup>c</sup>       | I4        | <i>m</i> CPBA                 | DCE        | S3        | 72        |
| 24 <sup>c</sup>       | I4        | <i>m</i> CPBA                 | DCE        | S4        | 80        |

<sup>a</sup> Unless otherwise indicated, the reaction of **1a** (0.5 mmol) was carried out at rt for 2-12 h in solvent (5.0 mL) in the presence of ArI (20 mol%), *m*CPBA (1.2 equiv), and acid (1.0 equiv). <sup>b</sup> Isolated yield. NR = no reaction. <sup>c</sup> 4 Å molecular sieves (0.1 g) were added.

The initial investigation was carried out using iodobenzene (20 mol%) as catalyst and *meta*-chloroperoxybenzoic acid (*m*CPBA) as the oxidant in the presence of *para*-toluenesulfonic acid (*p*-TsOH) in DCM at room temperature. To our delight, the transformation indeed took place, and the desired product **2a** was obtained in 35% yield (Table S1, entry 1). With the acceptable result in hand, we came to further optimize the reaction conditions. First, a detailed screening of solvent was carried out, the result indicated dichloroethane (DCE) was the most appropriate solvent for this transformation and gave the product **2a** in moderate yield (Table S1, entries 6). Second, a series of aryl iodide catalysts were screened (Table S1, entries 11-17). It was found when 4-iodotoluene **I2** was applied, the yield of product **2a** could be raised to 65% (Table S1, entry 11). This result might indicate that the electron-donating group on the benzene ring was beneficial for this transformation. Gratifyingly, the presence of an electron-donating group with large steric hindrance (**I4**) further afforded the desired product with a satisfying 70% yield (Table S1, entry 13). On the contrary, when the aryl iodine with an electron-withdrawing substituting groups (-NO<sub>2</sub>, -CO<sub>2</sub>Me) were applied, the transformation was greatly inhibited. Next, the other oxidants including selectfluor, H<sub>2</sub>O<sub>2</sub> and TBHP were investigated. Regrettably, none of them was capable of promoting the transformation (Table S1, entries 18-20). Whereas better yields were afforded with the addition of 4 Å molecular sieves (Table S1, entry 21), which prevented water

as the nucleophile and promoted yield to 77%. Furthermore, the sulfonic acid with different substituents and stereoscopic structures were tested (Table S1, entries 22-24). Notably, the optimum yield was obtained when ( $\pm$ )-10-camphorsulfonic acid (CSA) was applied to this reaction (Table S1, entry 22). Based on the above results, the optimal conditions for this transformation were finalized to be **I4** (20 mol%), *m*CPBA (1.2 equiv), CSA (1.0 equiv) and 4 Å molecular sieves in DCE at room temperature.

## 2. Typical Synthetic Procedure A and Spectroscopic Data of 2a-u

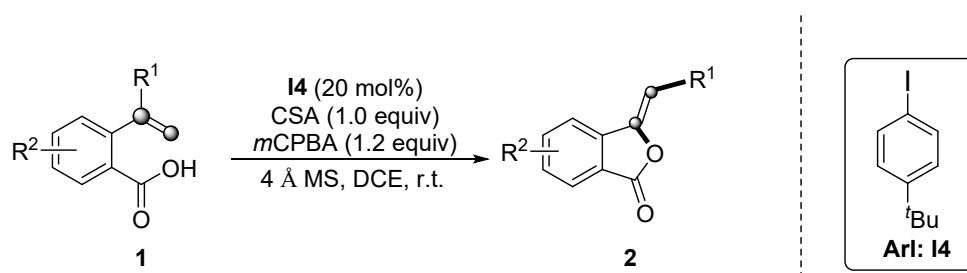

To a reaction flask filled with arylidene **I4** (20 mol %) in DCE (5.0 mL) was added *m*CPBA (1.2 equiv, 0.6 mmol), ( $\pm$ )-10-camphorsulfonic acid (1.0 equiv, 0.5 mmol) and 4 Å molecular sieves (0.1 g). The mixture was stirred at rt for 5 min and reactant **1** (0.5 mmol) was added. The resulting mixture was kept stirring until TLC indicated the total consumption of substrate **1**. Then the reaction mixture was quenched with aqueous saturated NaHCO<sub>3</sub> (5 mL), and extracted with dichloromethane (10 mL x 3). The combined organic layers were dried over anhydrous Na<sub>2</sub>SO<sub>4</sub> and the solvent was removed *in vacuo*. The residue was purified by flash column chromatography on silica gel to afford target product **2**.

### (*Z*)-3-Benzylideneisobenzofuran-1(3*H*)-one (**2a**)

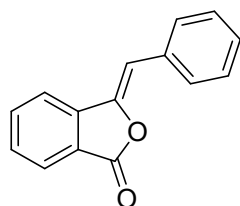

According to the procedure A, **2a** was purified by silica gel chromatography (PE/EtOAc

= 20/1). A white solid (91.1 mg, yield: 82%). mp: 82-84 °C. <sup>1</sup>H NMR (400 MHz, CDCl<sub>3</sub>) δ 7.94 (dd, *J* = 7.7, 0.9 Hz, 1H), 7.88 – 7.83 (m, 2H), 7.78 (dd, *J* = 7.9, 0.9 Hz, 1H), 7.75 – 7.70 (m, 1H), 7.57 – 7.52 (m, 1H), 7.45 – 7.39 (m, 2H), 7.35 – 7.29 (m, 1H), 6.43 (s, 1H). <sup>13</sup>C NMR (101 MHz, CDCl<sub>3</sub>) δ 167.1, 144.6, 140.6, 134.5, 133.1, 130.1, 129.8, 128.8, 128.4, 125.6, 123.4, 119.8, 107.1. HRMS (ESI) calcd for C<sub>15</sub>H<sub>10</sub>NaO<sub>2</sub><sup>+</sup> [*M* + Na<sup>+</sup>] 245.0573, found 245.0571.

**(*Z*)-3-Benzylidene-6-fluoroisobenzofuran-1(3*H*)-one (2b)**

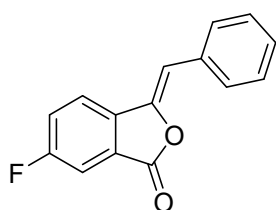

According to the procedure A, **2b** was purified by silica gel chromatography (PE/EtOAc = 20/1). A white solid (91.3 mg, yield: 76%). mp: 154-156 °C. <sup>1</sup>H NMR (400 MHz, CDCl<sub>3</sub>) δ 7.83 (d, *J* = 7.3 Hz, 2H), 7.76 (dd, *J* = 8.5, 4.2 Hz, 1H), 7.58 (dd, *J* = 7.1, 2.3 Hz, 1H), 7.46 (dd, *J* = 8.6, 2.4 Hz, 1H), 7.44 – 7.39 (m, 2H), 7.34 (d, *J* = 7.4 Hz, 1H), 6.38 (s, 1H). <sup>13</sup>C NMR (101 MHz, CDCl<sub>3</sub>) δ 165.9, (d, <sup>4</sup>*J*<sub>C-F</sub> = 4.1 Hz), 163.4, (d, <sup>1</sup>*J*<sub>C-F</sub> = 253.1 Hz), 143.8, 136.6, (d, <sup>4</sup>*J*<sub>C-F</sub> = 2.3 Hz), 132.9, 130.1, 128.8, 128.6, 125.3, (d, <sup>3</sup>*J*<sub>C-F</sub> = 9.4 Hz), 122.9, (d, <sup>2</sup>*J*<sub>C-F</sub> = 24.9 Hz), 121.8, (d, <sup>3</sup>*J*<sub>C-F</sub> = 8.9 Hz), 111.8, (d, <sup>2</sup>*J*<sub>C-F</sub> = 24.2 Hz), 107.2, (d, <sup>5</sup>*J*<sub>C-F</sub> = 2.3 Hz). HRMS (ESI) calcd for C<sub>15</sub>H<sub>9</sub>FNao<sub>2</sub><sup>+</sup> [*M* + Na<sup>+</sup>] 263.0479, found 263.0476.

**(*Z*)-3-Benzylidene-6-chloroisobenzofuran-1(3*H*)-one (2c)**

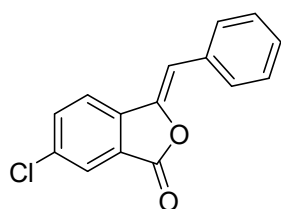

According to the procedure A, **2c** was purified by silica gel chromatography (PE/EtOAc = 20/1). A white solid (92.4 mg, yield: 72%). mp: 163-165 °C. <sup>1</sup>H NMR (400 MHz, CDCl<sub>3</sub>) δ 7.91 (dd, *J* = 1.8, 0.8 Hz, 1H), 7.86 – 7.82 (m, 2H), 7.74 – 7.67 (m, 2H), 7.42

(td,  $J = 6.8, 1.5$  Hz, 2H), 7.36 – 7.31 (m, 1H), 6.42 (s, 1H).  $^{13}\text{C}$  NMR (101 MHz,  $\text{CDCl}_3$ )  $\delta$  165.6, 143.8, 138.8, 136.0, 134.9, 132.8, 130.2, 128.9, 128.8, 125.5, 124.9, 121.1, 107.9. HRMS (ESI) calcd for  $\text{C}_{15}\text{H}_9^{35}\text{ClNaO}_2^+$  [ $\text{M} + \text{Na}^+$ ] 279.0183, found 279.0185.

**(Z)-3-Benzylidene-6-bromoisobenzofuran-1(3H)-one (2d)**

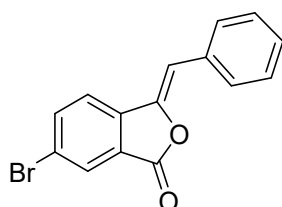

According to the procedure A, **2d** was purified by silica gel chromatography (PE/EtOAc = 20/1). A white solid (119.0 mg, yield: 79%). mp: 182-184 °C.  $^1\text{H}$  NMR (400 MHz,  $\text{CDCl}_3$ )  $\delta$  8.06 (s, 1H), 7.83 (d,  $J = 7.9$  Hz, 3H), 7.64 (d,  $J = 8.3$  Hz, 1H), 7.42 (t,  $J = 7.5$  Hz, 3H), 7.33 (t,  $J = 7.4$  Hz, 1H), 6.42 (s, 1H).  $^{13}\text{C}$  NMR (101 MHz,  $\text{CDCl}_3$ )  $\delta$  165.5, 143.8, 139.2, 137.6, 132.8, 130.2, 128.9, 128.8, 128.5, 125.1, 123.7, 121.2, 108.0. HRMS (ESI) calcd for  $\text{C}_{15}\text{H}_9^{79}\text{BrNaO}_2^+$  [ $\text{M} + \text{Na}^+$ ] 322.9678, found 322.9675.

**(Z)-3-Benzylidene-6-methylisobenzofuran-1(3H)-one (2e)**

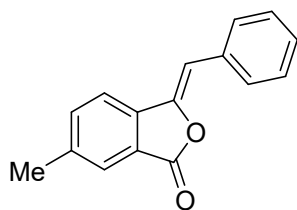

According to the procedure A, **2e** was purified by silica gel chromatography (PE/EtOAc = 20/1). A white solid (94.5 mg, yield: 80%). mp: 131-133 °C.  $^1\text{H}$  NMR (400 MHz,  $\text{CDCl}_3$ )  $\delta$  7.82 (d,  $J = 7.6$  Hz, 2H), 7.68 (s, 1H), 7.62 (d,  $J = 8.0$  Hz, 1H), 7.50 (d,  $J = 7.9$  Hz, 1H), 7.39 (t,  $J = 7.6$  Hz, 2H), 7.30 (t,  $J = 7.3$  Hz, 1H), 6.32 (s, 1H), 2.47 (s, 3H).  $^{13}\text{C}$  NMR (101 MHz,  $\text{CDCl}_3$ )  $\delta$  167.2, 144.7, 140.5, 138.2, 135.8, 133.3, 130.0, 128.7, 128.2, 125.4, 123.6, 119.6, 106.2, 21.6. HRMS (ESI) calcd for  $\text{C}_{16}\text{H}_{12}\text{NaO}_2^+$  [ $\text{M} + \text{Na}^+$ ] 259.0730, found 259.0732.

**(Z)-3-Benzylidene-6-methoxyisobenzofuran-1(3H)-one (2f)**

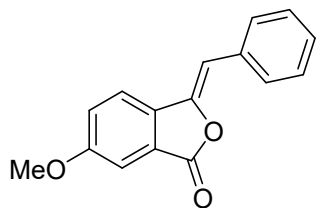

According to the procedure A, **2f** was purified by silica gel chromatography (PE/EtOAc = 20/1). A white solid (68.1 mg, yield: 54%). mp: 102-104 °C. <sup>1</sup>H NMR (400 MHz, CDCl<sub>3</sub>) δ 7.82 (d, *J* = 7.1 Hz, 2H), 7.66 (d, *J* = 8.6 Hz, 1H), 7.40 (t, *J* = 7.7 Hz, 2H), 7.34 (d, *J* = 2.4 Hz, 1H), 7.32 – 7.27 (m, 2H), 6.29 (s, 1H), 3.90 (s, 3H). <sup>13</sup>C NMR (101 MHz, CDCl<sub>3</sub>) δ 167.1, 161.4, 144.6, 133.6, 133.4, 129.9, 128.7, 128.1, 125.0, 124.0, 121.1, 106.8, 105.6, 55.9. HRMS (ESI) calcd for C<sub>16</sub>H<sub>12</sub>NaO<sub>3</sub><sup>+</sup> [M + Na<sup>+</sup>] 275.0679, found 275.0676.

**(Z)-3-Benzylidene-5-chloroisobenzofuran-1(3H)-one (2g)**

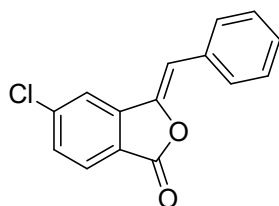

According to the procedure A, **2g** was purified by silica gel chromatography (PE/EtOAc = 20/1). A white solid (101.4 mg, yield: 79%). mp: 184-186 °C. <sup>1</sup>H NMR (400 MHz, CDCl<sub>3</sub>) δ 7.89 – 7.85 (m, 2H), 7.84 (s, 1H), 7.77 (d, *J* = 1.5 Hz, 1H), 7.51 (dd, *J* = 8.19, 1.7 Hz, 1H), 7.43 (t, *J* = 7.5 Hz, 2H), 7.37 – 7.32 (m, 1H), 6.43 (s, 1H). <sup>13</sup>C NMR (101 MHz, CDCl<sub>3</sub>) δ 166.0, 143.3, 142.1, 141.4, 132.7, 130.4, 130.3, 128.9, 126.8, 121.8, 120.0, 108.3. HRMS (ESI) calcd for C<sub>15</sub>H<sub>9</sub><sup>35</sup>ClNaO<sub>2</sub><sup>+</sup> [M + Na<sup>+</sup>] 279.0183, found 279.0181.

**(Z)-3-Benzylidene-5-bromoisobenzofuran-1(3H)-one (2h)**



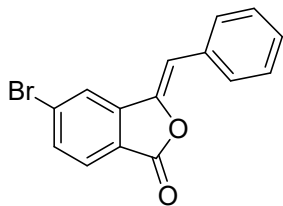

According to the procedure A, **2h** was purified by silica gel chromatography (PE/EtOAc = 20/1). A white solid (125.0 mg, yield: 83%). mp: 194-197 °C. <sup>1</sup>H NMR (400 MHz, CDCl<sub>3</sub>) δ 7.95 (d, *J* = 1.3 Hz, 1H), 7.86 – 7.79 (m, 3H), 7.67 (dd, *J* = 8.2, 1.5 Hz, 1H), 7.46 – 7.40 (m, 2H), 7.35 (t, *J* = 7.4 Hz, 1H), 6.43 (s, 1H). <sup>13</sup>C NMR (101 MHz, CDCl<sub>3</sub>) δ 166.1, 143.2, 142.2, 133.2, 132.7, 130.3, 129.8, 128.9, 126.8, 123.1, 122.1, 108.4. HRMS (ESI) calcd for C<sub>15</sub>H<sub>9</sub><sup>79</sup>BrNaO<sub>2</sub><sup>+</sup> [M + Na<sup>+</sup>] 322.9678, found 322.9677.

**(Z)-3-Benzylidene-5-methylisobenzofuran-1(3H)-one (2i)**

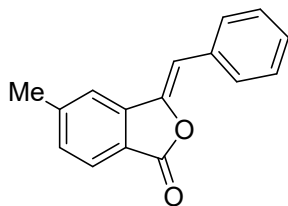

According to the procedure A, **2i** was purified by silica gel chromatography (PE/EtOAc = 20/1). A white solid (100.4 mg, yield: 85%). mp: 107-110 °C. <sup>1</sup>H NMR (400 MHz, CDCl<sub>3</sub>) δ 7.86 – 7.79 (m, 3H), 7.56 (s, 1H), 7.41 (t, *J* = 7.6 Hz, 2H), 7.35 (d, *J* = 7.9 Hz, 1H), 7.31 (tt, *J* = 6.6, 1.3 Hz, 1H), 6.38 (s, 1H), 2.53 (s, 3H). <sup>13</sup>C NMR (101 MHz, CDCl<sub>3</sub>) δ 167.1, 145.8, 144.7, 141.1, 133.2, 131.2, 130.1, 128.8, 128.3, 125.3, 121.0, 120.0, 106.6, 22.3. HRMS (ESI) calcd for C<sub>16</sub>H<sub>12</sub>NaO<sub>2</sub><sup>+</sup> [M + Na<sup>+</sup>] 259.0730, found 259.0732.

**(Z)-3-(4-Fluorobenzylidene)isobenzofuran-1(3H)-one (2j)**

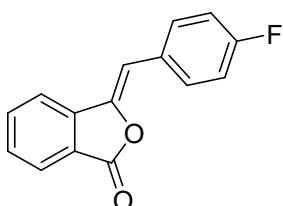

According to the procedure A, **2j** was purified by silica gel chromatography (PE/EtOAc = 20/1). A white solid (100.9 mg, yield: 84%). mp: 114-117 °C. <sup>1</sup>H NMR (400 MHz, CDCl<sub>3</sub>) δ 7.93 (d, *J* = 7.7 Hz, 1H), 7.83 (dd, *J* = 8.68, 5.5 Hz, 2H), 7.74 (q, *J* = 7.5 Hz, 2H), 7.58 – 7.52 (m, 1H), 7.09 (t, *J* = 8.7 Hz, 2H), 6.38 (s, 1H). <sup>13</sup>C NMR (101 MHz, CDCl<sub>3</sub>) δ 167.0, 162.5, (d, <sup>1</sup>*J*<sub>C-F</sub> = 250.9 Hz), 144.2, (d, <sup>5</sup>*J*<sub>C-F</sub> = 2.7 Hz) 140.5, 134.6, 131.9, (d, <sup>3</sup>*J*<sub>C-F</sub> = 8.2 Hz), 129.8, 129.3, (d, <sup>4</sup>*J*<sub>C-F</sub> = 3.5 Hz), 125.6, 123.3, 119.8, 115.9, (d, <sup>2</sup>*J*<sub>C-F</sub> = 21.8 Hz), 105.9. HRMS (ESI) calcd for C<sub>15</sub>H<sub>9</sub>FN<sub>2</sub>O<sub>2</sub><sup>+</sup> [M + Na<sup>+</sup>] 263.0479, found 263.0480.

**(Z)-3-(4-Chlorobenzylidene)isobenzofuran-1(3H)-one (2k)**

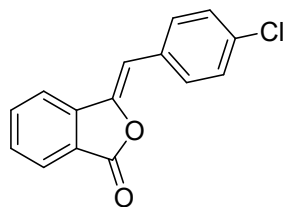

According to the procedure A, **2k** was purified by silica gel chromatography (PE/EtOAc = 20/1). A white solid (104.0 mg, yield: 81%). mp: 148-150 °C. <sup>1</sup>H NMR (400 MHz, CDCl<sub>3</sub>) δ 7.95 (d, *J* = 7.7 Hz, 1H), 7.80 (s, 1H), 7.77 (d, *J* = 5.0 Hz, 2H), 7.76 – 7.71 (m, 1H), 7.57 (ddd, *J* = 8.0, 6.8, 1.4 Hz, 1H), 7.38 (d, *J* = 8.6 Hz, 2H), 6.38 (s, 1H). <sup>13</sup>C NMR (101 MHz, CDCl<sub>3</sub>) δ 166.8, 144.9, 140.4, 134.6, 134.2, 131.6, 131.3, 130.0, 129.0, 125.7, 123.4, 119.9, 105.7. HRMS (ESI) calcd for C<sub>15</sub>H<sub>9</sub><sup>35</sup>ClNaO<sub>2</sub><sup>+</sup> [M + Na<sup>+</sup>] 279.0183, found 279.0184.

**(Z)-3-(4-Bromobenzylidene)isobenzofuran-1(3H)-one (2l)**

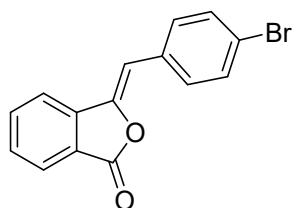

According to the procedure A, **2l** was purified by silica gel chromatography (PE/EtOAc = 20/1). A white solid (128.0 mg, yield: 85%). mp: 173-176 °C. <sup>1</sup>H NMR (400 MHz, CDCl<sub>3</sub>) δ 7.95 (d, *J* = 7.7 Hz, 1H), 7.79 – 7.69 (m, 4H), 7.60 – 7.51 (m, 3H), 6.36 (s, 1H). <sup>13</sup>C NMR (101 MHz, CDCl<sub>3</sub>) δ 166.8, 145.1, 140.4, 134.6, 132.0, 132.0, 131.5,

130.1, 125.7, 123.5, 122.6, 119.9, 105.8. HRMS (ESI) calcd for  $C_{15}H_9^{79}BrNaO_2^+$  [ $M + Na^+$ ] 322.9678, found 322.9675.

**(Z)-3-(4-Methylbenzylidene)isobenzofuran-1(3H)-one (2m)**

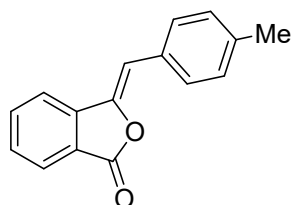

According to the procedure A, **2m** was purified by silica gel chromatography (PE/EtOAc = 20/1). A white solid (105.1 mg, yield: 89%). mp: 141-144 °C.  $^1H$  NMR (400 MHz,  $CDCl_3$ )  $\delta$  7.94 (d,  $J = 7.7$  Hz, 1H), 7.78 – 7.74 (m, 3H), 7.72 (t,  $J = 7.5$  Hz, 1H), 7.56 – 7.51 (m, 1H), 7.23 (d,  $J = 7.9$  Hz, 2H), 6.41 (s, 1H), 2.39 (s, 3H).  $^{13}C$  NMR (101 MHz,  $CDCl_3$ )  $\delta$  167.2, 144.0, 140.7, 138.7, 134.4, 130.3, 130.1, 129.6, 125.6, 123.3, 119.7, 107.2, 21.5. HRMS (ESI) calcd for  $C_{16}H_{12}NaO_2^+$  [ $M + Na^+$ ] 259.0730, found 259.0728.

**(Z)-3-(4-Ethylbenzylidene)isobenzofuran-1(3H)-one (2n)**

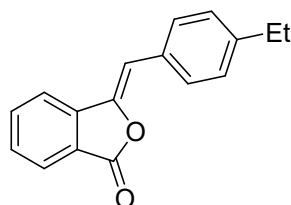

According to the procedure A, **2n** was purified by silica gel chromatography (PE/EtOAc = 20/1). A white solid (107.6 mg, yield: 86%). mp: 108-110°C.  $^1H$  NMR (400 MHz,  $CDCl_3$ )  $\delta$  7.94 (d,  $J = 7.7$  Hz, 1H), 7.80 – 7.75 (m, 3H), 7.74 – 7.69 (m, 1H), 7.56 – 7.51 (m, 1H), 7.25 (d,  $J = 8.0$  Hz, 2H), 6.42 (s, 1H), 2.68 (q,  $J = 7.6$  Hz, 2H), 1.26 (t,  $J = 7.6$  Hz, 3H).  $^{13}C$  NMR (101 MHz,  $CDCl_3$ )  $\delta$  167.2, 145.0, 144.0, 140.7, 134.4, 130.5, 130.2, 129.5, 128.4, 125.6, 123.4, 119.7, 107.2, 28.8, 15.4. HRMS (ESI) calcd for  $C_{17}H_{14}NaO_2^+$  [ $M + Na^+$ ] 273.0886, found 273.0884.

**(Z)-3-(4-(Tert-butyl)benzylidene)isobenzofuran-1(3H)-one (2o)**

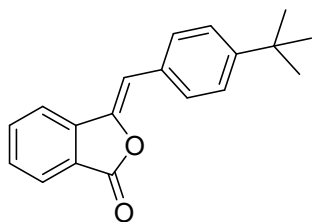

According to the procedure A, **2o** was purified by silica gel chromatography (PE/EtOAc = 20/1). A white solid (110.0 mg, yield: 79%). mp: 104-106°C. <sup>1</sup>H NMR (400 MHz, CDCl<sub>3</sub>) δ 7.93 (d, *J* = 7.4 Hz, 1H), 7.82 – 7.74 (m, 3H), 7.71 (t, *J* = 7.4 Hz, 1H), 7.53 (t, *J* = 7.3 Hz, 1H), 7.44 (d, *J* = 8.4 Hz, 2H), 6.42 (s, 1H), 1.35 (s, 9H). <sup>13</sup>C NMR (101 MHz, CDCl<sub>3</sub>) δ 167.2, 151.8, 144.1, 140.7, 134.4, 130.3, 130.0, 129.6, 125.8, 125.5, 123.3, 119.7, 107.1, 34.8, 31.2. HRMS (ESI) calcd for C<sub>19</sub>H<sub>18</sub>NaO<sub>2</sub><sup>+</sup> [M + Na<sup>+</sup>] 301.1199, found 301.1196.

**(Z)-3-(4-Methoxybenzylidene)isobenzofuran-1(3H)-one (2p)**

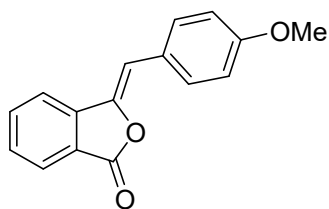

According to the procedure A, **2p** was purified by silica gel chromatography (PE/EtOAc = 20/1). A yellow solid (97.1 mg, yield: 77%). mp: 114-116°C. <sup>1</sup>H NMR (400 MHz, CDCl<sub>3</sub>) δ 7.92 (d, *J* = 5.7 Hz, 1H), 7.80 (dd, *J* = 8.6, 4.3 Hz, 2H), 7.71 (q, *J* = 7.0 Hz, 2H), 7.54 – 7.47 (m, 1H), 6.93 (dd, *J* = 8.7, 3.9 Hz, 2H), 6.37 (s, 1H), 3.85 (s, 3H). <sup>13</sup>C NMR (101 MHz, CDCl<sub>3</sub>) δ 167.3, 159.8, 143.1, 140.8, 134.4, 131.7, 129.3, 125.9, 125.5, 123.1, 119.5, 114.3, 107.0, 55.3. HRMS (ESI) calcd for C<sub>16</sub>H<sub>12</sub>NaO<sub>3</sub><sup>+</sup> [M + Na<sup>+</sup>] 275.0679, found 275.0677.

**(Z)-3-(2-Chlorobenzylidene)isobenzofuran-1(3H)-one (2q)**

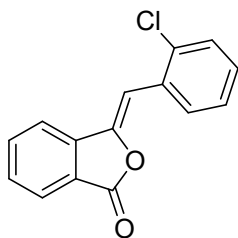

According to the procedure A, **2q** was purified by silica gel chromatography (PE/EtOAc = 20/1). A white solid (100.1 mg, yield: 78%). 5 mmol scale (921.6 mg, yield: 72%). mp: 161-163°C. <sup>1</sup>H NMR (400 MHz, CDCl<sub>3</sub>) δ 8.32 (dd, *J* = 8.0, 1.7 Hz, 1H), 7.96 (d, *J* = 7.7 Hz, 1H), 7.87 (d, *J* = 7.9 Hz, 1H), 7.79 – 7.73 (m, 1H), 7.62 – 7.56 (m, 1H), 7.43 (dd, *J* = 8.0, 1.3 Hz, 1H), 7.35 (td, *J* = 7.50, 1.1 Hz, 1H), 7.28 – 7.21 (m, 1H), 6.91 (s, 1H). <sup>13</sup>C NMR (101 MHz, CDCl<sub>3</sub>) δ 166.8, 145.8, 140.5, 134.7, 133.8, 131.8, 131.0, 130.2, 129.6, 129.3, 127.2, 125.6, 123.5, 120.3, 102.3. HRMS (ESI) calcd for C<sub>15</sub>H<sub>9</sub><sup>35</sup>ClNaO<sub>2</sub><sup>+</sup> [M + Na<sup>+</sup>] 279.0183, found 279.0184.

**(Z)-3-(3-Chlorobenzylidene)isobenzofuran-1(3H)-one (2r)**

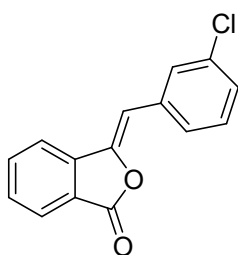

According to the procedure A, **2r** was purified by silica gel chromatography (PE/EtOAc = 20/1). A white solid (104.0 mg, yield: 81%). mp: 152-154°C. <sup>1</sup>H NMR (400 MHz, CDCl<sub>3</sub>) δ 7.94 (d, *J* = 7.7 Hz, 1H), 7.82 (s, 1H), 7.75 (q, *J* = 10.8, 9.4 Hz, 3H), 7.57 (t, *J* = 7.1 Hz, 1H), 7.33 (t, *J* = 7.8 Hz, 1H), 7.28 (d, *J* = 7.2 Hz, 1H), 6.34 (s, 1H). <sup>13</sup>C NMR (101 MHz, CDCl<sub>3</sub>) δ 166.7, 145.5, 140.3, 134.8, 134.7, 134.7, 130.2, 130.0, 129.7, 128.3, 128.1, 125.7, 123.5, 120.0, 105.5. HRMS (ESI) calcd for C<sub>15</sub>H<sub>9</sub><sup>35</sup>ClNaO<sub>2</sub><sup>+</sup> [M + Na<sup>+</sup>] 279.0183, found 279.0182.

**(Z)-3-(Naphthalen-2-ylmethylene)isobenzofuran-1(3H)-one (2s)**

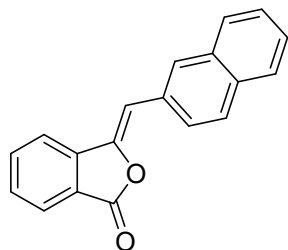

According to the procedure A, **2s** was purified by silica gel chromatography (PE/EtOAc = 20/1). A white solid (114.4 mg, yield: 84%). mp: 170-172°C. <sup>1</sup>H NMR (400 MHz, CDCl<sub>3</sub>) δ 8.24 (s, 1H), 8.04 (dd, *J* = 8.6, 1.7 Hz, 1H), 7.95 (d, *J* = 7.7 Hz, 1H), 7.91 – 7.87 (m, 1H), 7.85 (d, *J* = 8.8 Hz, 1H), 7.84 – 7.77 (m, 2H), 7.73 (t, *J* = 7.4 Hz, 1H), 7.55 (t, *J* = 7.4 Hz, 1H), 7.52 – 7.47 (m, 2H), 6.57 (s, 1H). <sup>13</sup>C NMR (101 MHz, CDCl<sub>3</sub>) δ 167.1, 144.8, 140.6, 134.5, 133.5, 133.0, 130.7, 129.9, 129.8, 128.5, 128.4, 127.7, 127.3, 126.7, 126.4, 125.6, 123.4, 119.8, 107.3. HRMS (ESI) calcd for C<sub>19</sub>H<sub>12</sub>NaO<sub>2</sub><sup>+</sup> [M + Na<sup>+</sup>] 295.0730, found 295.0731.

**(Z)-3-(Thiophen-2-ylmethylene)isobenzofuran-1(3H)-one (2t)**

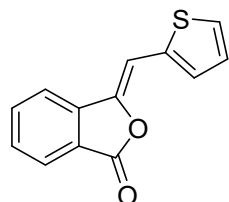

According to the procedure A, **2t** was purified by silica gel chromatography (PE/EtOAc = 20/1). A white solid (93.6 mg, yield: 82%). mp: 112-114°C. <sup>1</sup>H NMR (400 MHz, CDCl<sub>3</sub>) δ 7.93 (dt, *J* = 7.71, 0.9 Hz, 1H), 7.74 – 7.71 (m, 1H), 7.71 – 7.68 (m, 1H), 7.53 (ddd, *J* = 8.0, 5.41, 2.7 Hz, 1H), 7.45 (d, *J* = 5.1 Hz, 1H), 7.40 (d, *J* = 3.6 Hz, 1H), 6.70 (s, 1H). <sup>13</sup>C NMR (101 MHz, CDCl<sub>3</sub>) δ 166.5, 142.9, 139.8, 136.2, 134.5, 129.6, 129.6, 128.9, 127.5, 125.8, 123.8, 119.6, 101.1. HRMS (ESI) calcd for C<sub>13</sub>H<sub>8</sub>NaO<sub>2</sub><sup>+</sup> [M + Na<sup>+</sup>] 251.0137, found 251.0135.

**(Z)-3-benzylidene-7-methylisobenzofuran-1(3H)-one (2u)**

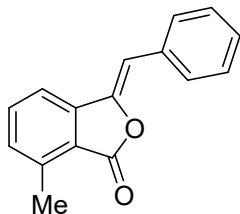

According to the procedure A, **2u** was purified by silica gel chromatography (petroleum ester/EtOAc = 20/1). A white solid (92.1 mg, yield: 78%). mp: 149-151 °C. <sup>1</sup>H NMR (400 MHz, CDCl<sub>3</sub>) δ 7.83 (d, *J* = 8.3 Hz, 2H), 7.54 (d, *J* = 4.3 Hz, 2H), 7.40 (t, *J* = 7.6 Hz, 2H), 7.33 – 7.28 (m, 1H), 7.26 (d, *J* = 3.8 Hz, 1H), 6.35 (s, 1H), 2.69 (s, 3H). <sup>13</sup>C NMR (101 MHz, CDCl<sub>3</sub>) δ 167.2, 144.5, 141.0, 139.6, 134.2, 133.3, 131.3, 130.0, 128.7, 128.2, 121.1, 117.2, 106.3, 17.5. HRMS (ESI) calcd for C<sub>16</sub>H<sub>12</sub>NaO<sub>2</sub><sup>+</sup> [M + Na<sup>+</sup>] 259.0730, found 259.0732.

### 3. Typical Synthetic Procedure B and Spectroscopic Data of 3a-l

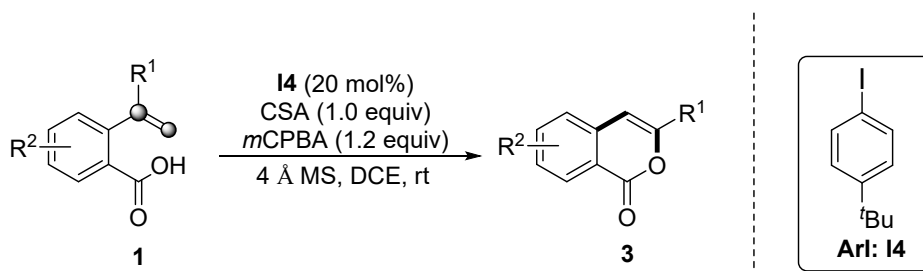

To a reaction flask filled with aryl iodide **I4** (20 mol %) in DCE (5.0 ml) was added *m*CPBA (1.2 equiv, 0.6 mmol), (±)-10-camphorsulfonic acid (1.0 equiv, 0.5 mmol) and 4 Å molecular sieves (0.1 g). The mixture was stirred at rt for 5 min and then reactant **1** (0.5 mmol) was added. The resulting mixture was kept stirring until TLC indicated the total consumption of substrate **1**. Then the reaction mixture was quenched with aqueous saturated NaHCO<sub>3</sub> (5 mL), and extracted with dichloromethane (10 mL x 3). The combined organic layers were dried over anhydrous Na<sub>2</sub>SO<sub>4</sub> and the solvent was removed *in vacuo*. The residue was purified by flash column chromatography on silica gel to afford target product **3**.

#### 3-Methyl-1*H*-isochromen-1-one (3a)

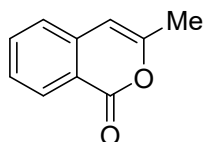

According to the procedure B, **3a** was purified by silica gel chromatography (PE/EtOAc = 20/1). A white solid (69.7 mg, yield: 87%). mp: 69-72°C. <sup>1</sup>H NMR (400 MHz, CDCl<sub>3</sub>) δ 8.25 (d, *J* = 8.1 Hz, 1H), 7.67 (td, *J* = 7.6, 1.4 Hz, 1H), 7.47 – 7.42 (m, 1H), 7.34 (d, *J* = 7.9 Hz, 1H), 6.26 (s, 1H), 2.28 (d, *J* = 1.0 Hz, 3H). <sup>13</sup>C NMR (101 MHz, CDCl<sub>3</sub>) δ 163.0, 154.6, 137.7, 134.7, 129.5, 127.6, 124.9, 119.9, 103.5, 19.7. HRMS (ESI) calcd for C<sub>10</sub>H<sub>8</sub>NaO<sub>2</sub><sup>+</sup> [M + Na<sup>+</sup>] 183.0417, found 183.0416.

### 3-Ethyl-1H-isochromen-1-one (3b)

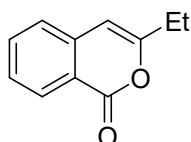

According to the procedure B, **3b** was purified by silica gel chromatography (PE/EtOAc = 20/1). A white solid (76.6 mg, yield: 88%). mp: 68-70°C. <sup>1</sup>H NMR (400 MHz, CDCl<sub>3</sub>) δ 8.26 – 8.20 (m, 1H), 7.65 (td, *J* = 7.7, 1.4 Hz, 1H), 7.46 – 7.40 (m, 1H), 7.34 (d, *J* = 7.9 Hz, 1H), 6.23 (s, 1H), 2.55 (q, *J* = 7.5 Hz, 2H), 1.26 (t, *J* = 7.5 Hz, 3H). <sup>13</sup>C NMR (101 MHz, CDCl<sub>3</sub>) δ 163.0, 159.5, 137.6, 134.7, 129.5, 127.5, 125.1, 120.1, 102.0, 26.7, 11.2. HRMS (ESI) calcd for C<sub>11</sub>H<sub>10</sub>NaO<sub>2</sub><sup>+</sup> [M + Na<sup>+</sup>] 197.0573, found 197.0571.

### 3-Propyl-1H-isochromen-1-one (3c)

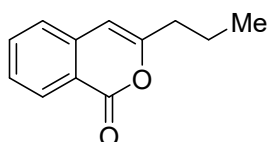

According to the procedure B, **3c** was purified by silica gel chromatography (PE/EtOAc = 20/1). Colorless liquid (66.8 mg, yield: 71%). <sup>1</sup>H NMR (400 MHz, CDCl<sub>3</sub>) δ 8.22 (d, *J* = 8.0 Hz, 1H), 7.64 (td, *J* = 7.8, 1.3 Hz, 1H), 7.44 – 7.39 (m, 1H), 7.33 (d, *J* = 7.9 Hz, 1H), 6.23 (s, 1H), 2.48 (t, *J* = 7.5 Hz, 2H), 1.77 – 1.66 (m, 2H), 0.97 (t, *J* = 7.4 Hz, 3H). <sup>13</sup>C NMR (101 MHz, CDCl<sub>3</sub>) δ 163.1, 158.0, 137.6, 134.7,



129.4, 127.5, 125.0, 120.1, 103.0, 35.4, 20.2, 13.5. HRMS (ESI) calcd for  $C_{12}H_{12}NaO_2^+$   $[M + Na^+]$  211.0730, found 211.0732.

### 3-Isopropyl-1*H*-isochromen-1-one (3d)

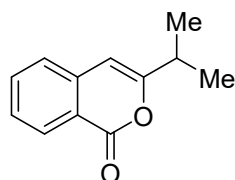

According to the procedure B, **3d** was purified by silica gel chromatography (PE/EtOAc = 20/1). Colorless liquid (81.9 mg, yield: 87%).  $^1H$  NMR (400 MHz,  $CDCl_3$ )  $\delta$  8.18 (d,  $J = 8.0$  Hz, 1H), 7.64 – 7.58 (m, 1H), 7.38 (t,  $J = 7.6$  Hz, 1H), 7.31 (d,  $J = 7.9$  Hz, 1H), 6.20 (s, 1H), 2.72 (hept,  $J = 6.6$  Hz, 1H), 1.24 (d,  $J = 6.9$  Hz, 6H).  $^{13}C$  NMR (101 MHz,  $CDCl_3$ )  $\delta$  163.0, 162.9, 137.6, 134.7, 129.3, 127.5, 125.3, 120.2, 100.6, 32.3, 20.2. HRMS (ESI) calcd for  $C_{12}H_{12}NaO_2^+$   $[M + Na^+]$  211.0730, found 211.0729.

### 3-Butyl-1*H*-isochromen-1-one (3e)

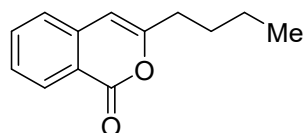

According to the procedure B, **3e** was purified by silica gel chromatography (PE/EtOAc = 20/1). Colorless liquid (91.0 mg, yield: 90%).  $^1H$  NMR (400 MHz,  $CDCl_3$ )  $\delta$  8.24 (d,  $J = 8.0$  Hz, 1H), 7.66 (td,  $J = 8.0, 1.3$  Hz, 1H), 7.47 – 7.41 (m, 1H), 7.34 (d,  $J = 7.8$  Hz, 1H), 6.25 (s, 1H), 2.55 – 2.49 (m, 2H), 1.69 (p,  $J = 7.5$  Hz, 2H), 1.40 (h,  $J = 7.4$  Hz, 2H), 0.94 (t,  $J = 7.4$  Hz, 3H).  $^{13}C$  NMR (101 MHz,  $CDCl_3$ )  $\delta$  163.1, 158.3, 137.6, 134.7, 129.5, 127.5, 125.0, 120.1, 102.9, 33.2, 29.0, 22.1, 13.8. HRMS (ESI) calcd for  $C_{13}H_{14}NaO_2^+$   $[M + Na^+]$  225.0886, found 225.0884.

### 3-(Tert-butyl)-1*H*-isochromen-1-one (3f)

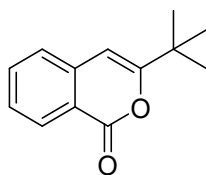

According to the procedure B, **3f** was purified by silica gel chromatography (PE/EtOAc = 20/1). A white solid (90.0 mg, yield: 89%). mp: 59-62°C. <sup>1</sup>H NMR (400 MHz, CDCl<sub>3</sub>) δ 8.24 (d, *J* = 7.9 Hz, 1H), 7.70 – 7.62 (m, 1H), 7.43 (t, *J* = 7.3 Hz, 1H), 7.37 (d, *J* = 7.8 Hz, 1H), 6.30 (s, 1H), 1.32 (s, 9H). <sup>13</sup>C NMR (101 MHz, CDCl<sub>3</sub>) δ 165.1, 163.0, 137.7, 134.6, 129.4, 127.6, 125.5, 120.1, 99.7, 35.6, 28.0. HRMS (ESI) calcd for C<sub>13</sub>H<sub>14</sub>NaO<sub>2</sub><sup>+</sup> [M + Na<sup>+</sup>] 225.0886, found 225.0885.

### 3-Pentyl-1H-isochromen-1-one (3g)

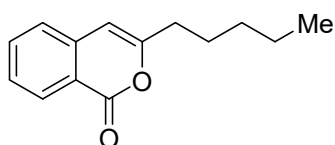

According to the procedure B, **3g** was purified by silica gel chromatography (PE/EtOAc = 20/1). Colorless liquid (96.2 mg, yield: 89%). <sup>1</sup>H NMR (400 MHz, CDCl<sub>3</sub>) δ 8.24 (d, *J* = 8.5 Hz, 1H), 7.66 (td, *J* = 7.8, 1.3 Hz, 1H), 7.46 – 7.41 (m, 1H), 7.34 (d, *J* = 7.8 Hz, 1H), 6.24 (d, *J* = 0.9 Hz, 1H), 2.55 – 2.47 (m, 2H), 1.70 (p, *J* = 7.5 Hz, 2H), 1.35 (dq, *J* = 7.1, 3.5 Hz, 4H), 0.92 – 0.87 (m, 3H). <sup>13</sup>C NMR (101 MHz, CDCl<sub>3</sub>) δ 163.1, 158.3, 137.6, 134.7, 129.5, 127.5, 125.0, 120.1, 102.9, 33.5, 31.2, 26.6, 22.4, 14.0. HRMS (ESI) calcd for C<sub>14</sub>H<sub>16</sub>NaO<sub>2</sub><sup>+</sup> [M + Na<sup>+</sup>] 239.1043, found 239.1041.

### 3-Hexyl-1H-isochromen-1-one (3h)

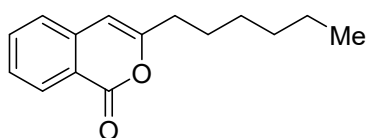

According to the procedure B, **3h** was purified by silica gel chromatography (PE/EtOAc = 20/1). Colorless liquid (99.0 mg, yield: 86%). <sup>1</sup>H NMR (400 MHz, CDCl<sub>3</sub>) δ 8.22 (d, *J* = 7.9 Hz, 1H), 7.64 (td, *J* = 7.8, 1.2 Hz, 1H), 7.44 – 7.39 (m, 1H), 7.33 (d, *J* = 7.8 Hz, 1H), 6.23 (s, 1H), 2.49 (t, *J* = 7.6 Hz, 2H), 1.67 (p, *J* = 7.5 Hz, 2H),

1.39 – 1.32 (m, 2H), 1.32 – 1.22 (m, 4H), 0.89 – 0.83 (m, 3H).  $^{13}\text{C}$  NMR (101 MHz,  $\text{CDCl}_3$ )  $\delta$  163.1, 158.3, 137.6, 134.7, 129.4, 127.5, 125.0, 120.1, 102.9, 33.5, 31.5, 28.7, 26.9, 22.5, 14.1. HRMS (ESI) calcd for  $\text{C}_{15}\text{H}_{18}\text{NaO}_2^+$  [ $\text{M} + \text{Na}^+$ ] 253.1199, found 253.1196.

### 3-Cyclohexyl-1*H*-isochromen-1-one (3i)

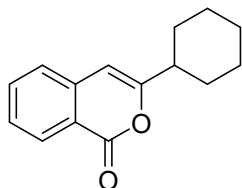

According to the procedure B, **3i** was purified by silica gel chromatography (PE/EtOAc = 20/1). Colorless liquid (97.0 mg, yield: 85%).  $^1\text{H}$  NMR (400 MHz,  $\text{CDCl}_3$ )  $\delta$  8.25 (d,  $J = 8.0$  Hz, 1H), 7.66 (td,  $J = 7.7, 1.3$  Hz, 1H), 7.46 – 7.42 (m, 1H), 7.36 (d,  $J = 7.9$  Hz, 1H), 6.23 (s, 1H), 2.49 – 2.40 (m, 1H), 2.04 (d,  $J = 11.7$  Hz, 2H), 1.85 (dt,  $J = 12.1, 2.8$  Hz, 2H), 1.78 – 1.70 (m, 1H), 1.46 (ddd,  $J = 24.0, 12.1, 2.4$  Hz, 2H), 1.36 – 1.18 (m, 3H).  $^{13}\text{C}$  NMR (101 MHz,  $\text{CDCl}_3$ )  $\delta$  163.2, 162.4, 137.8, 134.6, 129.5, 127.5, 125.2, 120.3, 100.9, 41.9, 30.6, 26.0, 25.9. HRMS (ESI) calcd for  $\text{C}_{15}\text{H}_{16}\text{NaO}_2^+$  [ $\text{M} + \text{Na}^+$ ] 251.1043, found 251.1044.

### 3,5-Dimethyl-1*H*-isochromen-1-one (3j)

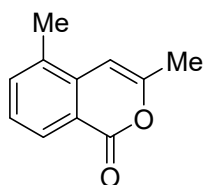

According to the procedure B, **3j** was purified by silica gel chromatography (PE/EtOAc = 20/1). A white solid (74.9 mg, yield: 86%). mp: 130-132°C.  $^1\text{H}$  NMR (400 MHz,  $\text{CDCl}_3$ )  $\delta$  8.08 (d,  $J = 7.9$  Hz, 1H), 7.48 (d,  $J = 7.3$  Hz, 1H), 7.30 (t,  $J = 7.7$  Hz, 1H), 6.34 (s, 1H), 2.42 (s, 3H), 2.28 (s, 3H).  $^{13}\text{C}$  NMR (101 MHz,  $\text{CDCl}_3$ )  $\delta$  163.3, 154.1, 136.3, 135.6, 132.5, 127.3, 127.0, 119.9, 100.4, 19.9, 18.7. HRMS (ESI) calcd for  $\text{C}_{11}\text{H}_{10}\text{NaO}_2^+$  [ $\text{M} + \text{Na}^+$ ] 197.0573, found 197.0575.

### 6-Chloro-3-methyl-1*H*-isochromen-1-one (3k)

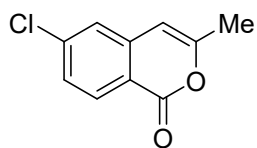

According to the procedure B, **3k** was purified by silica gel chromatography (PE/EtOAc = 20/1). A white solid (62.3 mg, yield: 64%). mp: 148-150°C. <sup>1</sup>H NMR (400 MHz, CDCl<sub>3</sub>) δ 8.09 (d, *J* = 8.5 Hz, 1H), 7.32 (d, *J* = 8.4 Hz, 1H), 7.25 (s, 1H), 6.13 (s, 1H), 2.23 (s, 3H). <sup>13</sup>C NMR (101 MHz, CDCl<sub>3</sub>) δ 162.0, 156.1, 141.3, 138.9, 131.1, 128.0, 124.4, 118.1, 102.7, 19.7. HRMS (ESI) calcd for C<sub>10</sub>H<sub>7</sub><sup>35</sup>ClNaO<sub>2</sub><sup>+</sup> [M + Na<sup>+</sup>] 217.0027, found 217.0026.

### 3,7-Dimethyl-1*H*-isochromen-1-one (3l)

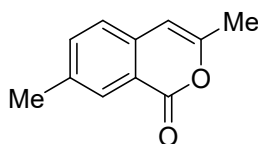

According to the procedure B, **3l** was purified by silica gel chromatography (PE/EtOAc = 20/1). A white solid (67.1 mg, yield: 77%). mp: 119-121°C. <sup>1</sup>H NMR (400 MHz, CDCl<sub>3</sub>) δ 8.00 (s, 1H), 7.47 – 7.42 (m, 1H), 7.20 (d, *J* = 8.0 Hz, 1H), 6.19 (s, 1H), 2.40 (s, 3H), 2.23 (s, 3H). <sup>13</sup>C NMR (101 MHz, CDCl<sub>3</sub>) δ 163.2, 153.6, 137.7, 136.0, 135.2, 129.1, 124.8, 119.7, 103.4, 21.3, 19.6. HRMS (ESI) calcd for C<sub>11</sub>H<sub>10</sub>NaO<sub>2</sub><sup>+</sup> [M + Na<sup>+</sup>] 197.0573, found 197.0570.

## 4. Synthetic Procedure<sup>[2]</sup> and Spectroscopic Data of 3-(2-Chlorobenzyl)isobenzofuran-1(3*H*)-one (**5**)

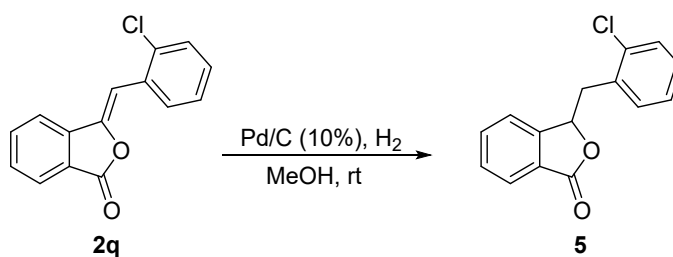

A solution of (*Z*)-3-(2-Chlorobenzylidene)isobenzofuran-1(3*H*)-one **2q** (0.5mmol) in dry methanol (10 mL) was stirred with palladium/charcoal (10%, 20.0 mg) under a

hydrogen atmosphere at rt for 16 h. The catalyst was removed by suction filtration and the solvent evaporated under reduced pressure. The mixture was purified by silica gel chromatography to obtain the hydrogenated product **5** as colorless liquid.

### 3-(2-Chlorobenzyl)isobenzofuran-1(3H)-one (**5**)

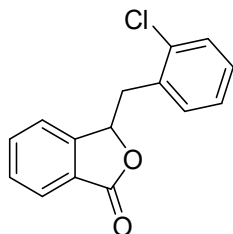

According to the procedure above, **5** was purified by silica gel chromatography (PE/EtOAc = 10/1). Colorless liquid (125.5 mg, yield: 97%). <sup>1</sup>H NMR (400 MHz, CDCl<sub>3</sub>) δ 7.85 (d, *J* = 7.6 Hz, 1H), 7.65 – 7.59 (m, 1H), 7.50 (t, *J* = 7.5 Hz, 1H), 7.31 (dd, *J* = 6.6, 1.5 Hz, 1H), 7.28 (dd, *J* = 4.2, 2.0 Hz, 1H), 7.25 – 7.19 (m, 3H), 5.71 (t, *J* = 6.4 Hz, 1H), 3.29 (dd, *J* = 14.1, 6.7 Hz, 1H), 3.18 (dd, *J* = 14.1, 6.1 Hz, 1H). <sup>13</sup>C NMR (101 MHz, CDCl<sub>3</sub>) δ 170.3, 149.1, 135.0, 133.8, 129.7, 129.2, 128.5, 127.2, 126.2, 125.7, 122.4, 81.2, 40.9. HRMS (ESI) calcd for C<sub>15</sub>H<sub>11</sub><sup>35</sup>ClNaO<sub>2</sub><sup>+</sup> [*M* + Na<sup>+</sup>] 281.0340, found 281.0338.

### 5. Synthetic Procedure<sup>[3]</sup> and Spectroscopic Data of 5-(2-Chlorobenzyl)-2,5-dihydro-3H-imidazo[2,1-*a*]isoindol-5-ol (**6**)

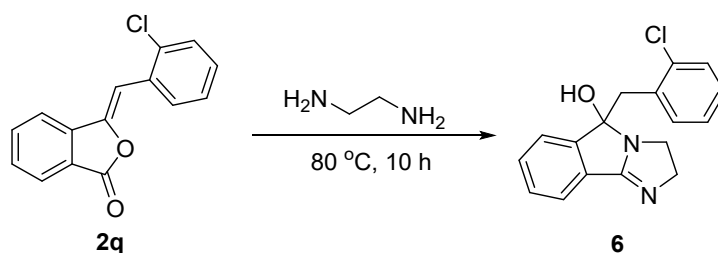

Compound **2q** (0.5 mmol) was dissolved into ethylenediamine (5 mL) and the mixture was heated at 80 °C with magnetic stirring for 10 h. After cooling to rt, the reaction mixture was extracted with EtOAc (10 mL x 3) and washed with water to pH = 7. The combined organic layers were dried over anhydrous Na<sub>2</sub>SO<sub>4</sub> and the solvent was removed in vacuo. The residue was purified by recrystallization from EtOAc/petroleum ether to give the product **3a** as a white solid.

### 5-(2-Chlorobenzyl)-2,5-dihydro-3H-imidazo[2,1-a]isoindol-5-ol (6)

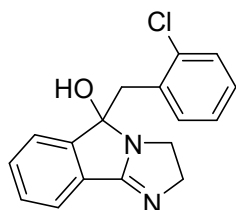

According to the procedure above, **6** was purified by crystallization. A white solid (143.4 mg, yield: 96%). mp: 209-212 °C. <sup>1</sup>H NMR (400 MHz, CDCl<sub>3</sub>) δ 7.62 (d, *J* = 6.39 Hz, 1H), 7.51 – 7.43 (m, 1H), 7.35 (dd, *J* = 21.89, 6.55 Hz, 2H), 7.22 (d, *J* = 6.90 Hz, 1H), 7.13 – 6.96 (m, 3H), 4.14 (d, *J* = 14.26 Hz, 1H), 3.61 (d, *J* = 13.95 Hz, 1H), 3.38 (d, *J* = 13.94 Hz, 1H), 3.19 (t, *J* = 12.10 Hz, 1H), 3.02 (d, *J* = 12.75 Hz, 1H), 2.90 (t, *J* = 11.42 Hz, 1H). <sup>13</sup>C NMR (101 MHz, CDCl<sub>3</sub>) δ 167.5, 147.9, 134.9, 133.2, 131.9, 131.7, 130.6, 129.5, 128.9, 128.2, 126.3, 122.9, 122.6, 88.9, 41.8, 40.7, 39.2. HRMS (ESI) calcd for C<sub>17</sub>H<sub>15</sub><sup>35</sup>ClN<sub>2</sub>NaO<sup>+</sup> [*M* + Na<sup>+</sup>] 321.0675, found 321.0673.

### 5. Synthetic Procedure<sup>[4]</sup> and Spectroscopic Data of modified Koser reagent HCIB

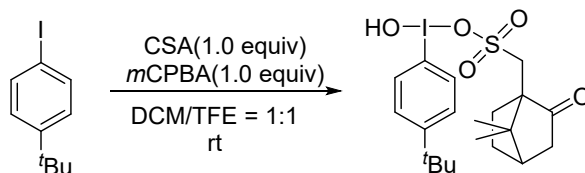

To a stirred solution of iodoarene (0.50 mmol) in dichloromethane/TFE (1:1 v/v, 5.0 mL) was added *m*CPBA (0.50 mmol), followed by (±)-10-camphorsulfonic acid (0.50 mmol). The resulting solution was stirred at rt for 30 min and concentrated under a stream of air, then diethyl ether (10.0 mL) was added to the remaining residue. The resulting precipitate was filtered off and dried *in vacuo* to give the corresponding Koser reagent as a white solid.

### HCIB

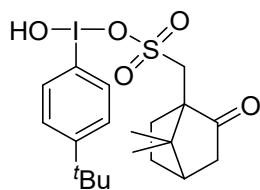

According to the procedure above, **HCIB** was purified by crystallization. A colorless solid (228.8 mg, yield: 90%). mp: 125-128 °C.  $^1\text{H}$  NMR (400 MHz,  $\text{CDCl}_3$ )  $\delta$  8.08 (s, 2H), 7.54 – 7.44 (m, 2H), 3.27 (d,  $J = 13.8$  Hz, 1H), 2.73 (d,  $J = 14.1$  Hz, 1H), 2.31 (d,  $J = 18.2$  Hz, 2H), 2.02 (s, 1H), 1.86 (d,  $J = 18.4$  Hz, 2H), 1.54 (s, 1H), 1.32 (s, 10H), 0.96 (s, 3H), 0.76 (s, 1H).  $^{13}\text{C}$  NMR (101 MHz,  $\text{CDCl}_3$ )  $\delta$  216.4, 156.4, 134.3, 128.5, 58.3, 48.0, 47.9, 42.8, 42.6, 35.3, 31.1, 26.9, 24.6, 19.8, 19.8. HRMS (ESI) calcd for  $\text{C}_{20}\text{H}_{29}\text{INaO}_5\text{S}^+$  [ $\text{M} + \text{Na}^+$ ] 531.0673, found 531.0671.

### III. References:

1. (a) S. Yang; S.-F. Zhu; N. Guo; S. Song; Q.-L. Zhou. *Org. Biomol. Chem.*, 2014, **12**, 2049-2052; (b) B. Suchand; G. Satyanarayana. *J. Org. Chem.*, 2016, **81**, 6409-6423; (c) B. N. Hemric; K. Shen; Q. Wang. *J. Am. Chem. Soc.*, 2016, **138**, 5813-5816; (d) J. Zhang; A. Jalil; J. He; Z. Yu; Y. Cheng; G. Li; Y. Du; K. Zhao. *Chem. Commun.*, 2021, **57**, 7426-7429.
2. N. G. Kundu; M. Pal; B. Nandi. *J. Chem. Soc., Perkin Trans. 1*, 1998, 561-568.
3. E. d. Olmo; B. Barboza; L. D. Chiaradia; A. Moreno; J. Carrero-Lérida; D. González-Pacanowska; V. Muñoz; J. L. López-Pérez; A. Giménez; A. Benito; A. R. Martínez; L. M. Ruiz-Pérez; A. San Feliciano. *Eur. J. Med. Chem.*, 2011, **46**, 5379-5386.
4. E. A. Merritt; V. M. T. Carneiro; L. F. Silva; B. Olofsson. *J. Org. Chem.*, 2010, **75**, 7416-7419.



#### IV. $^1\text{H}$ and $^{13}\text{C}$ NMR Spectra of Compounds 2a-u, 3a-l, 5, 6:

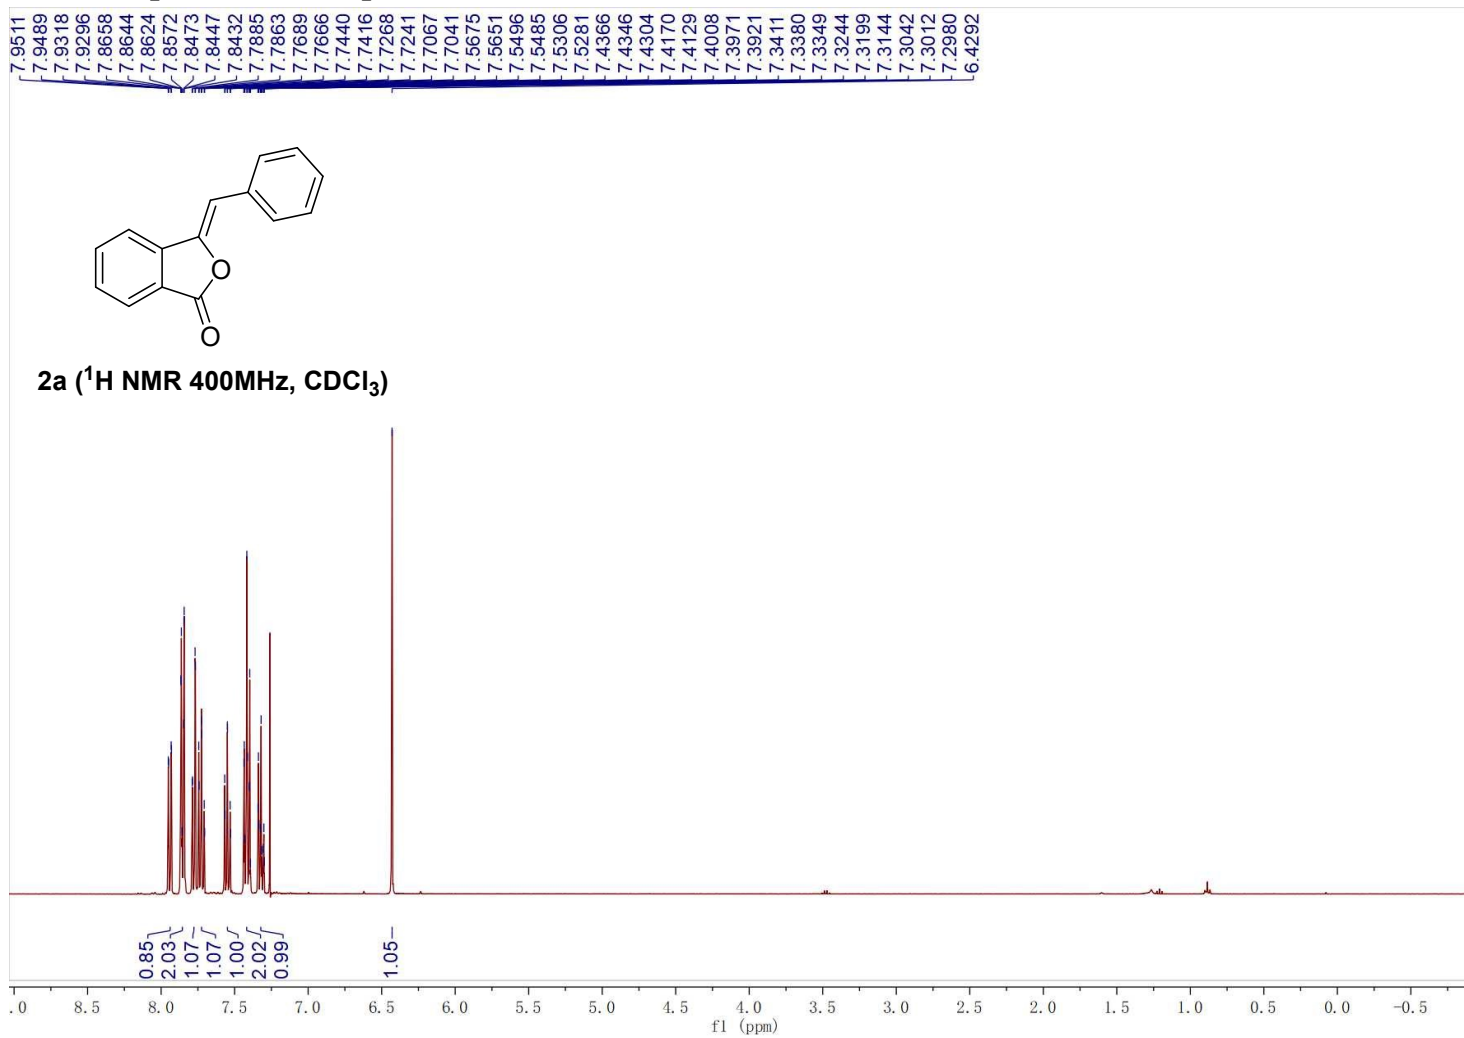

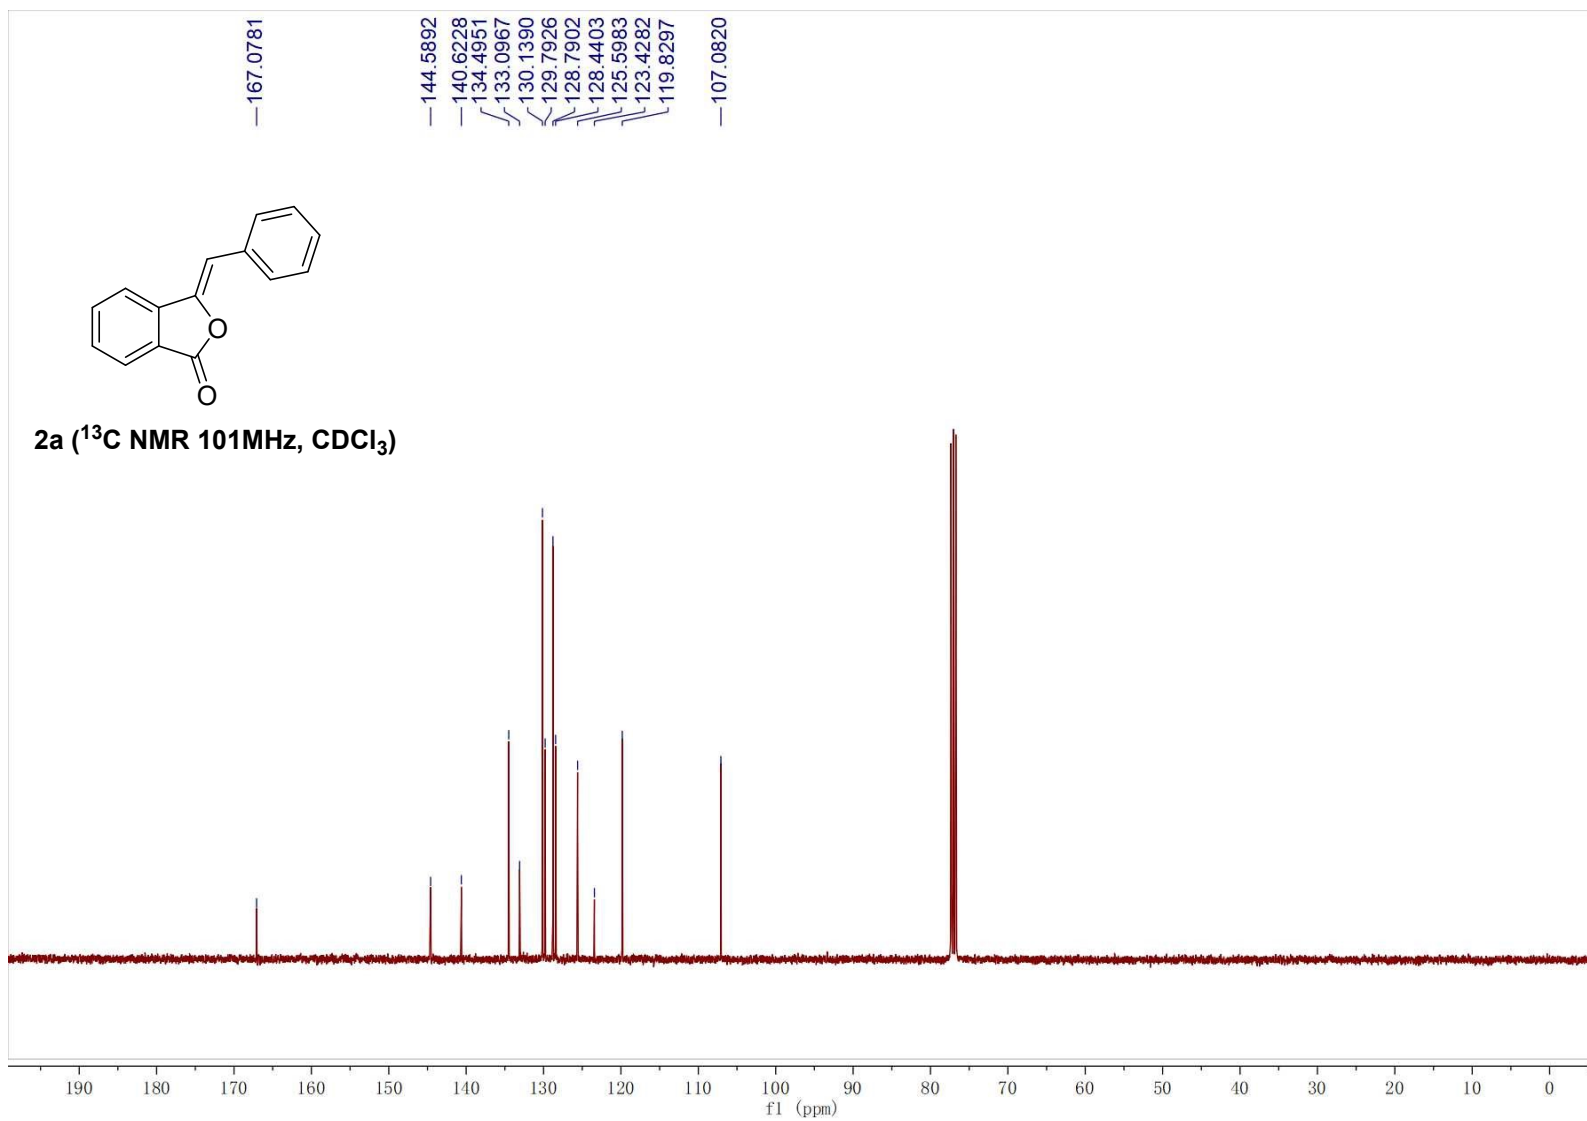

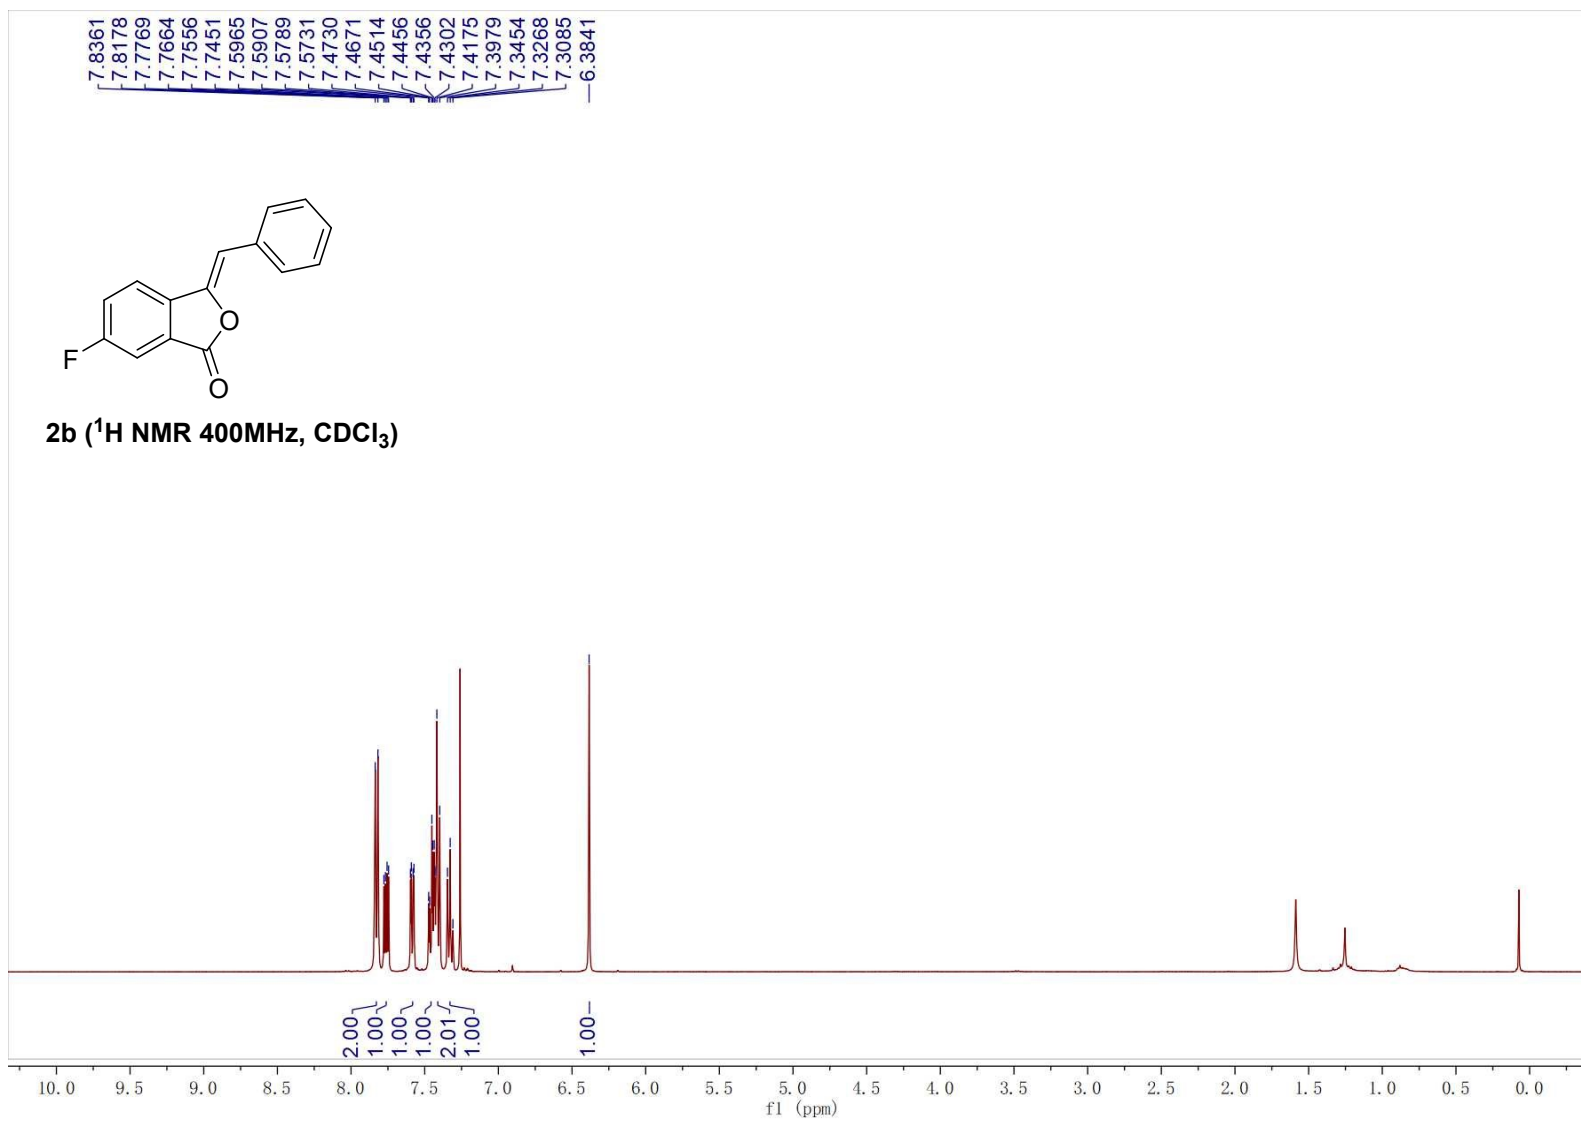

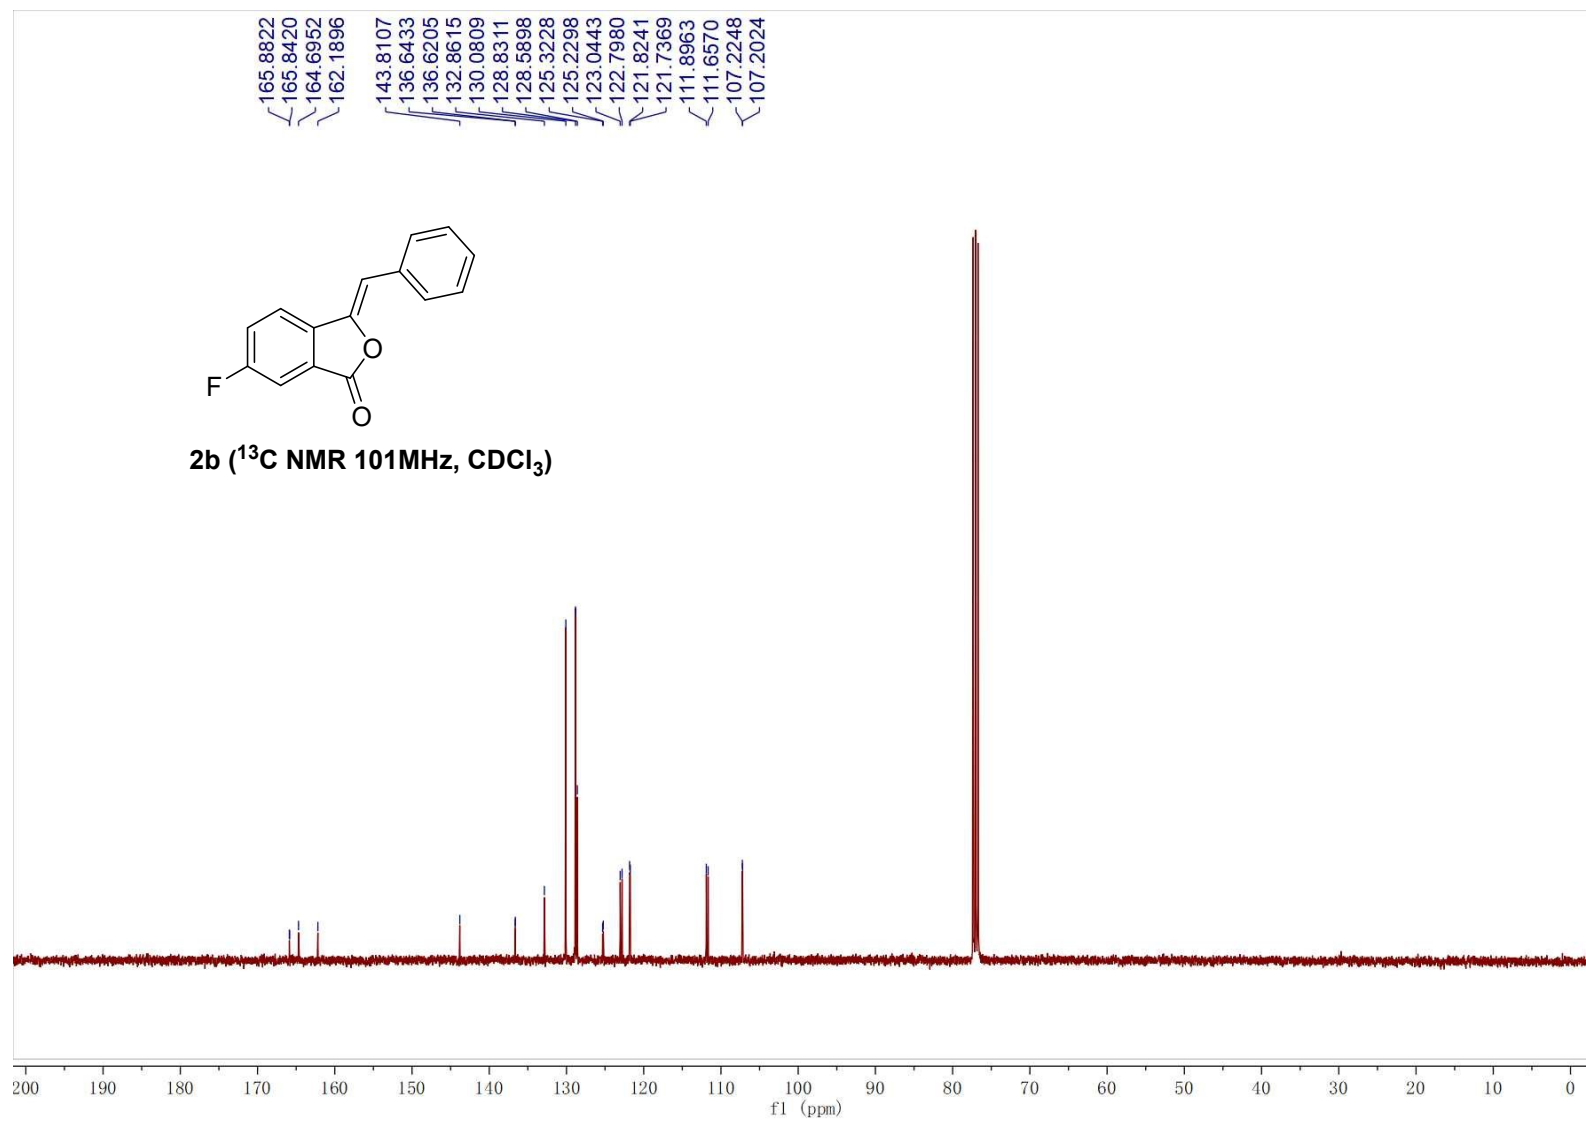

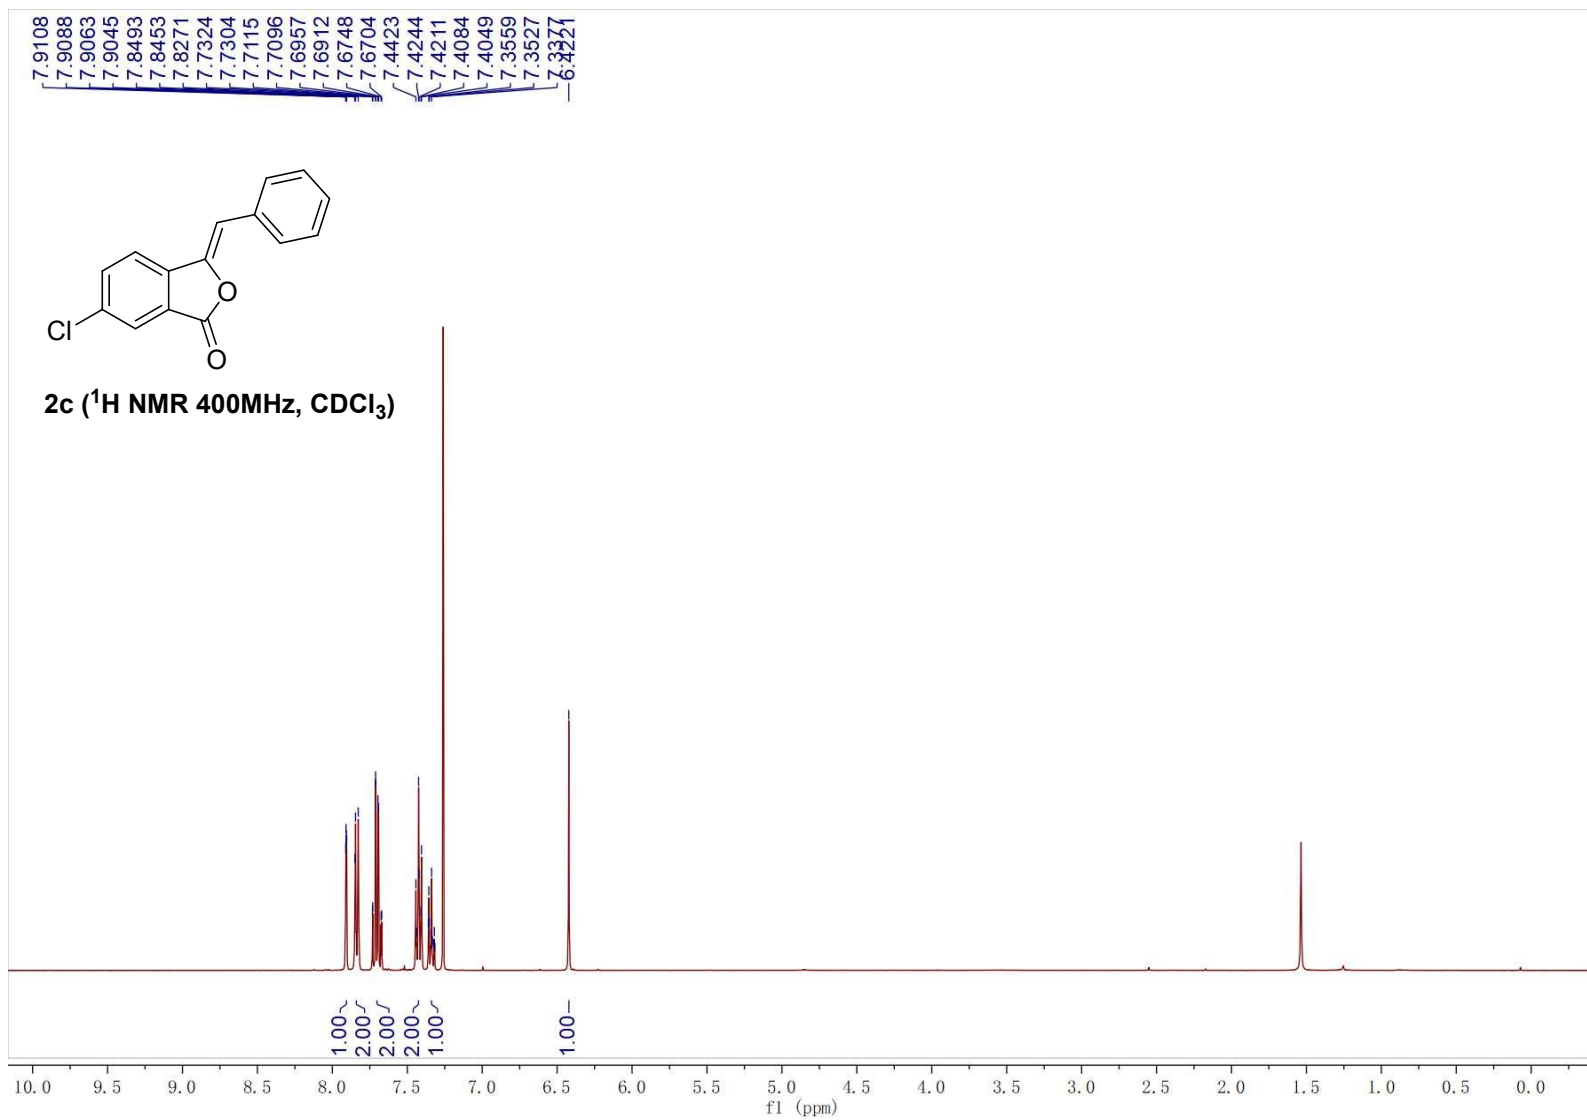

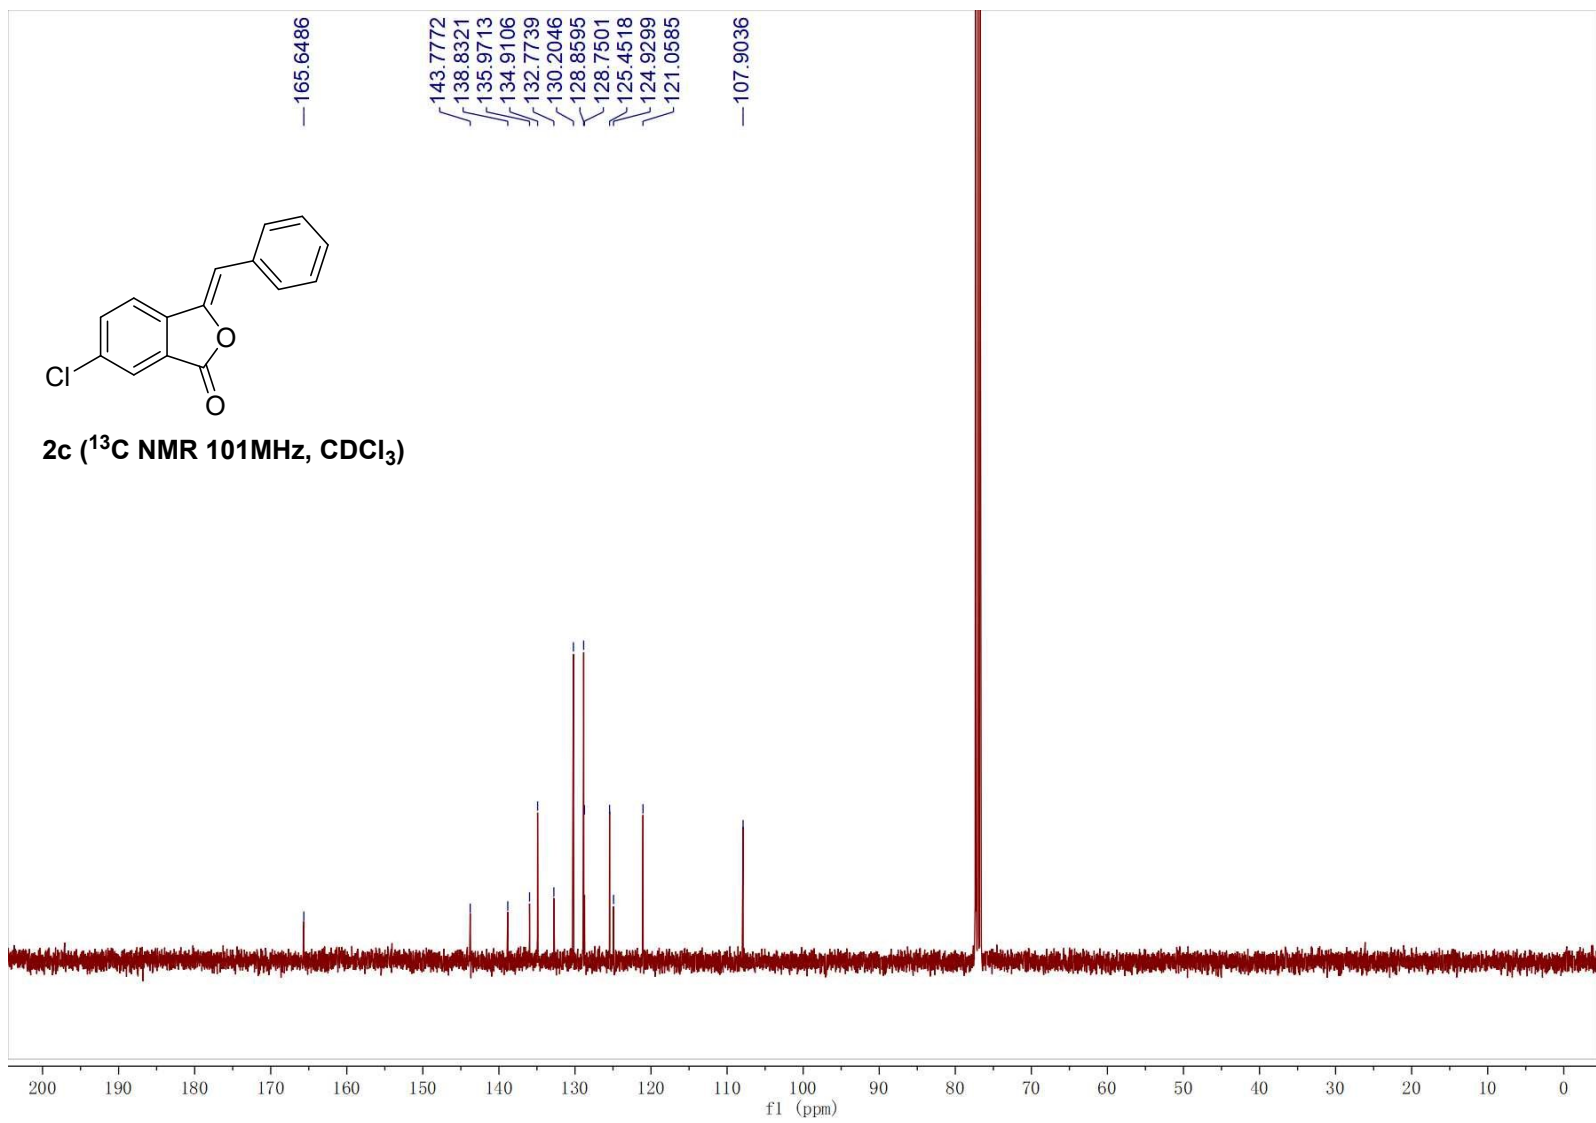

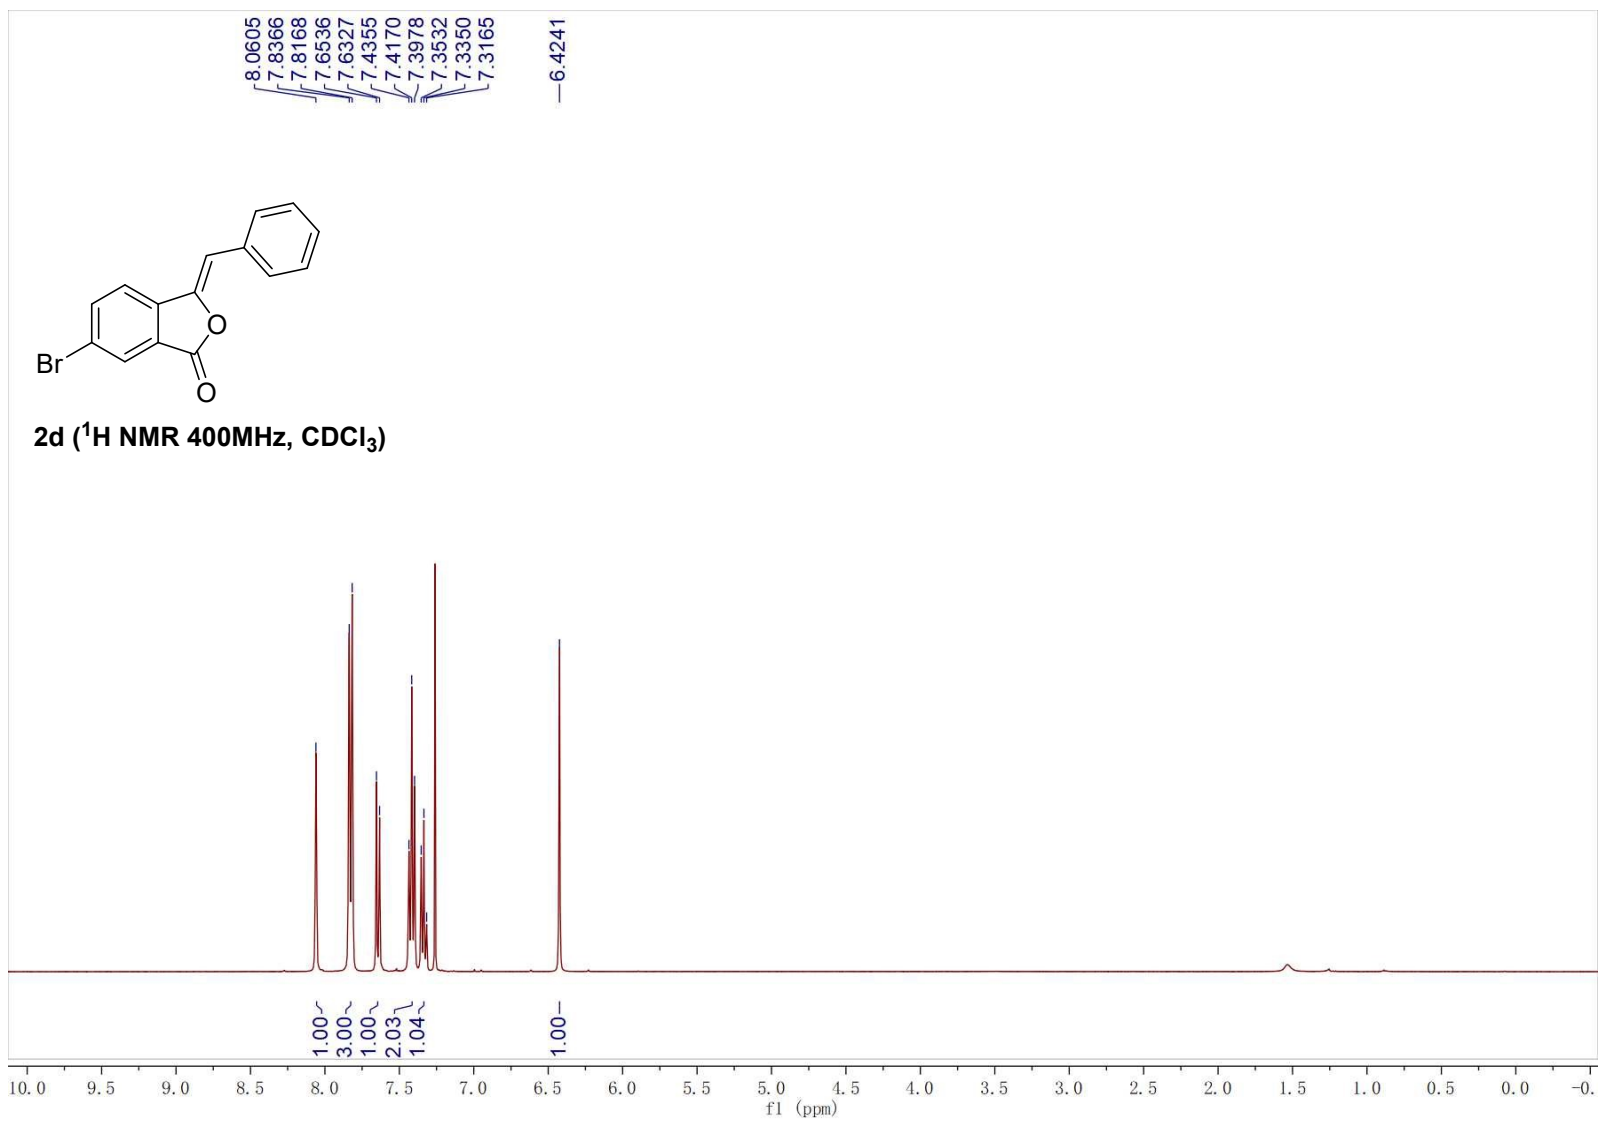

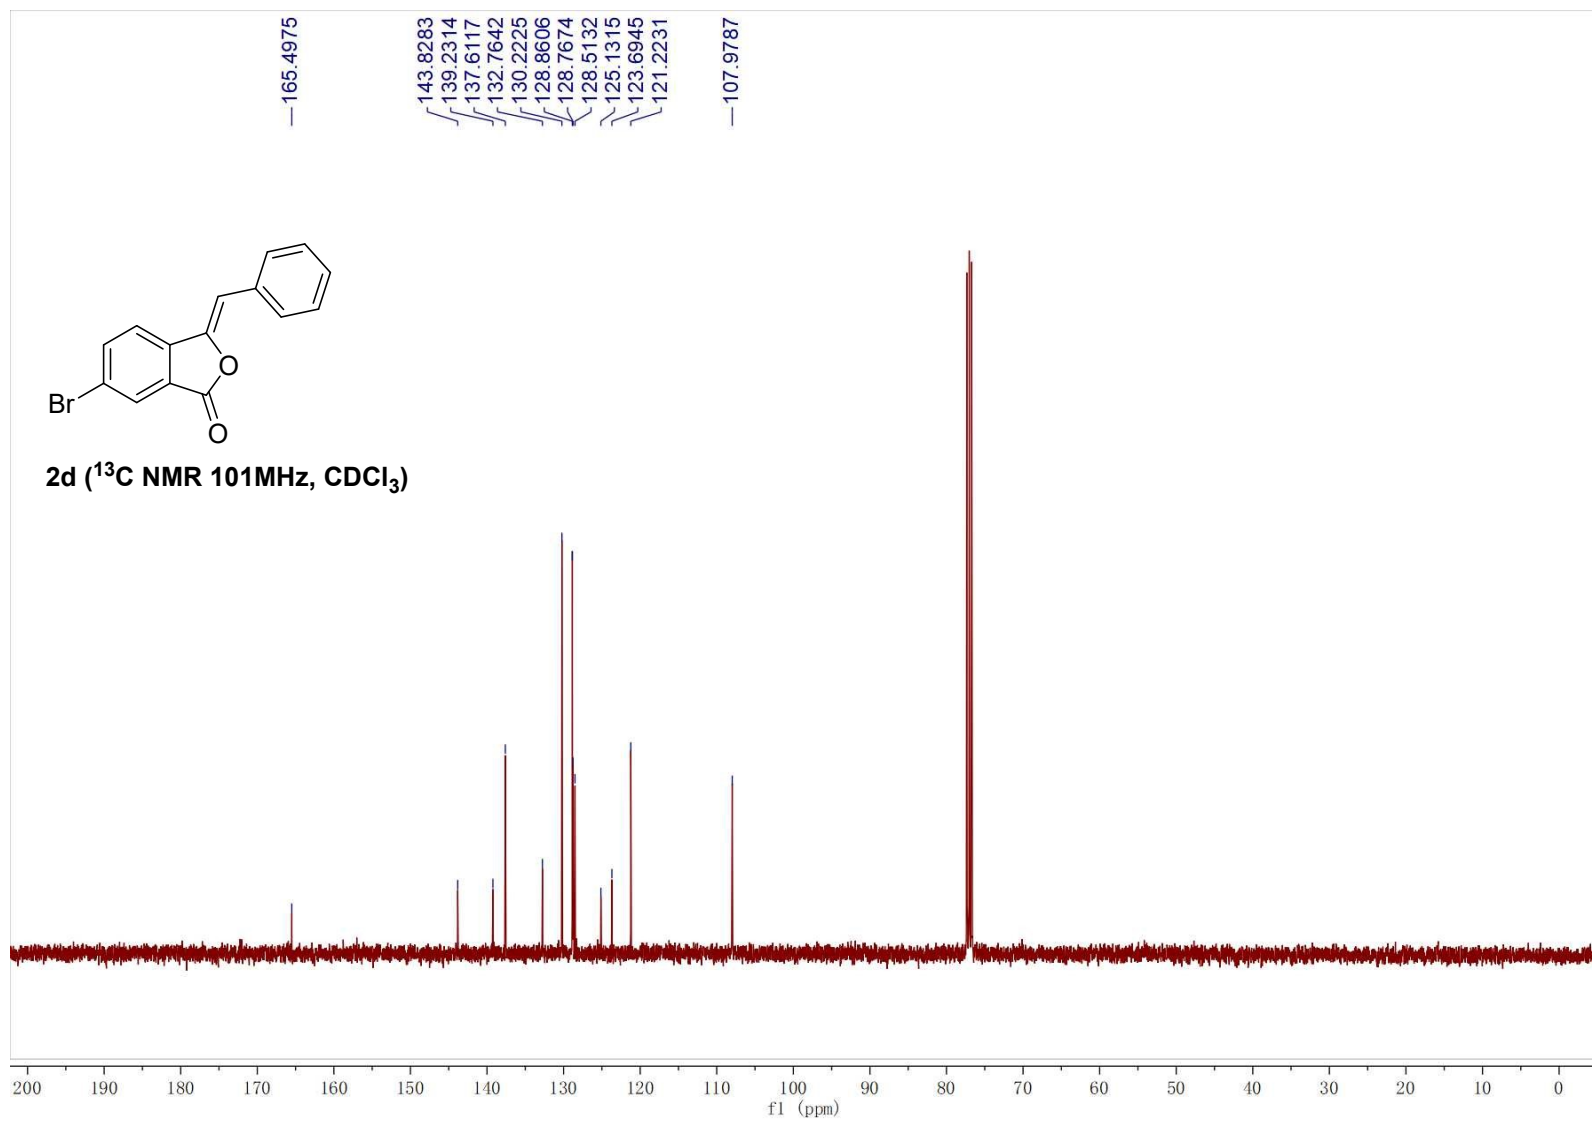



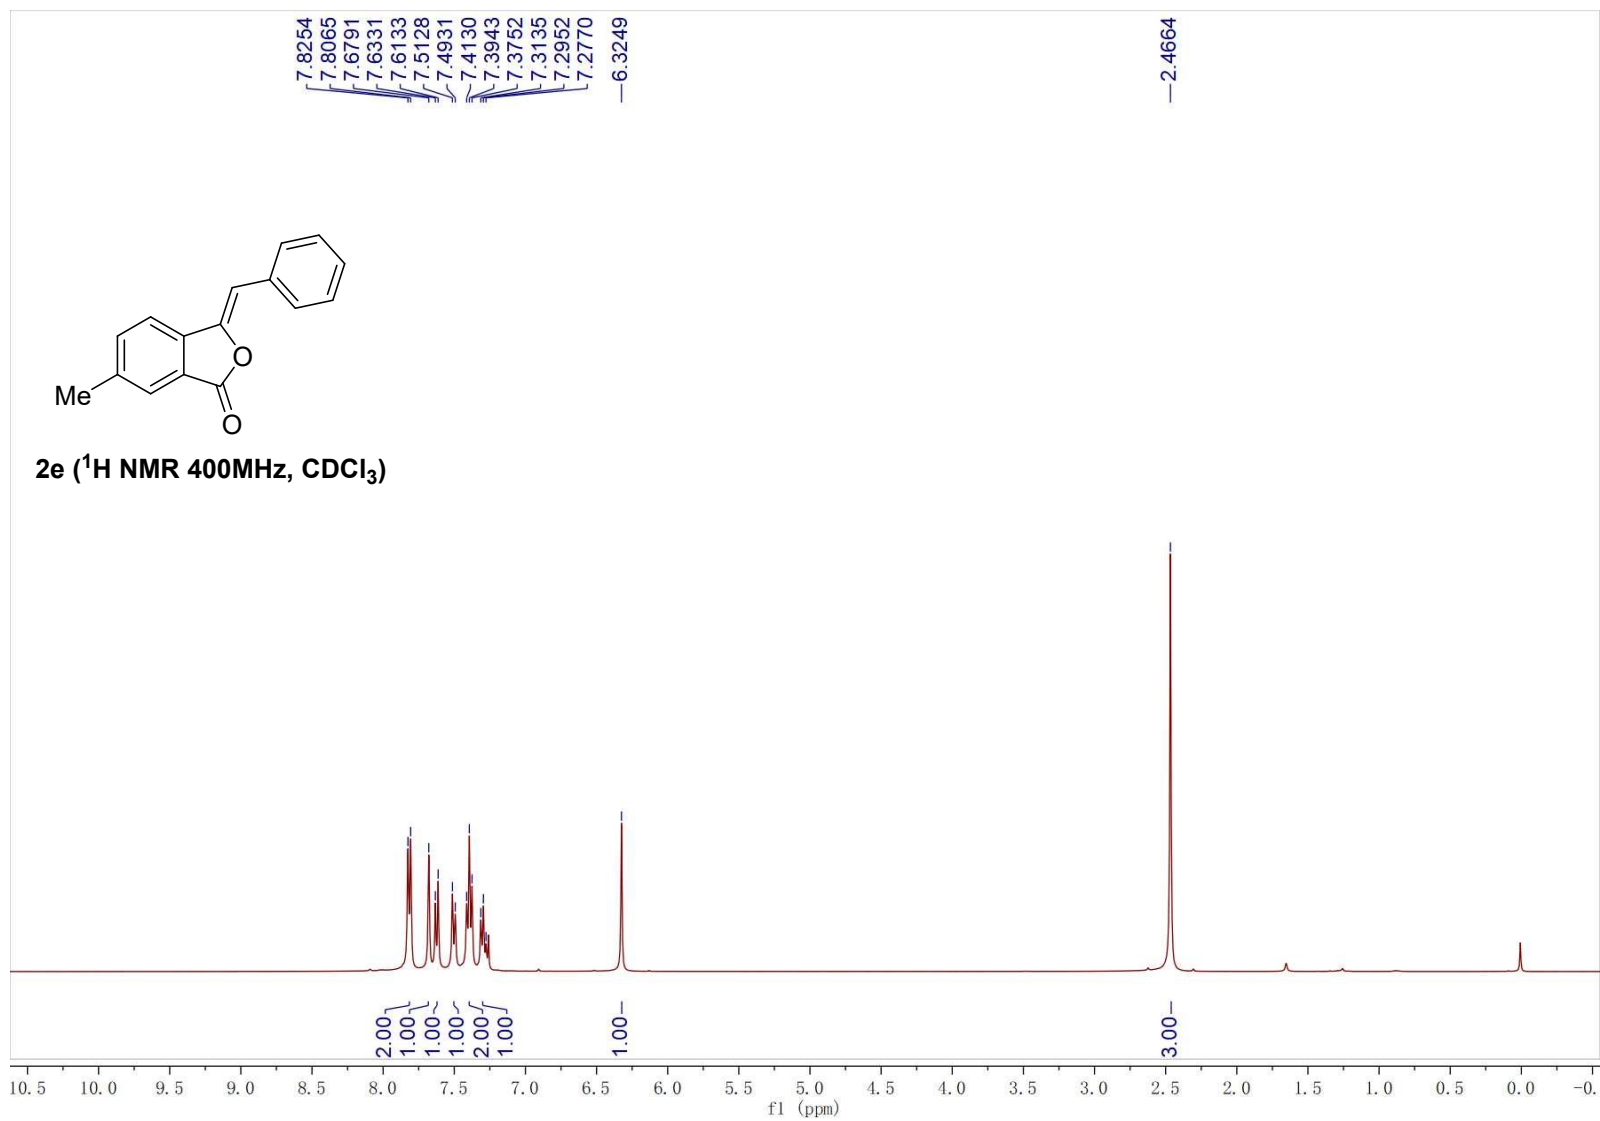

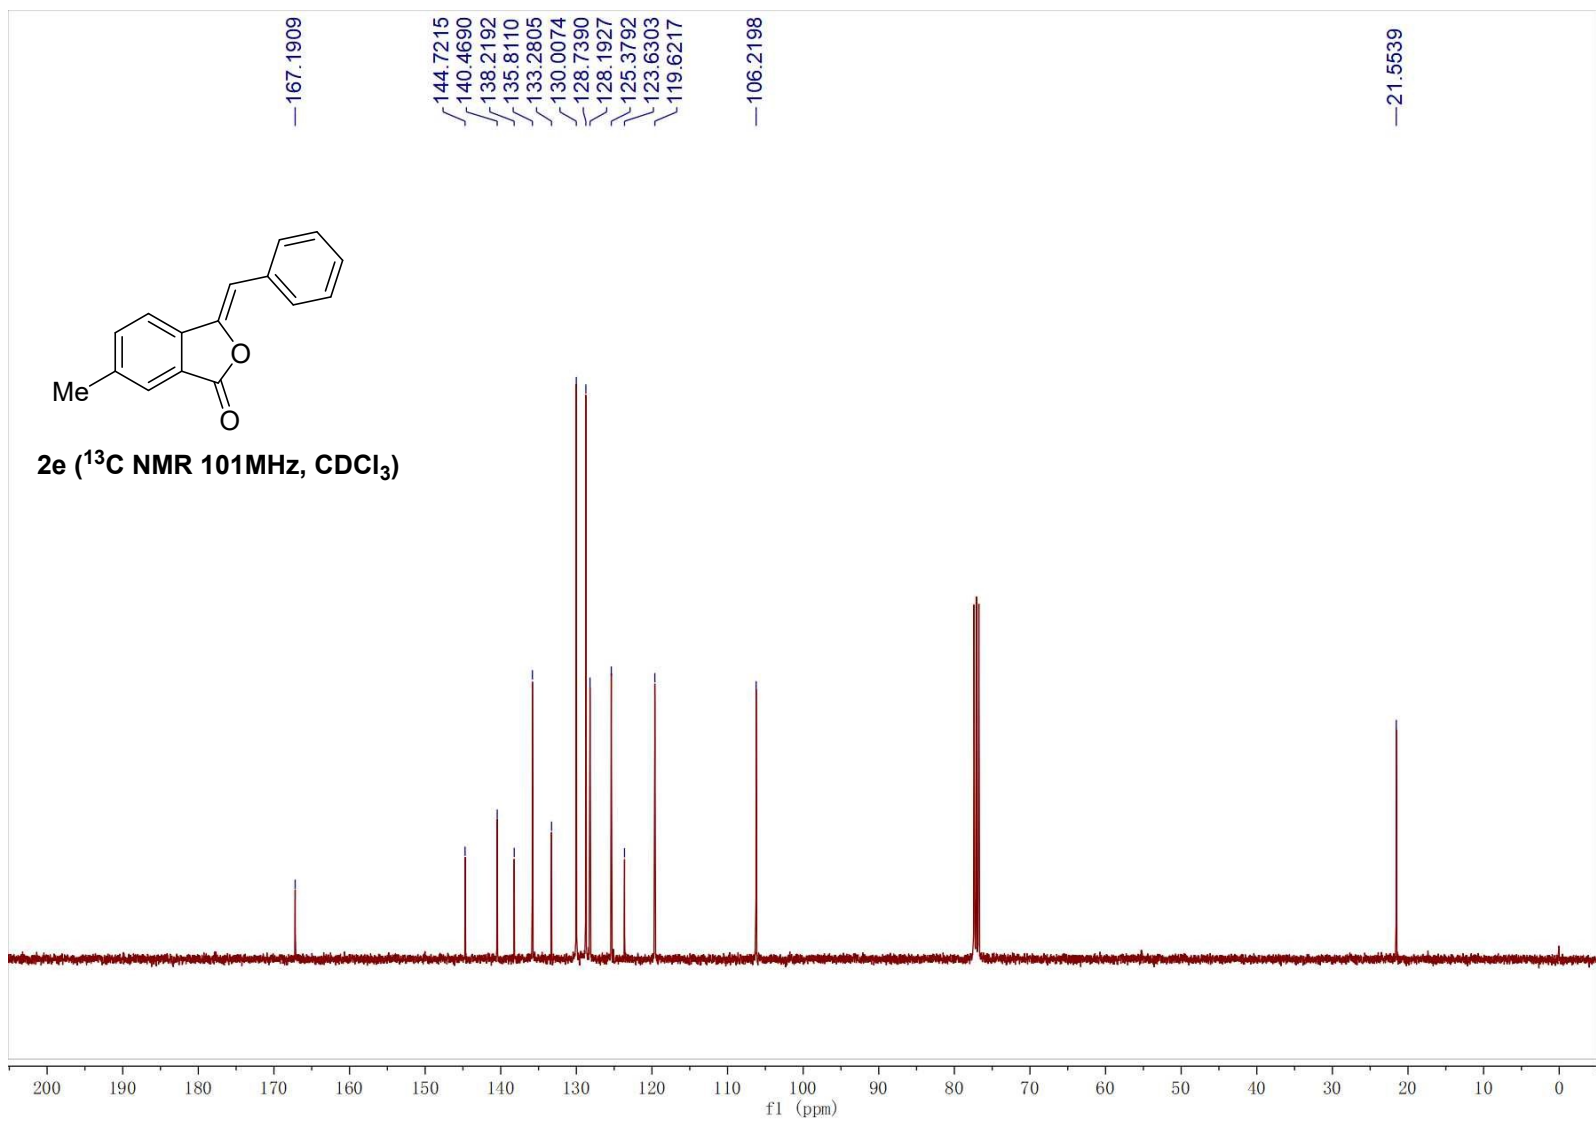

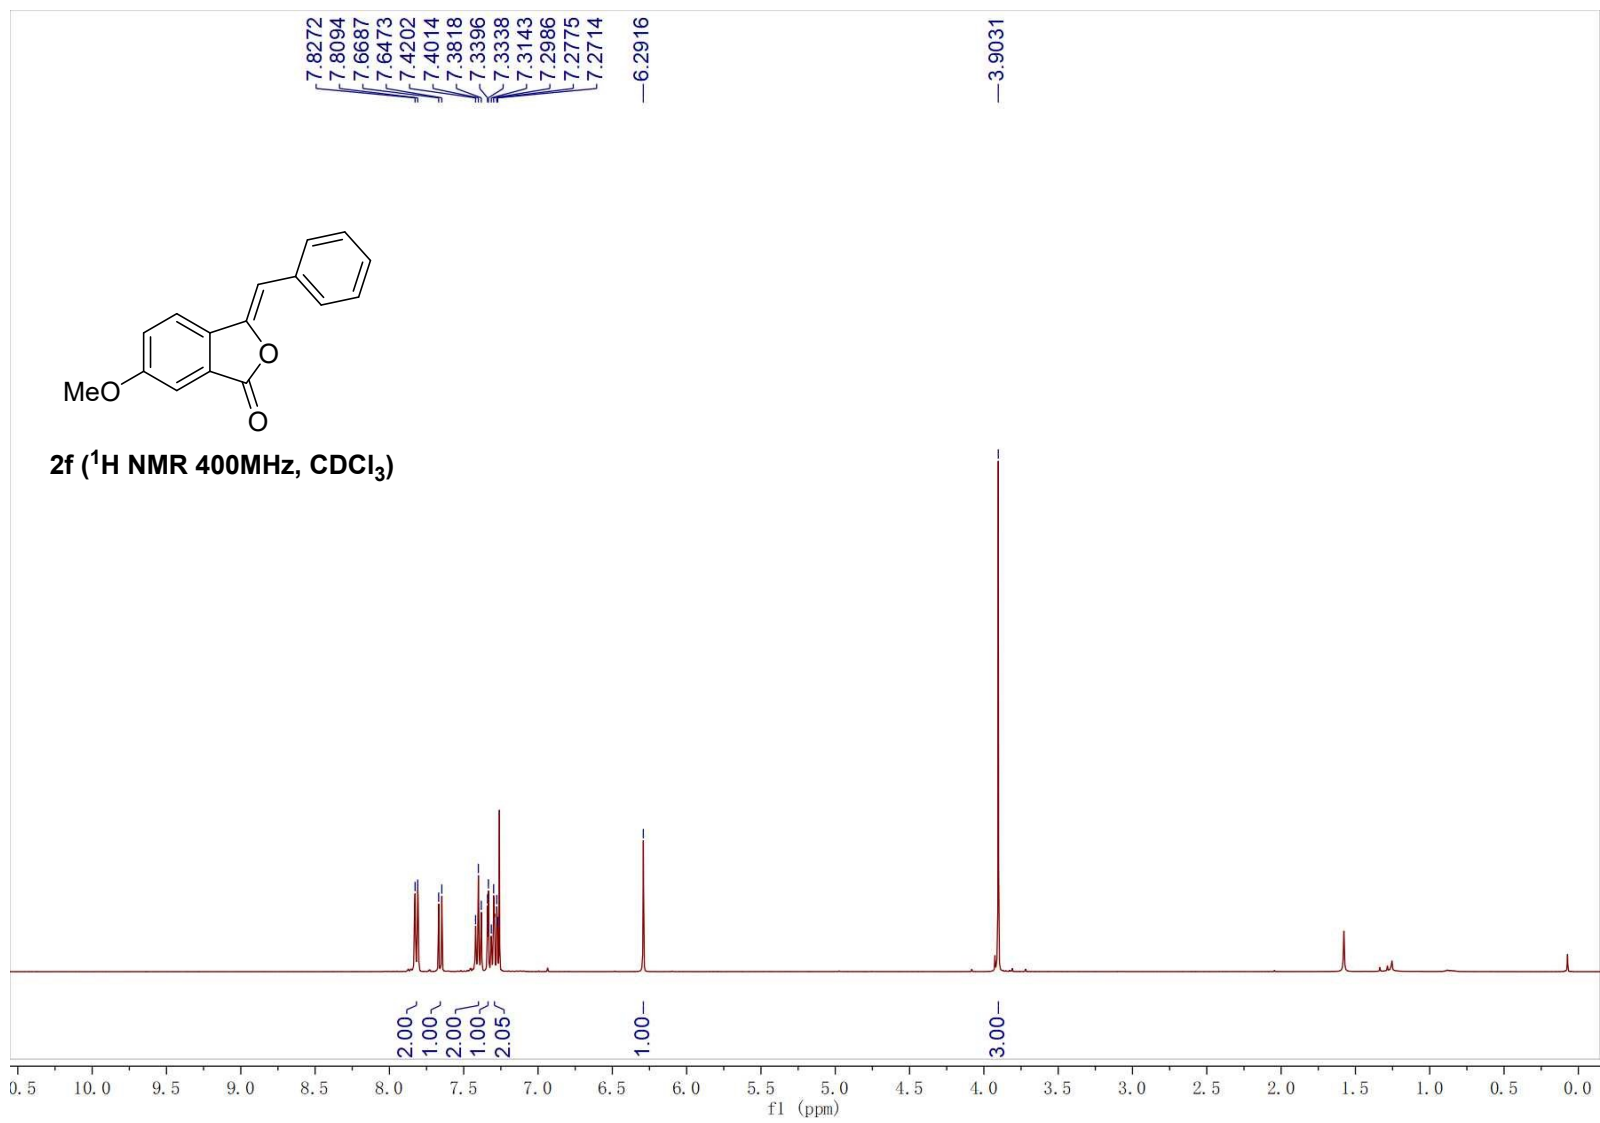

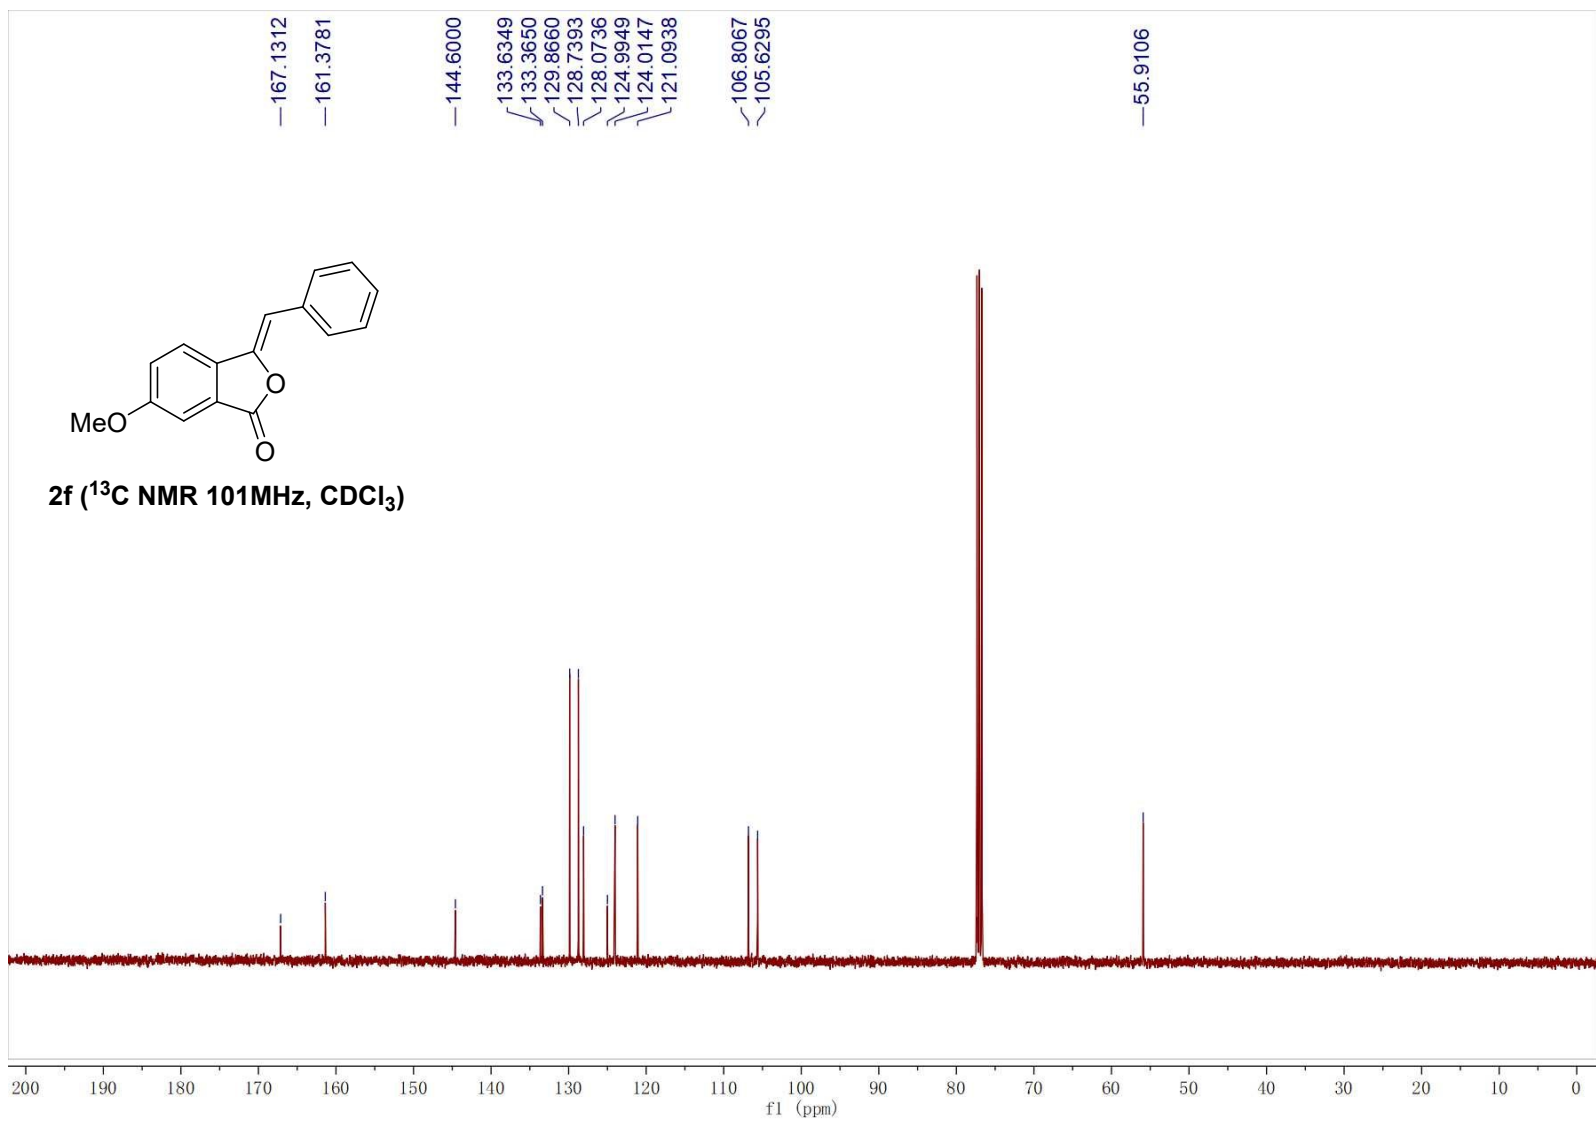

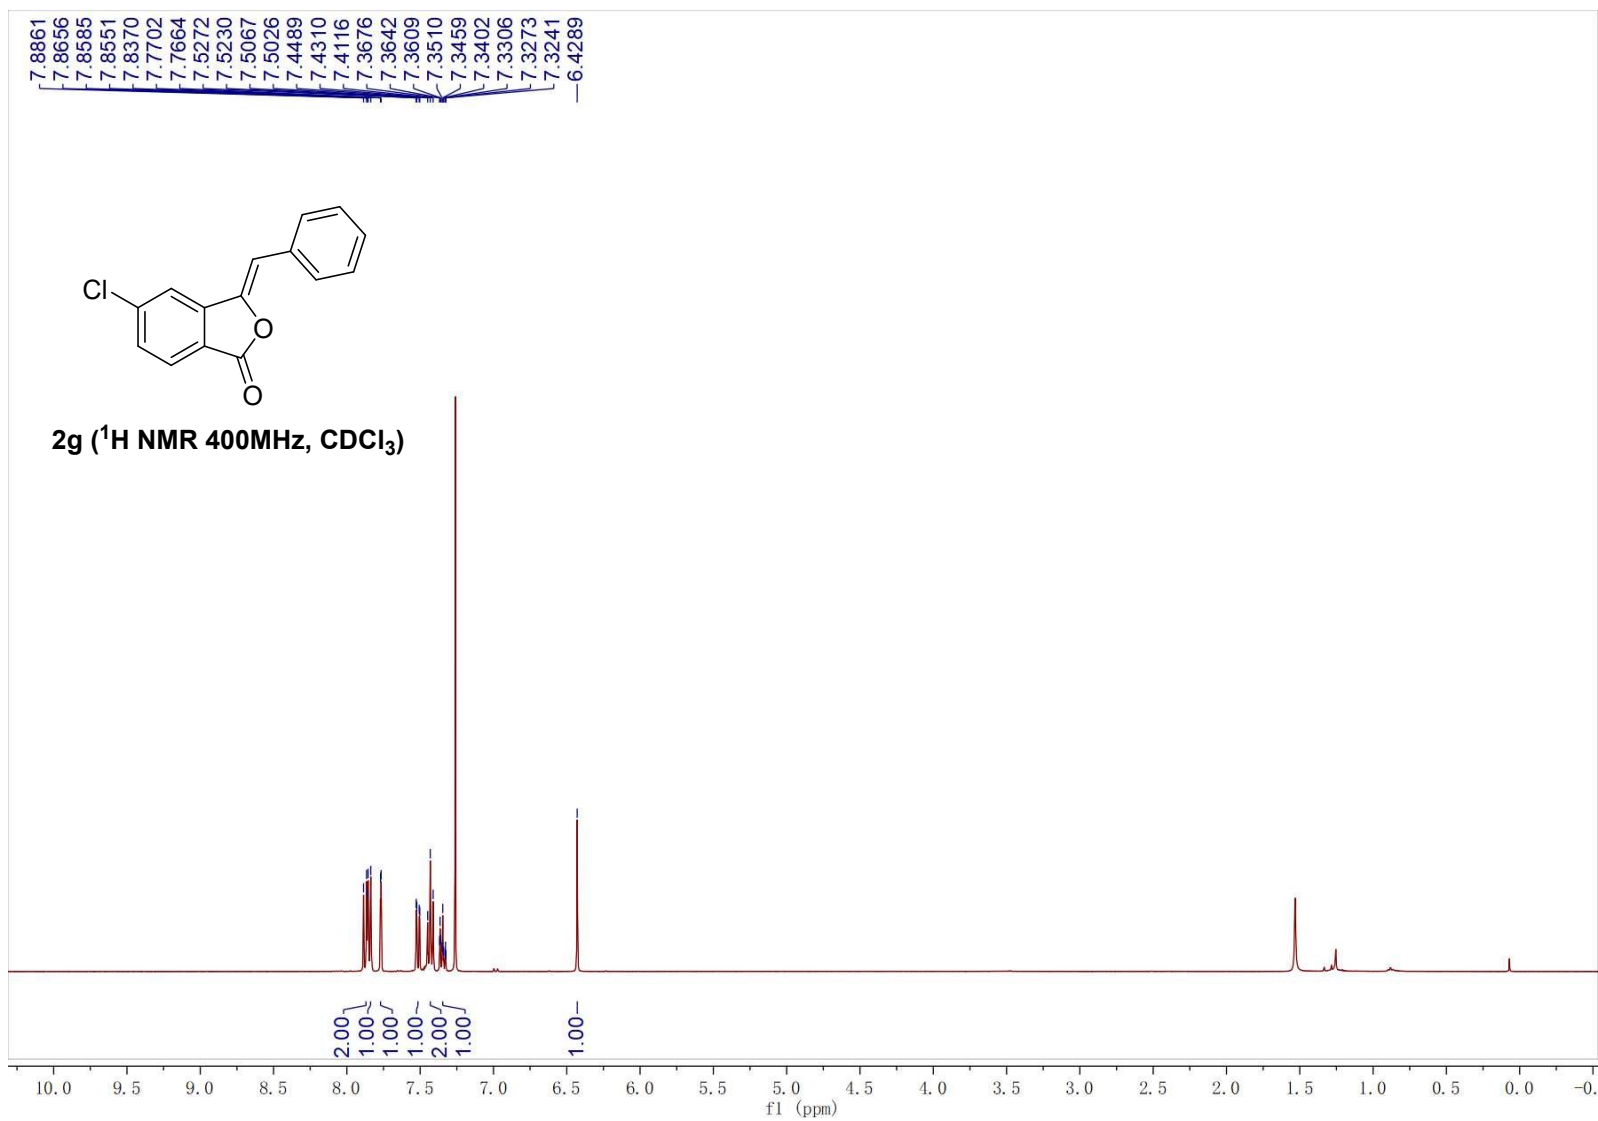

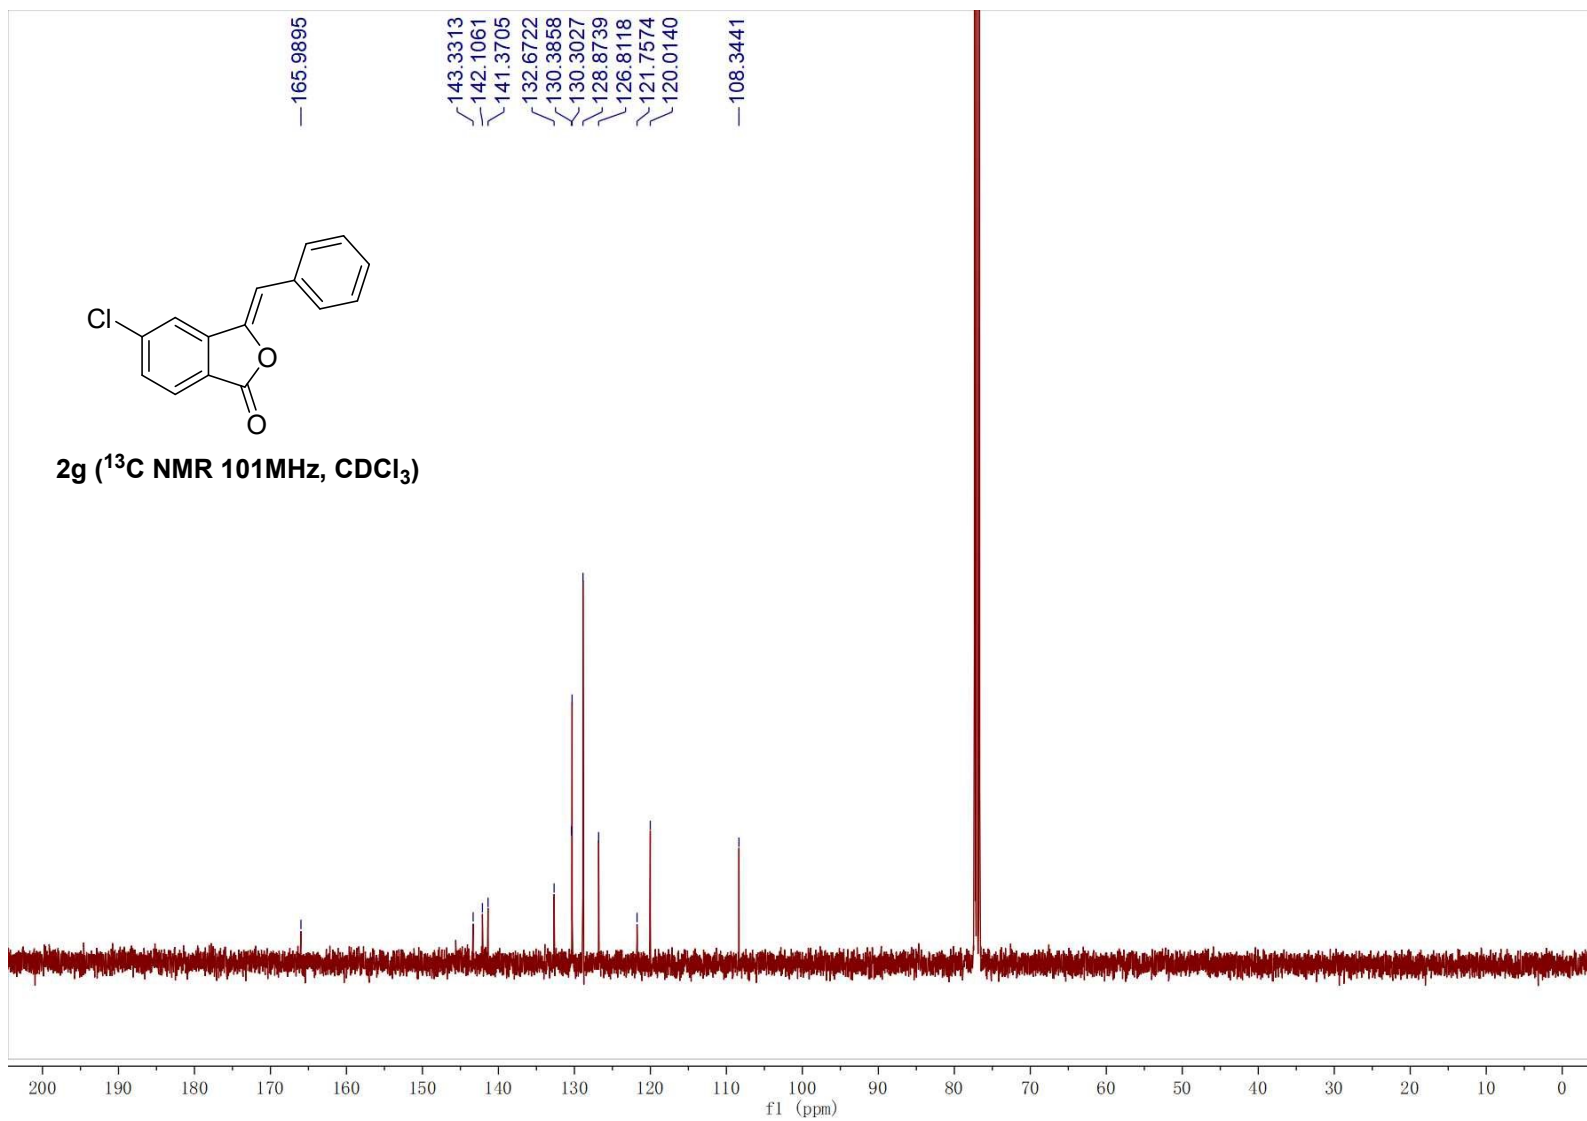

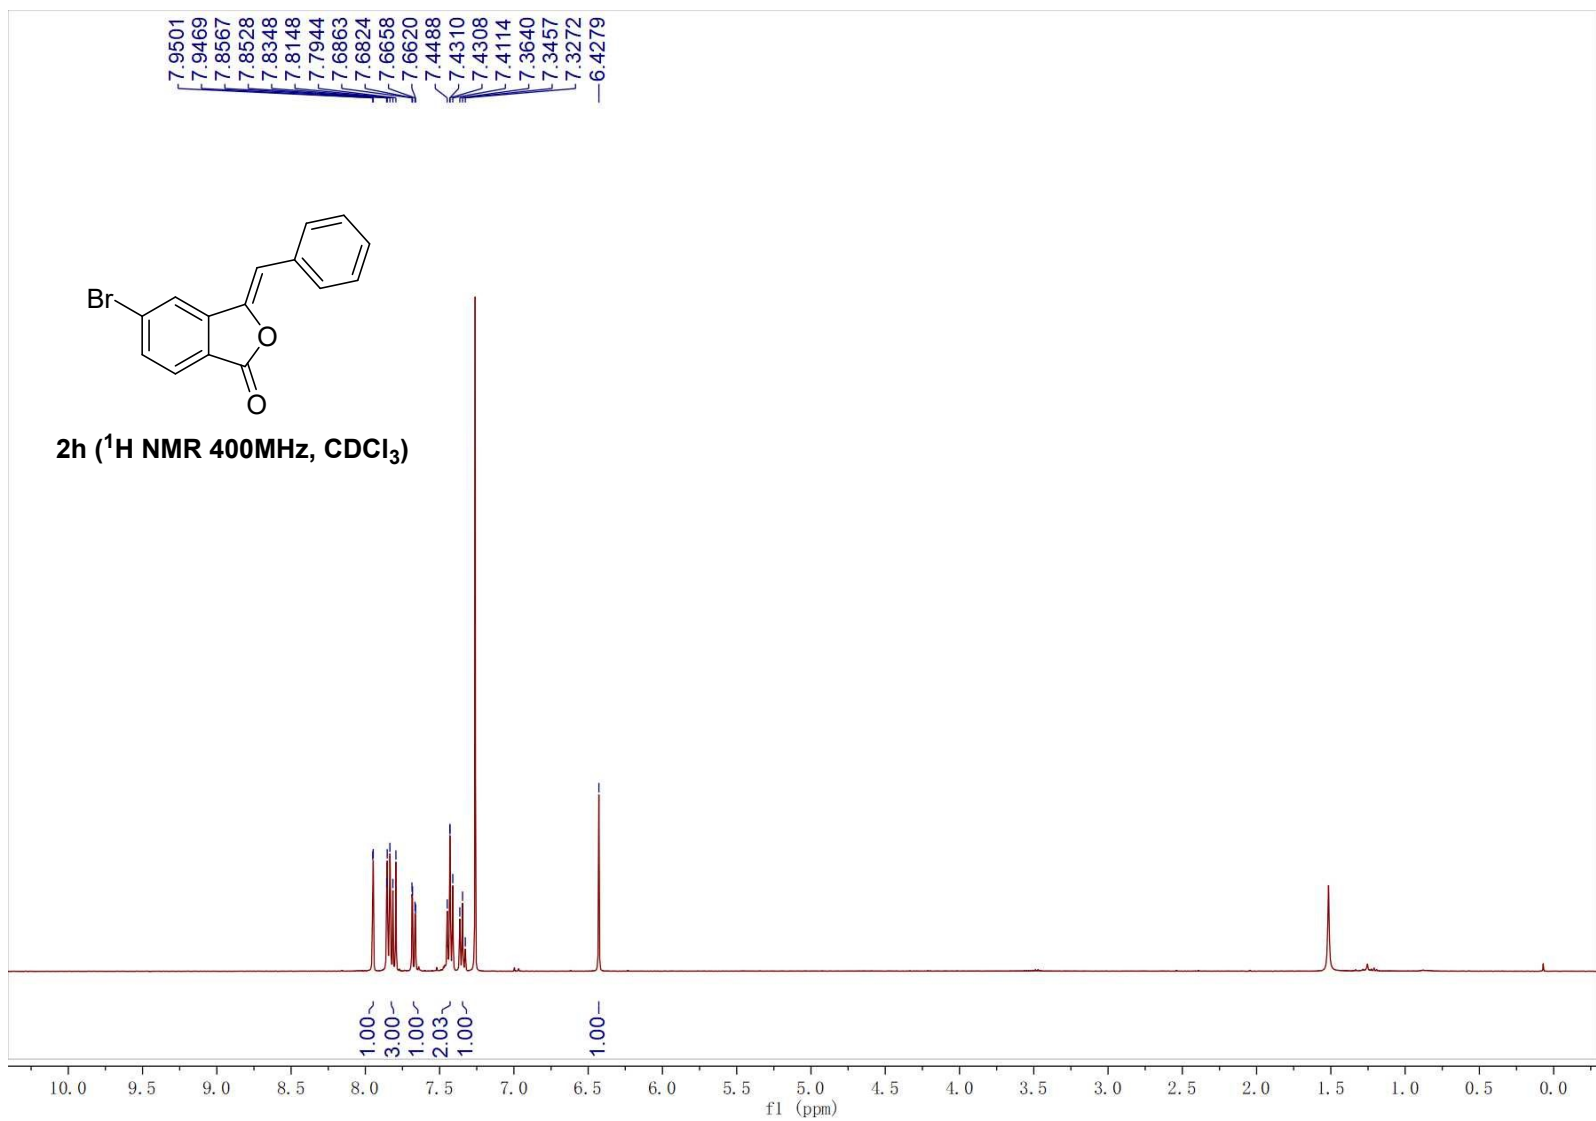

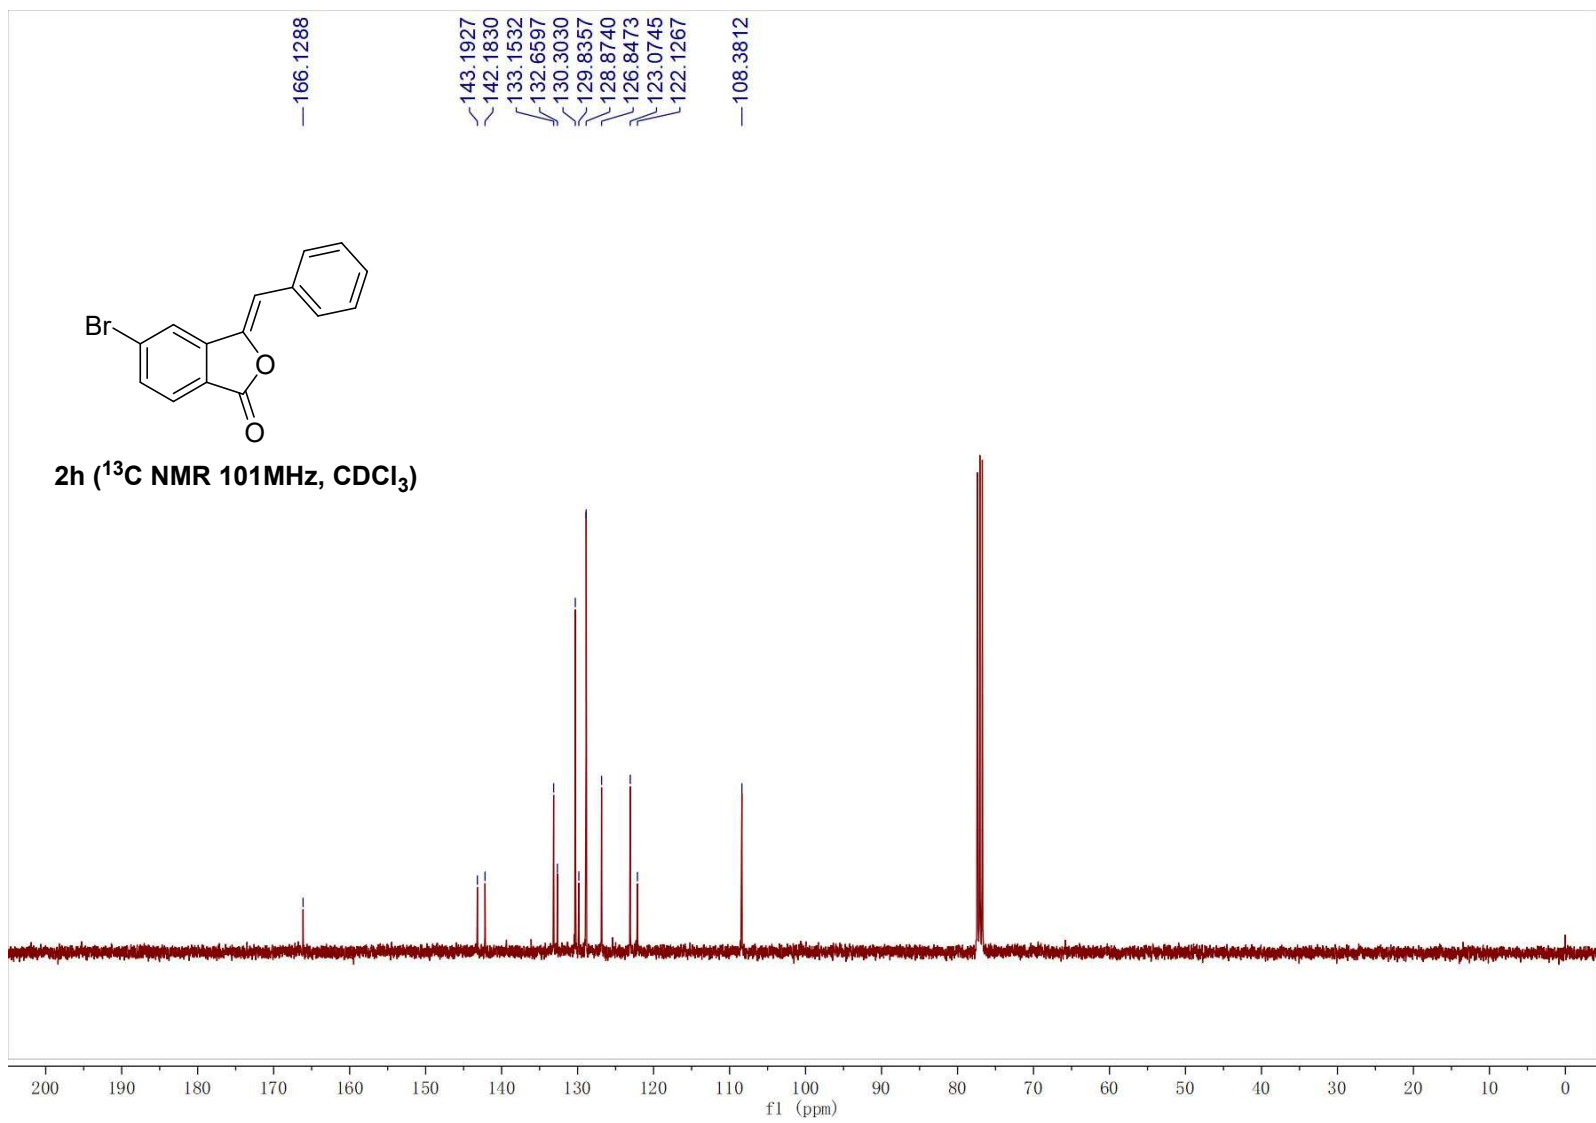



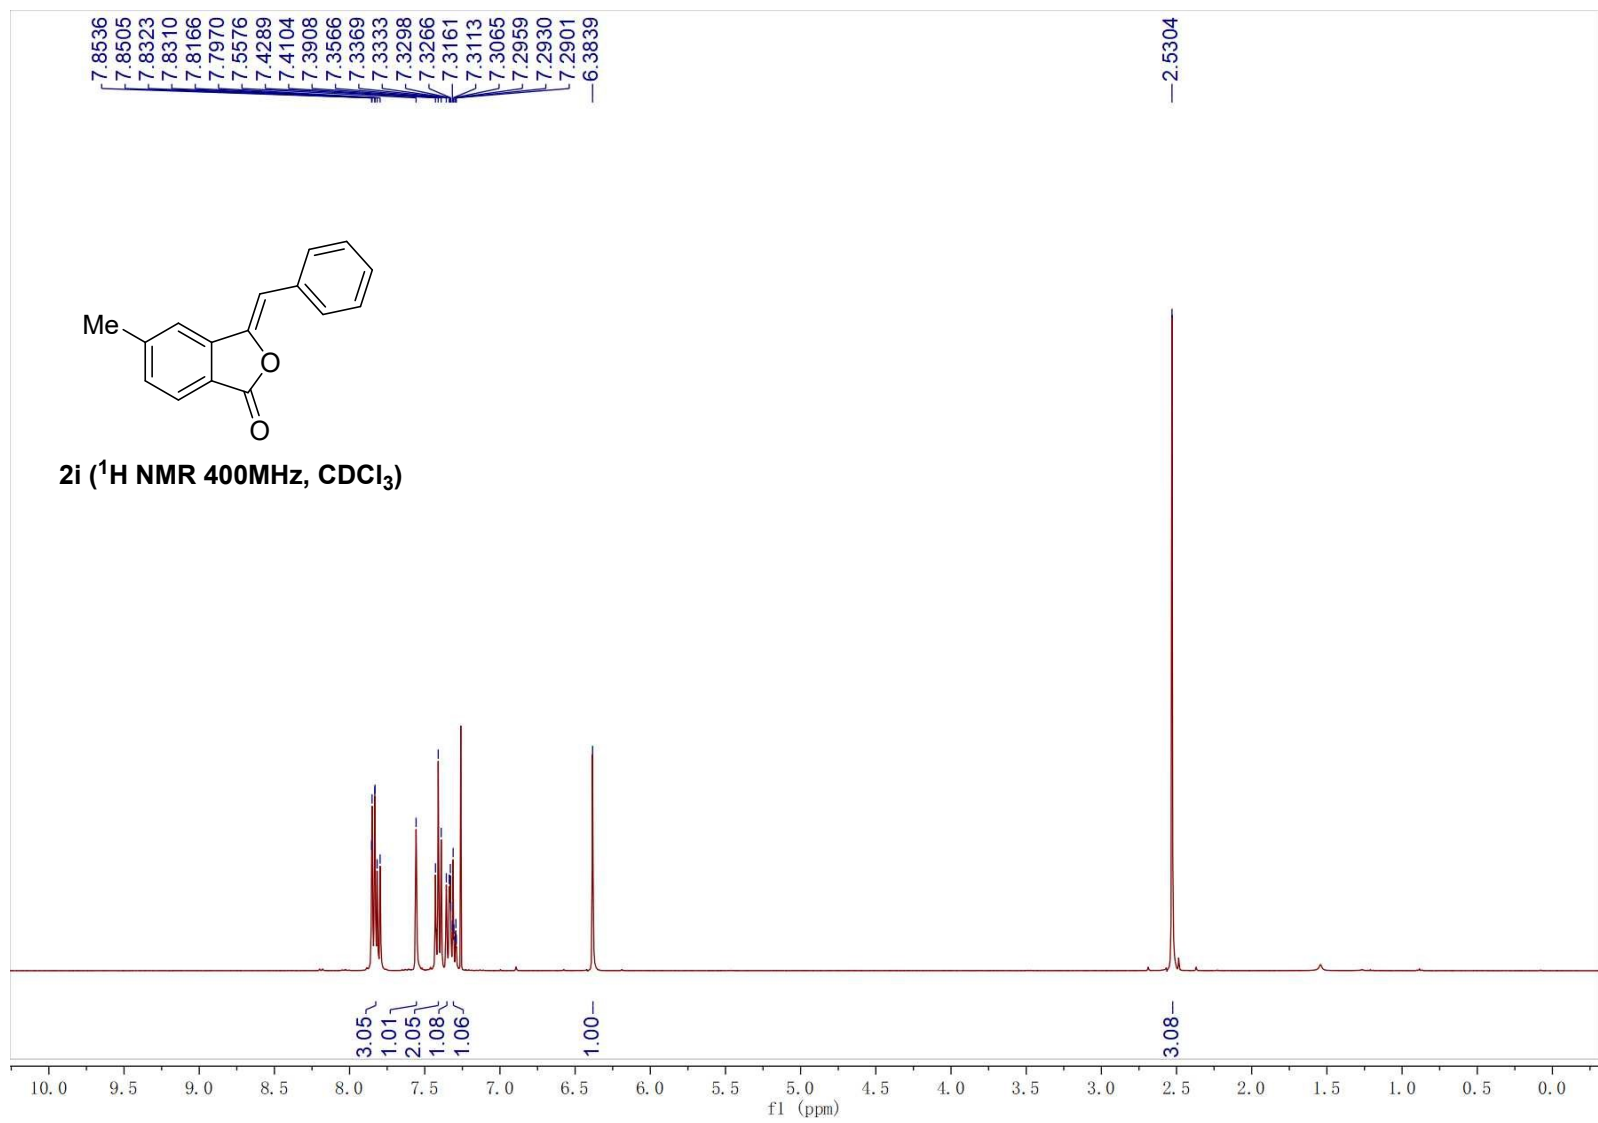

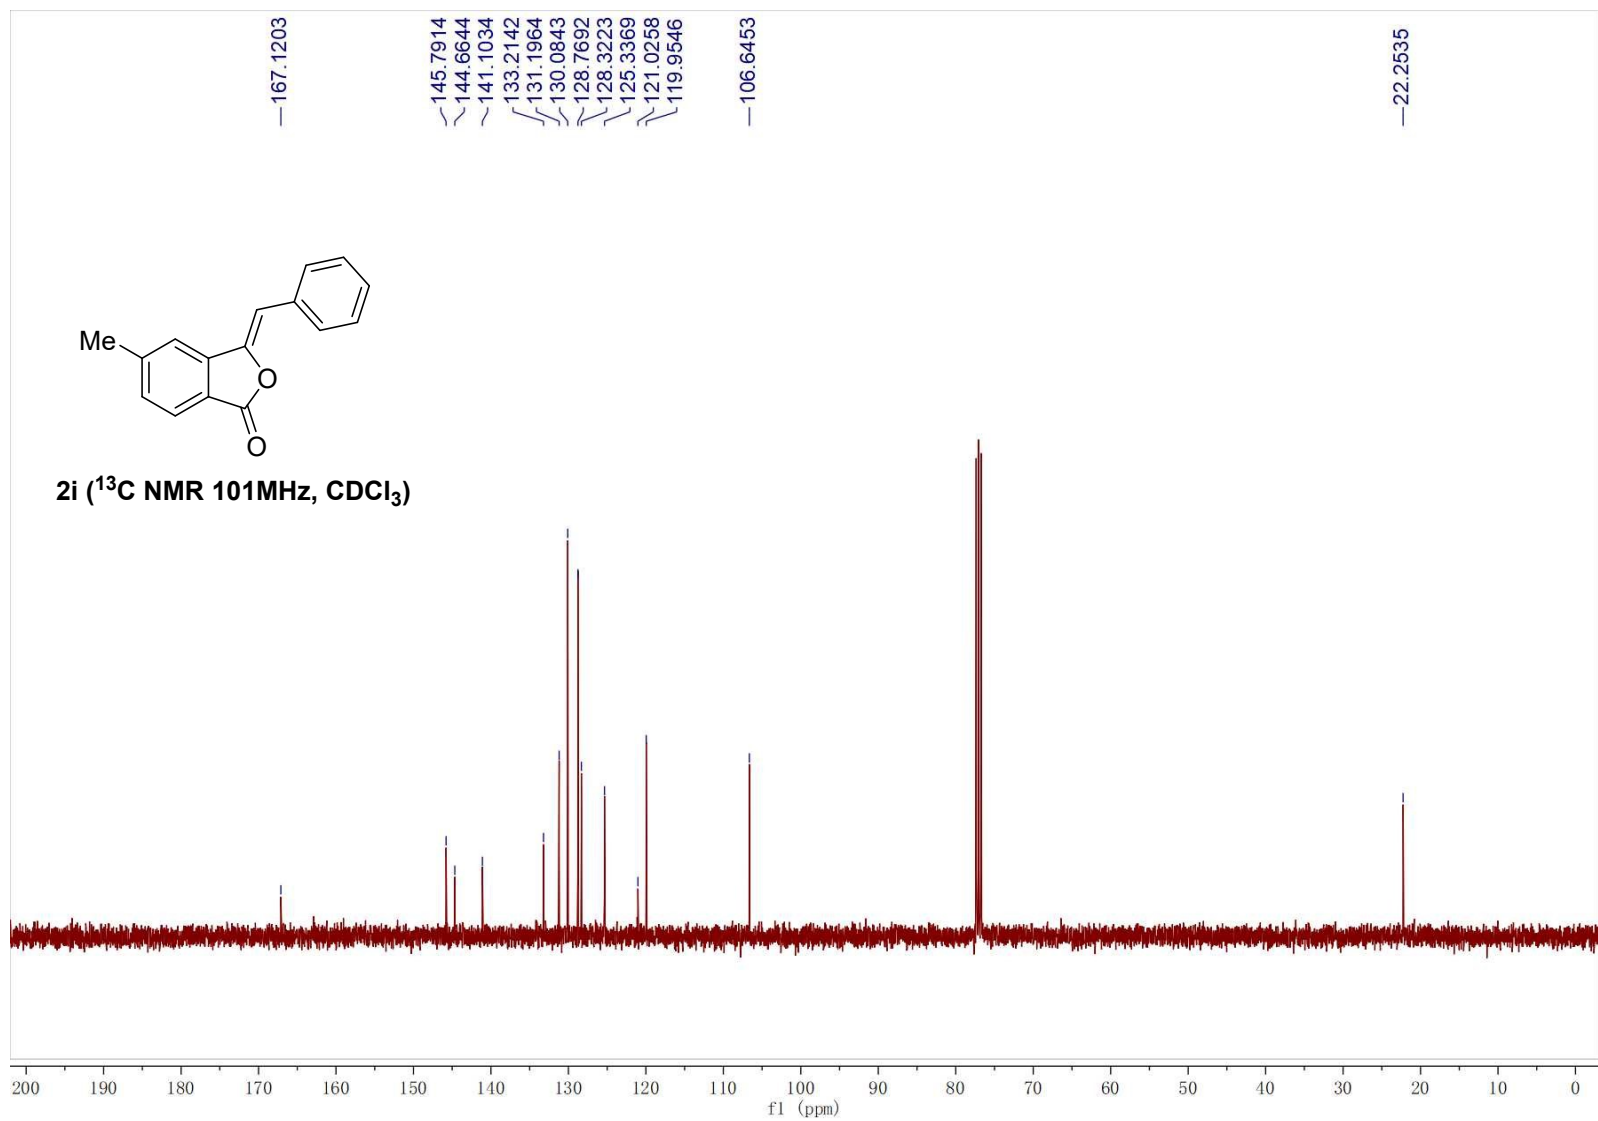

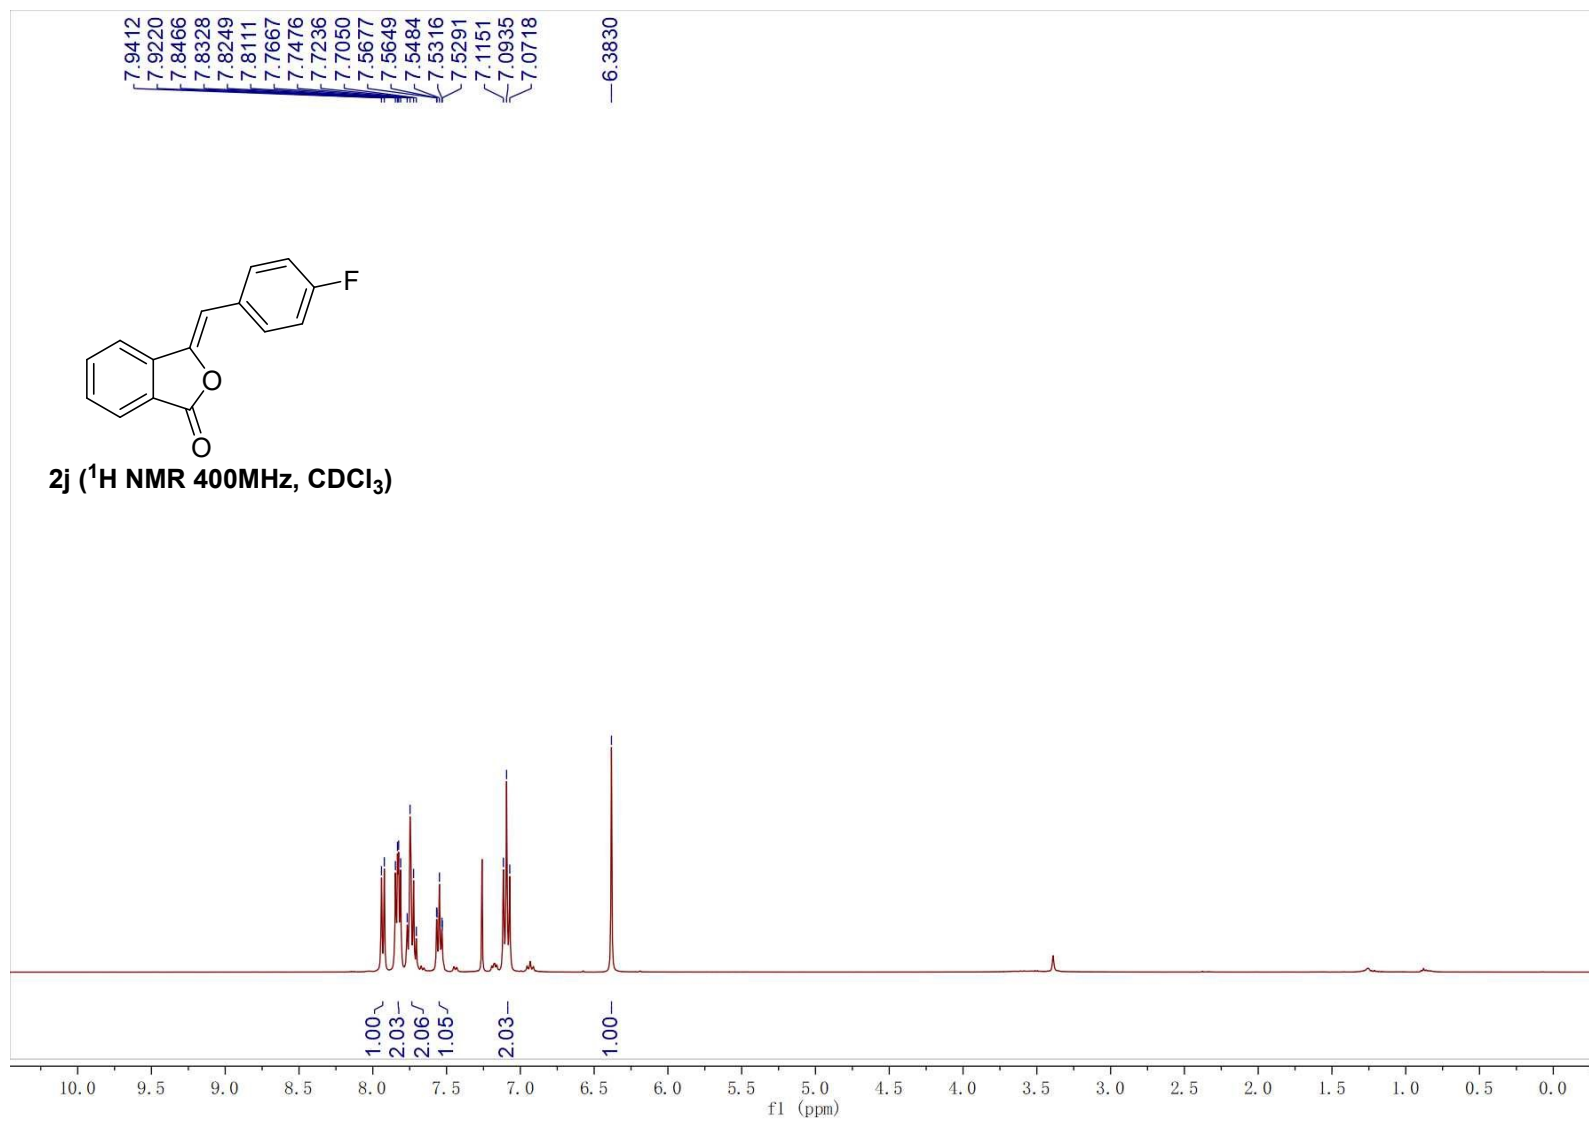

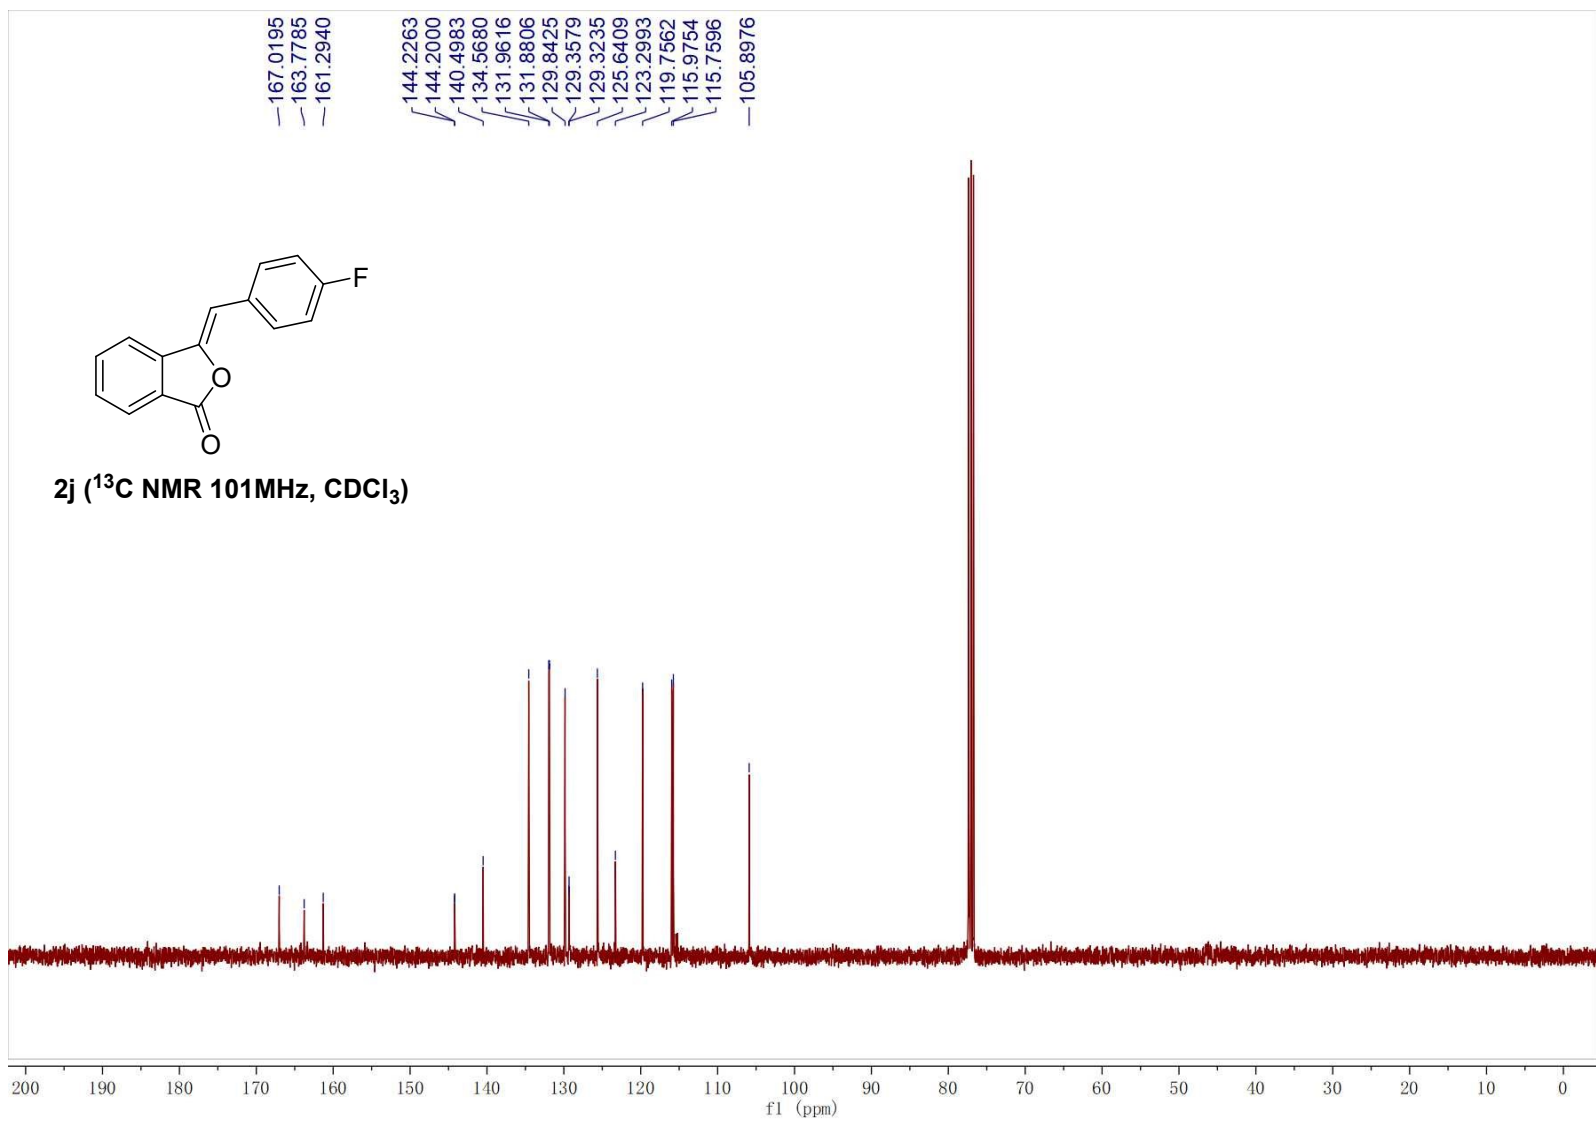

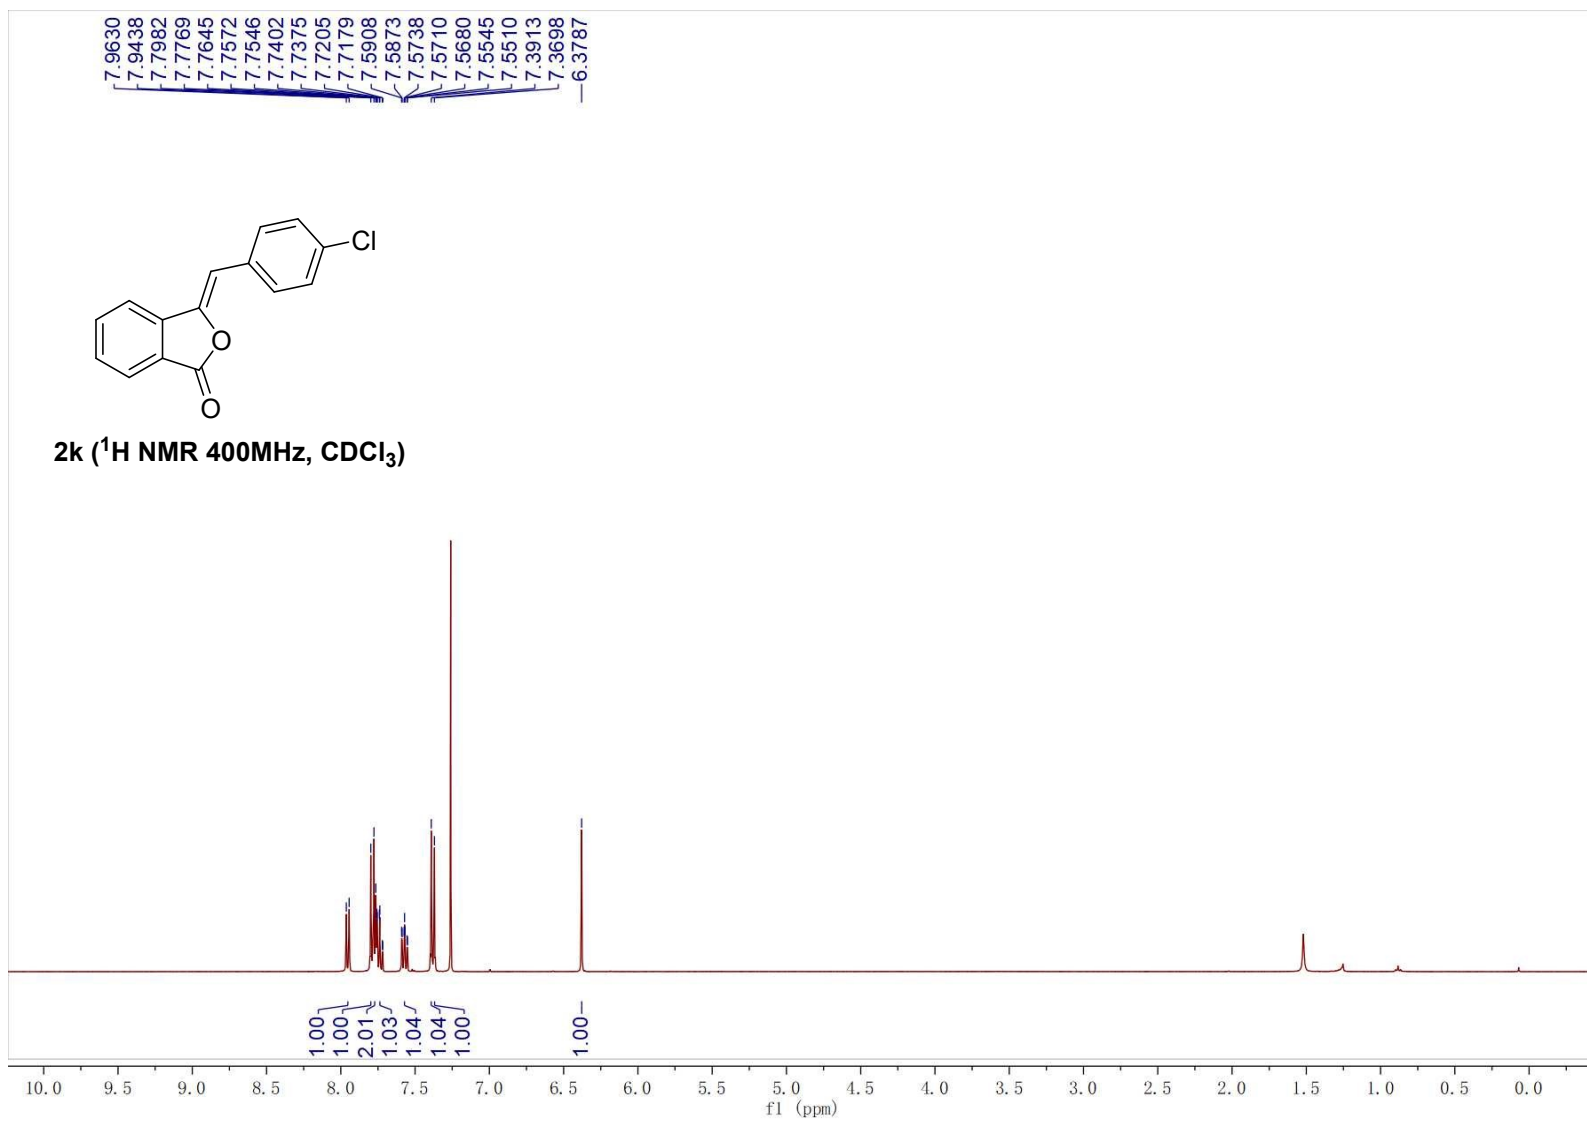

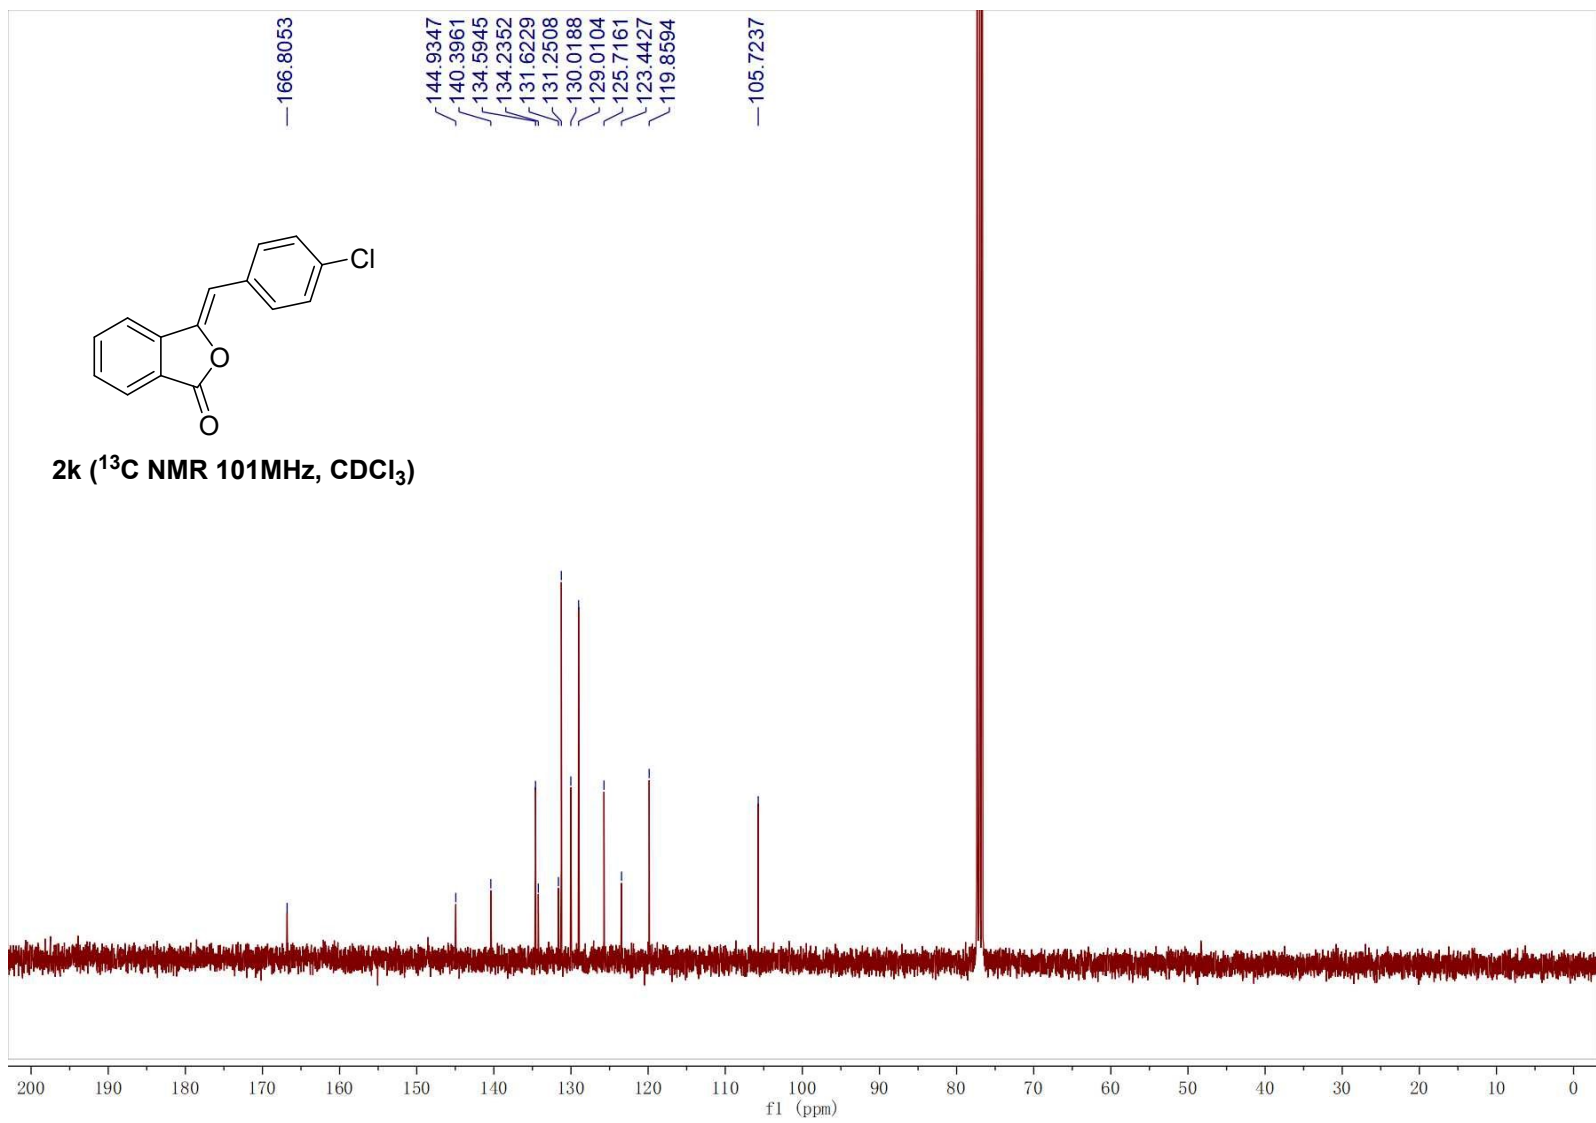

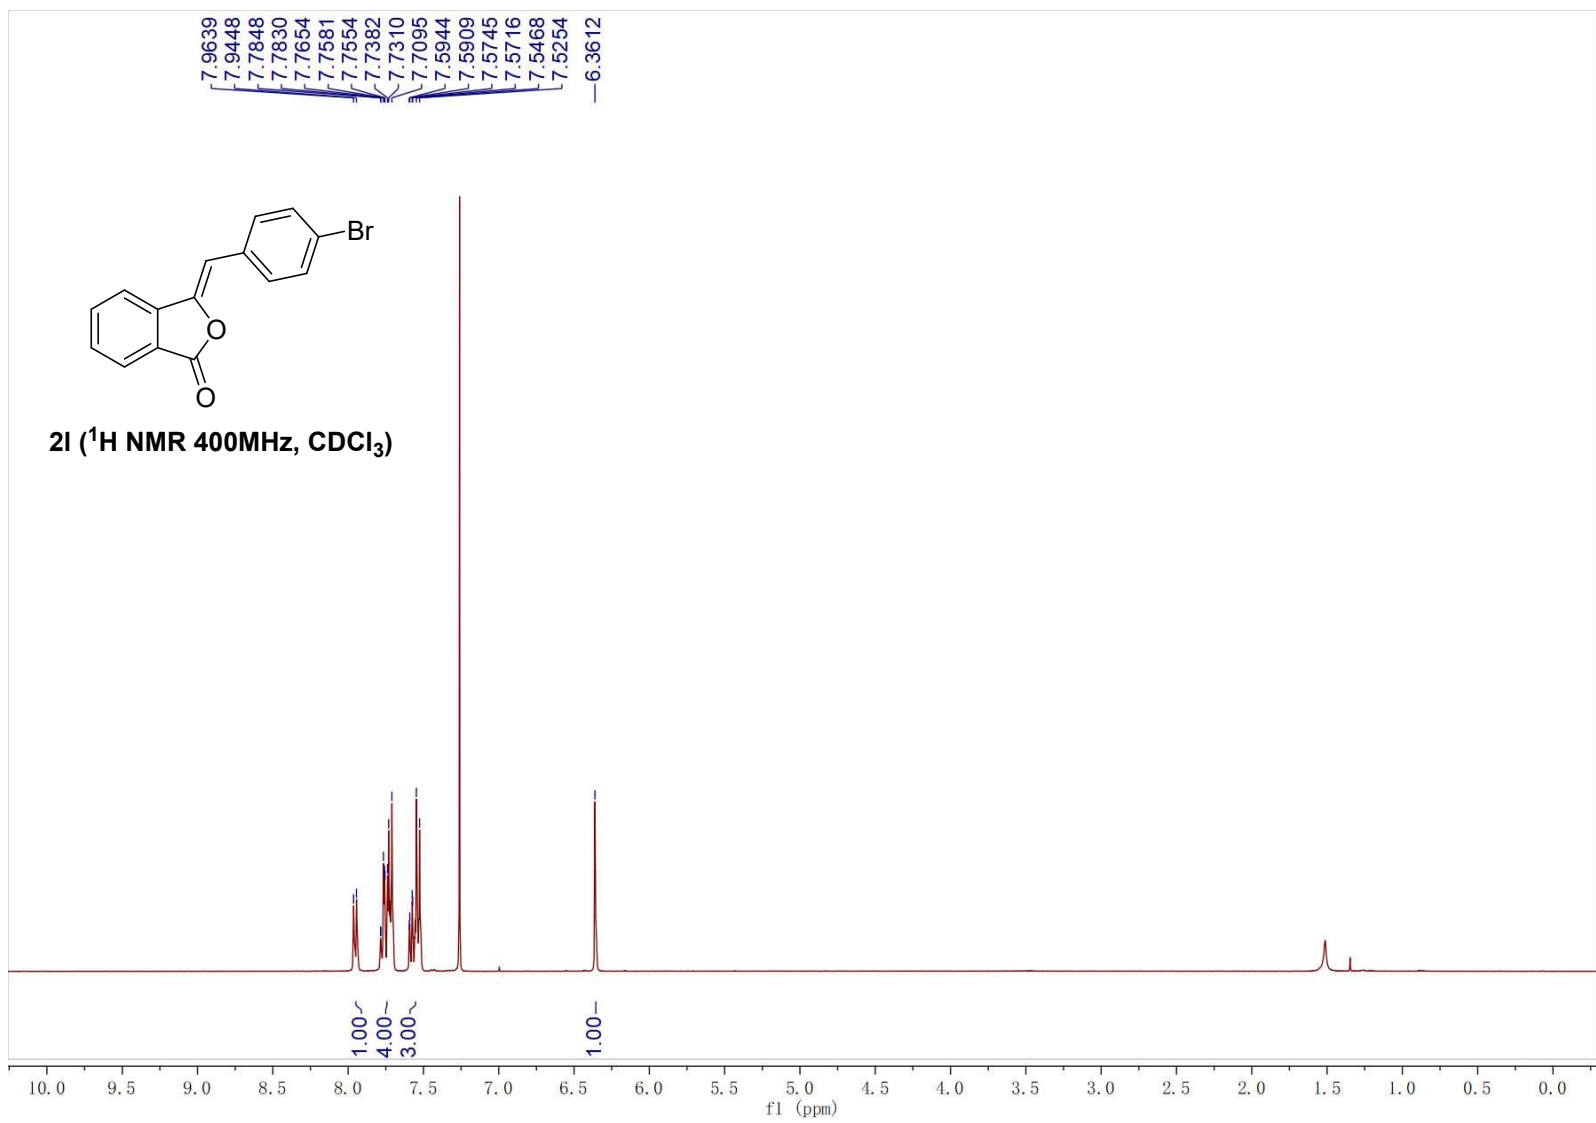

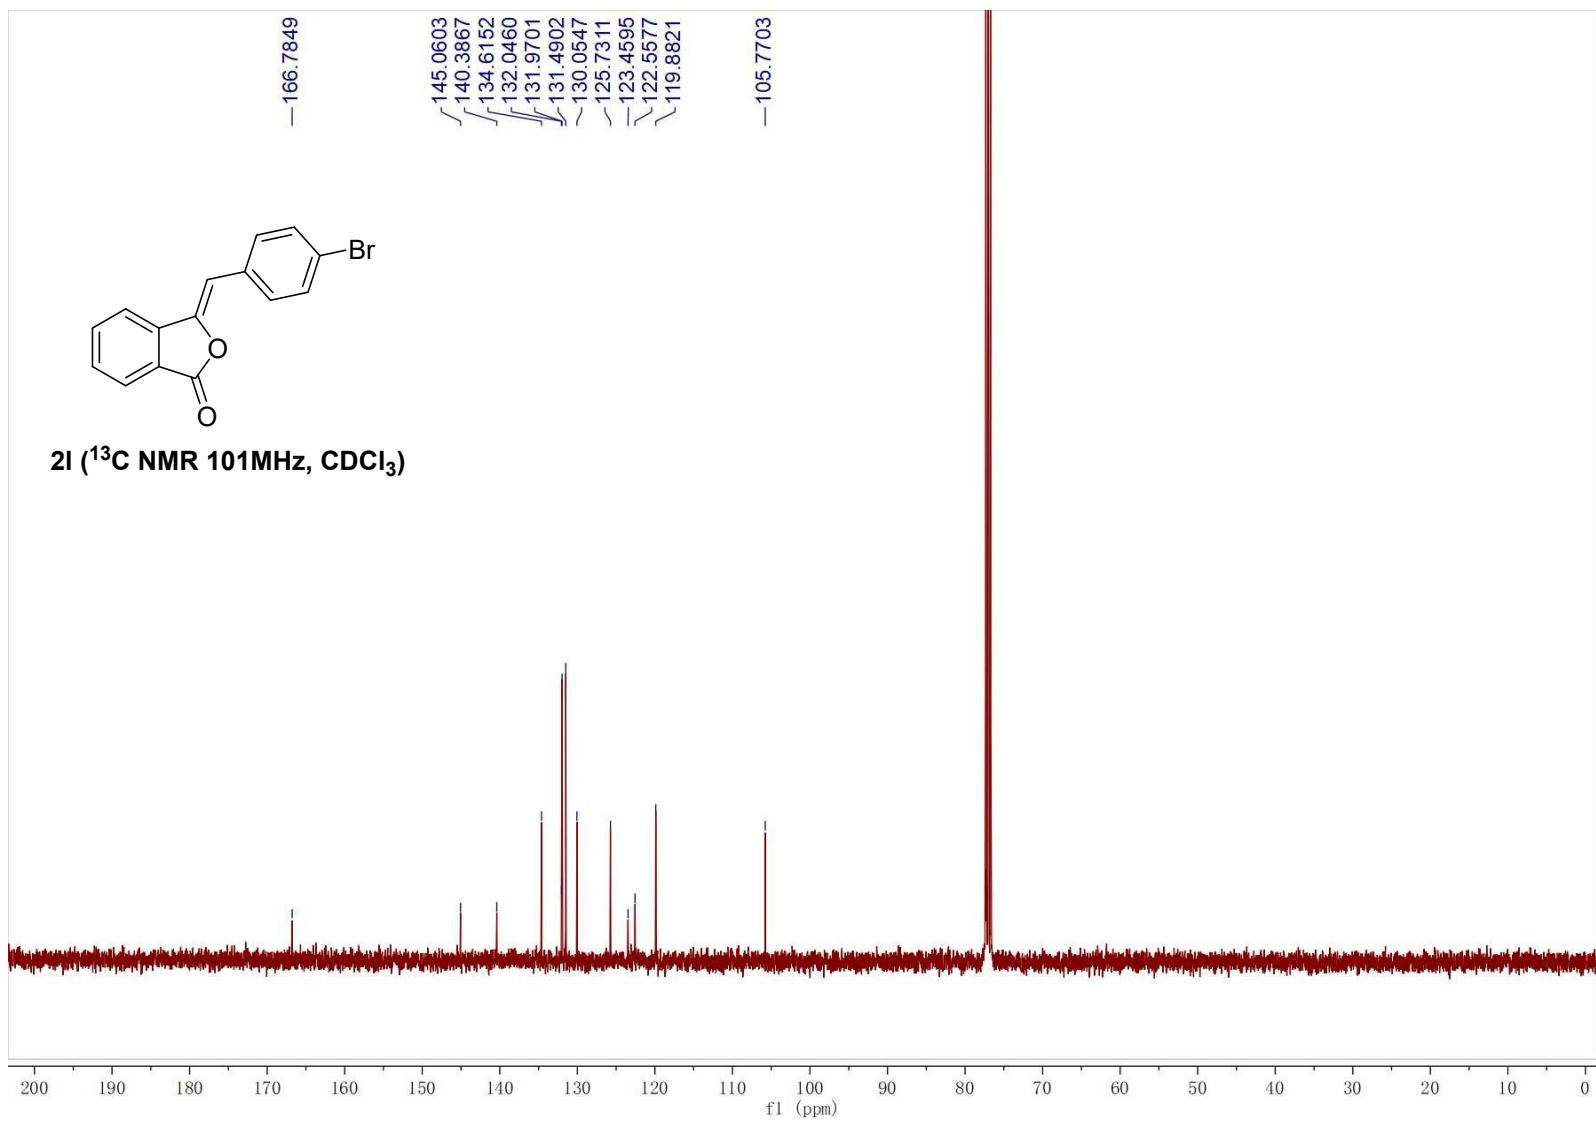



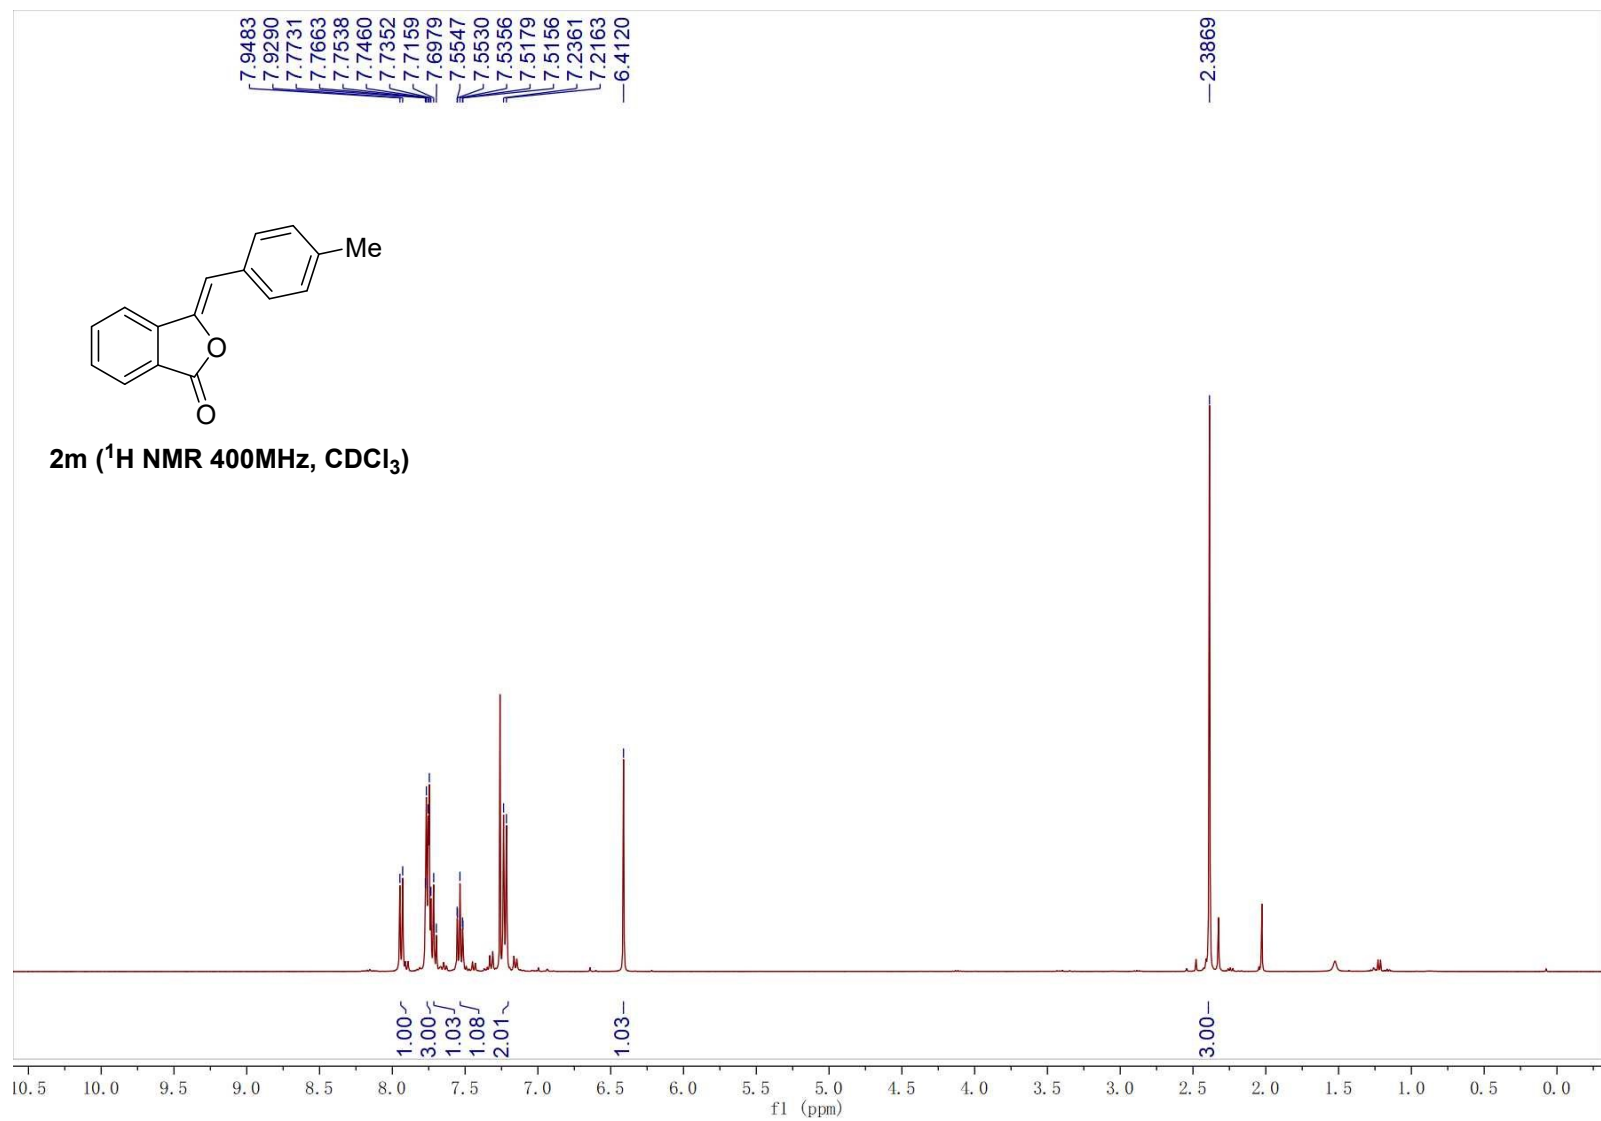

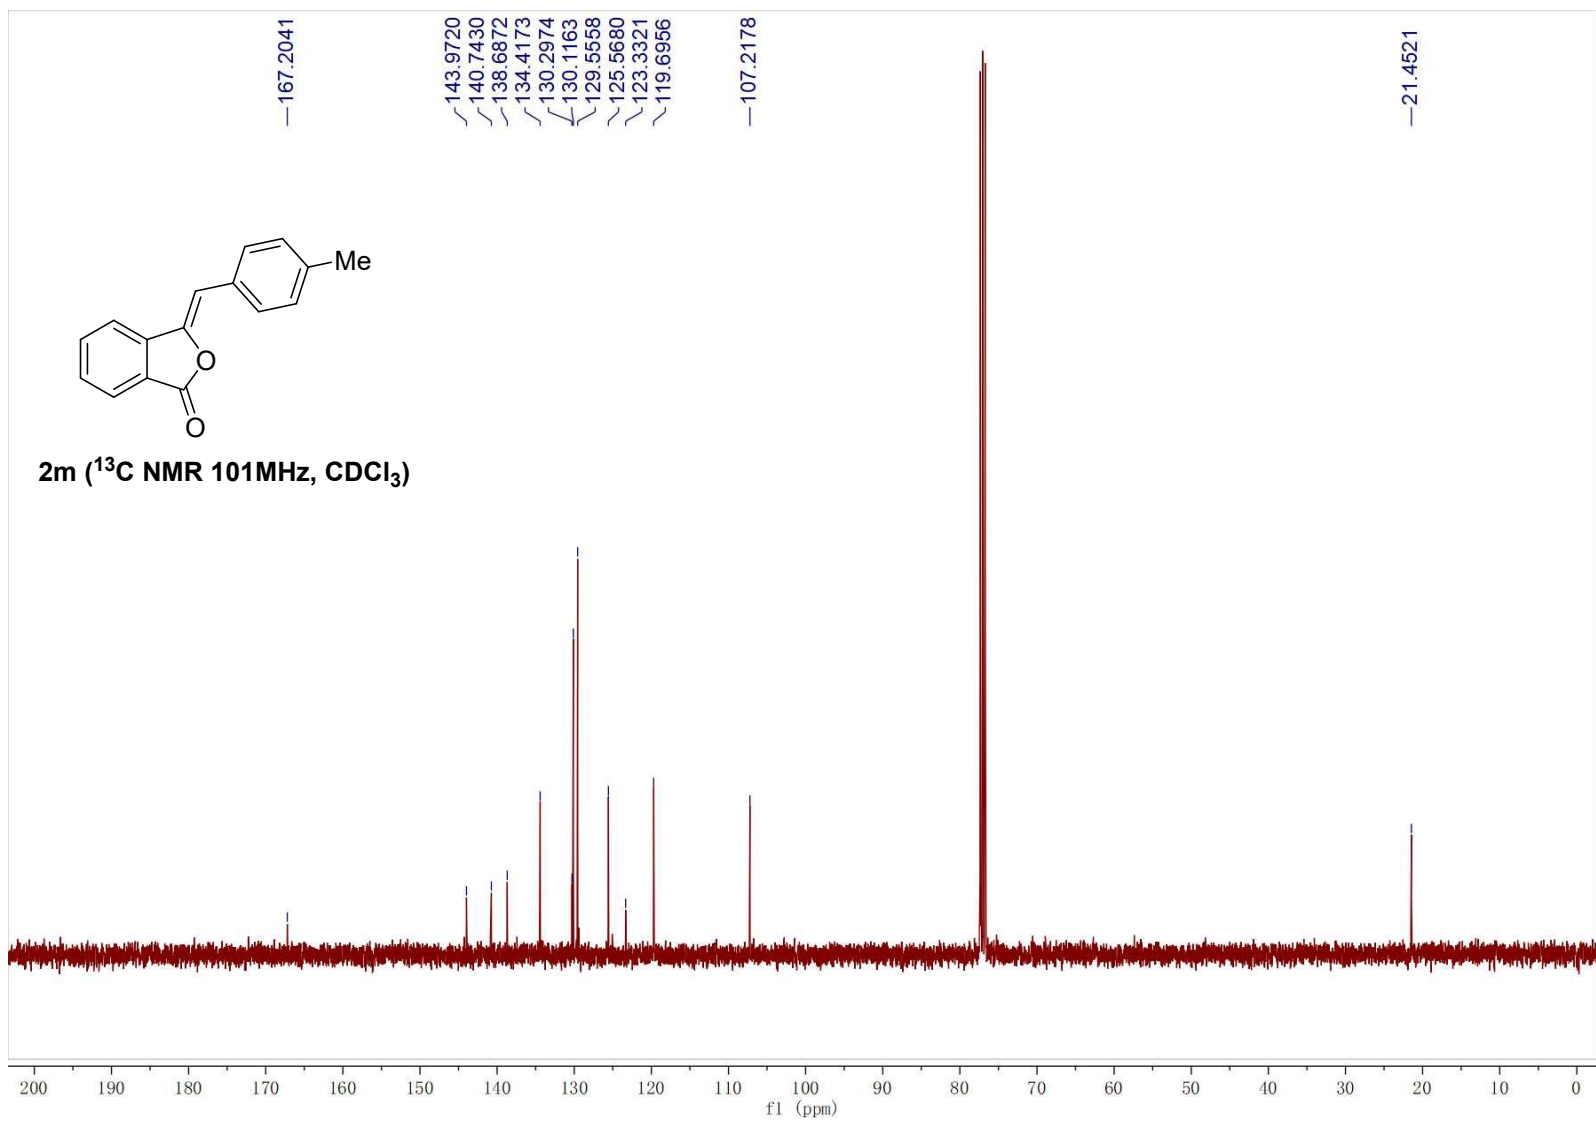

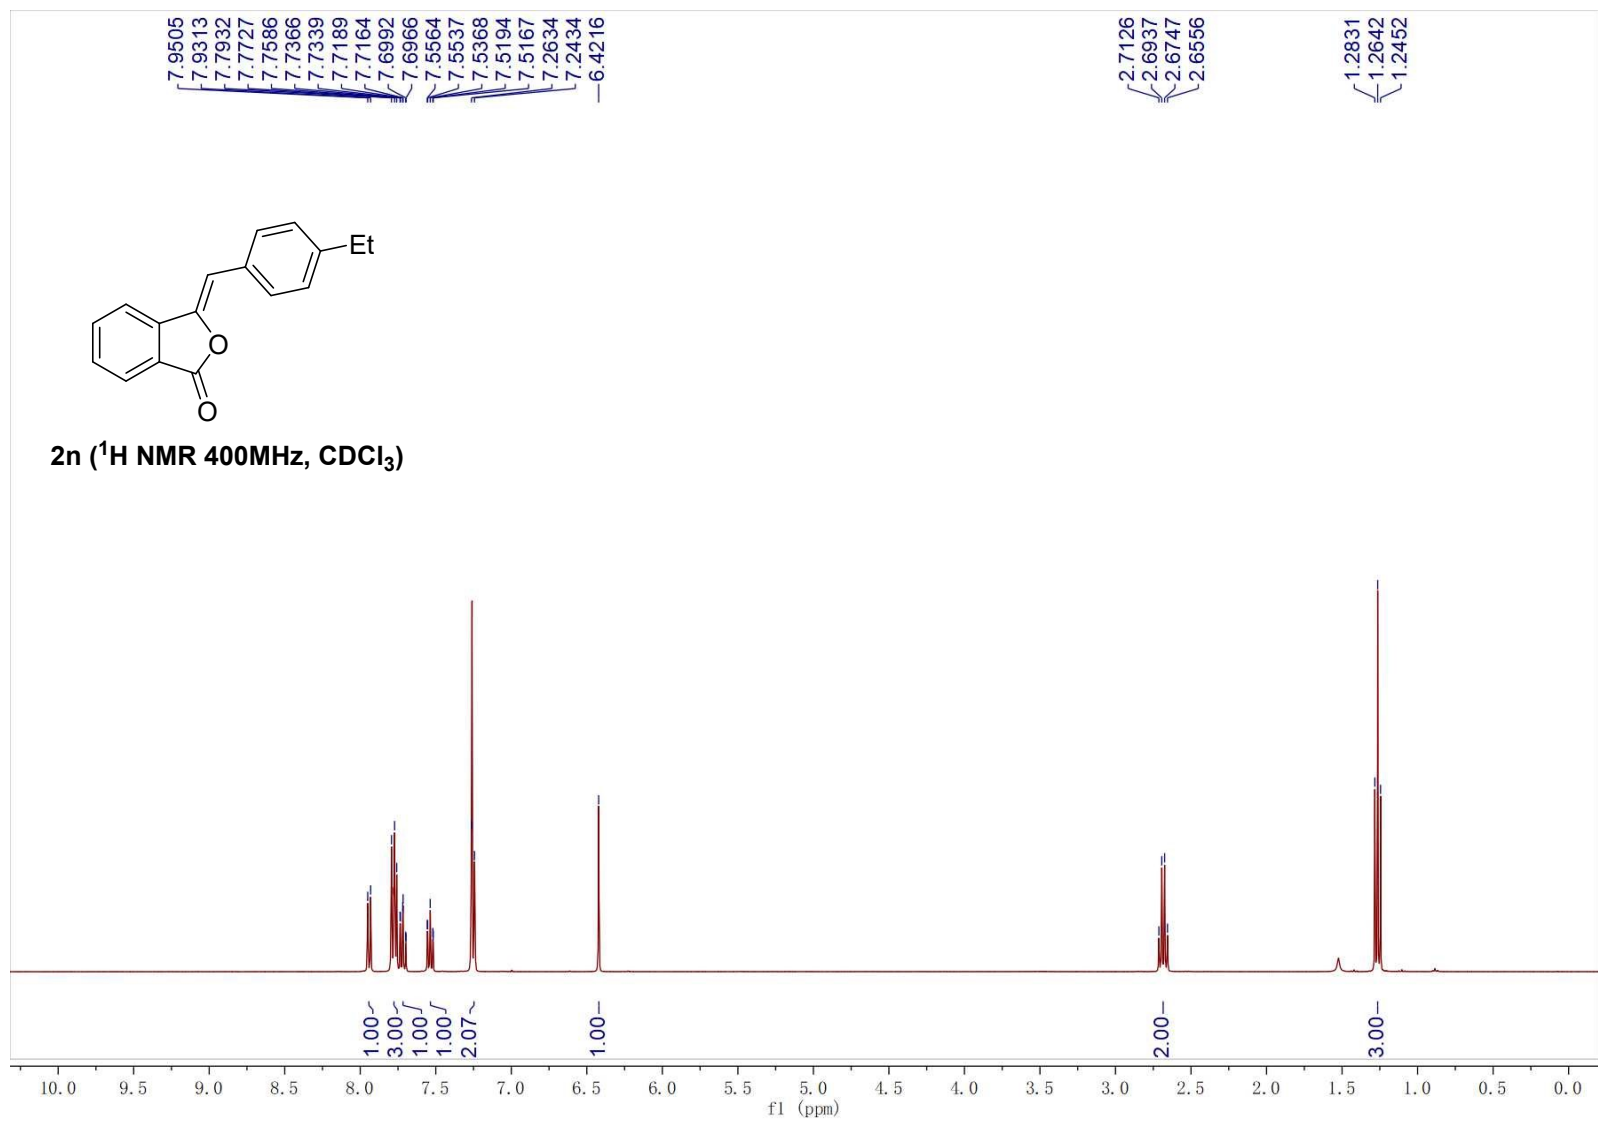

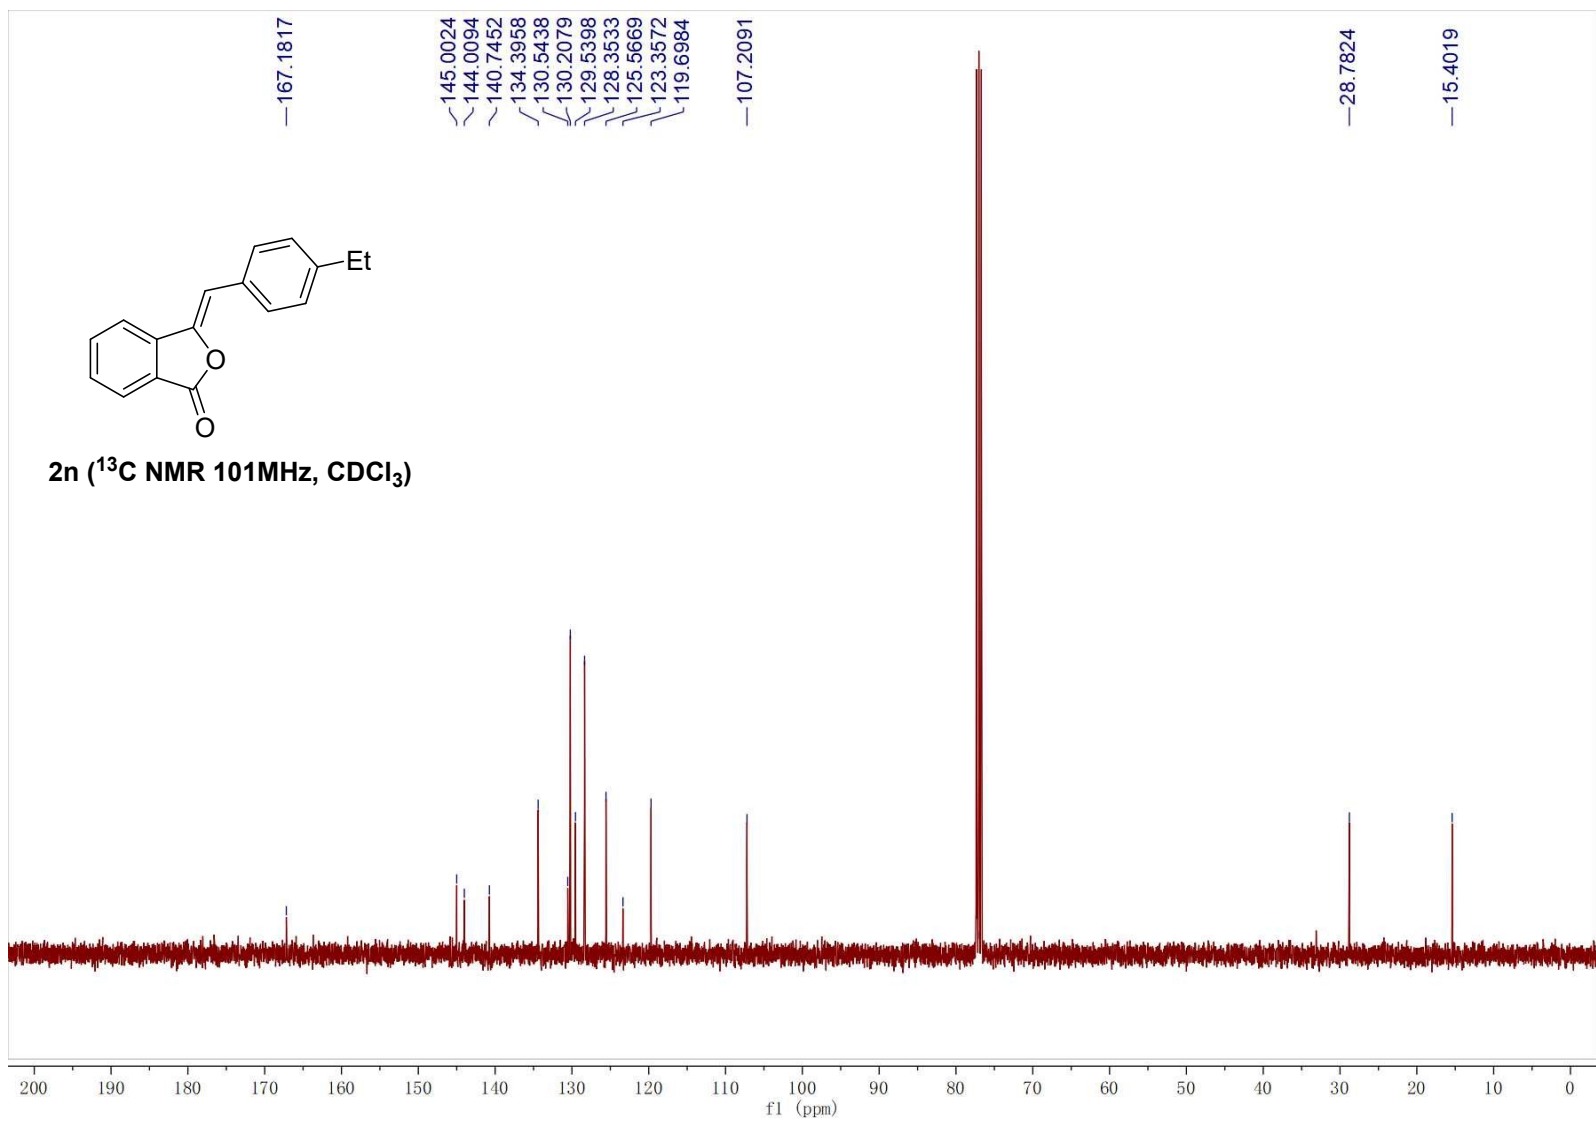

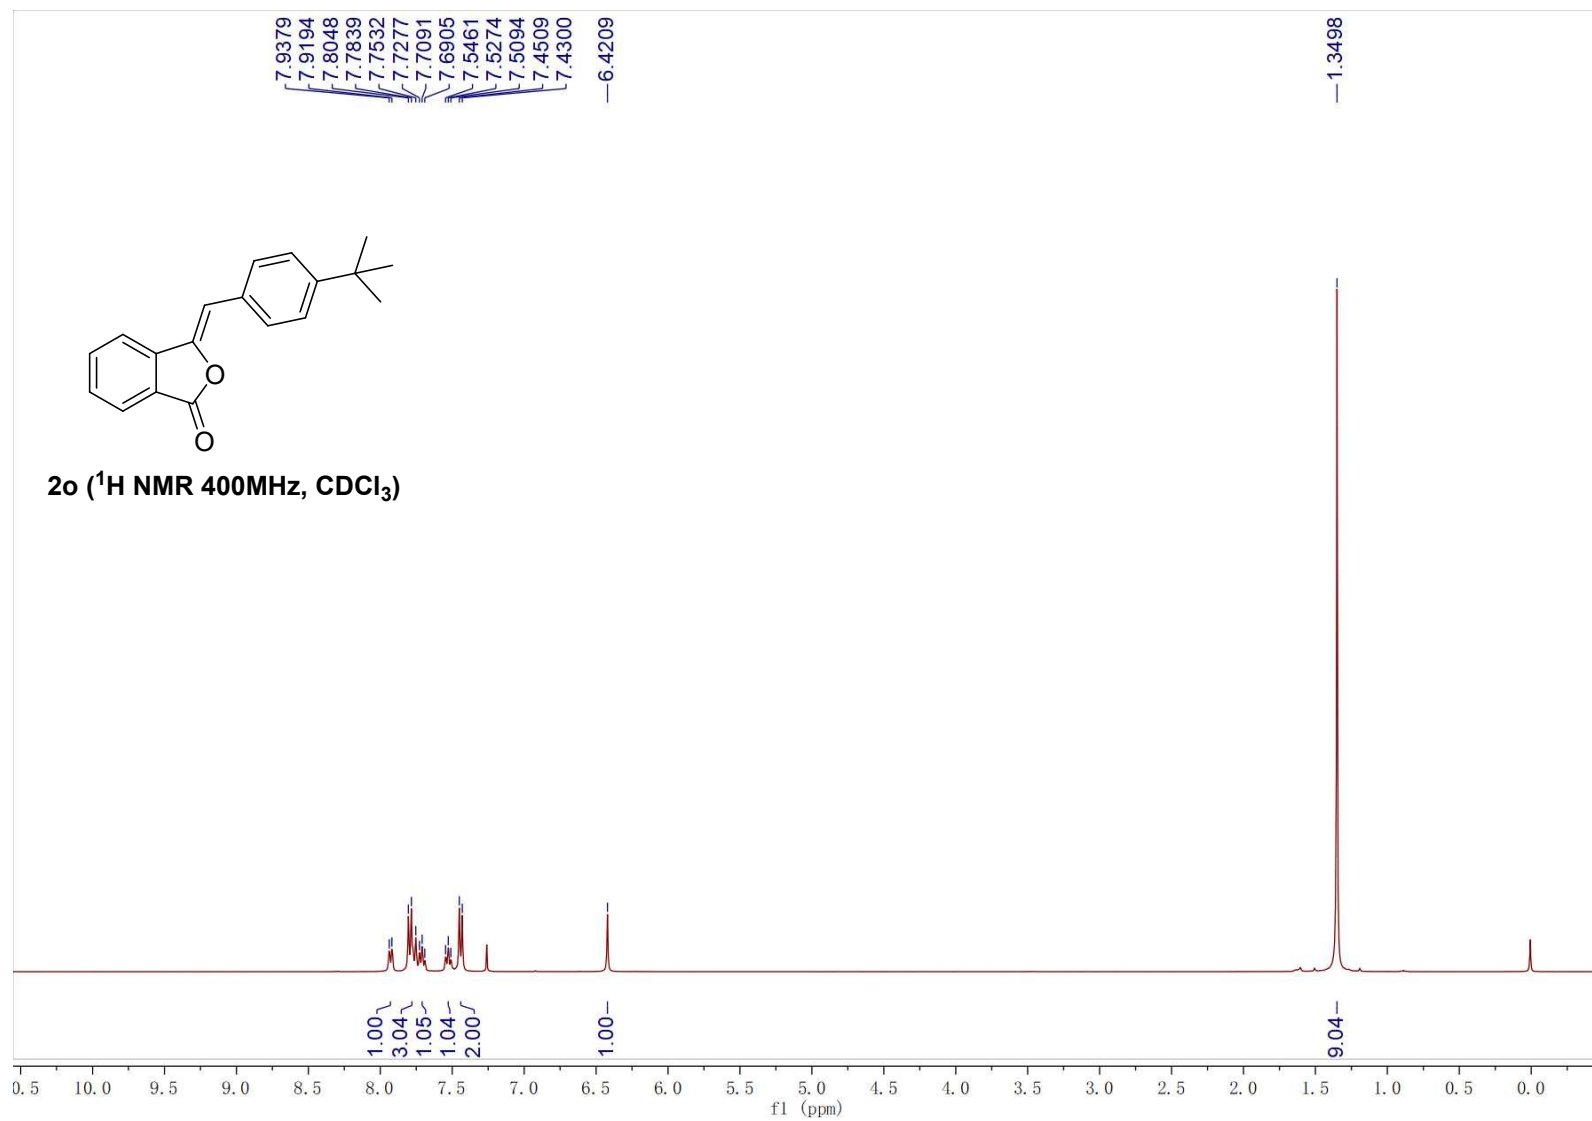

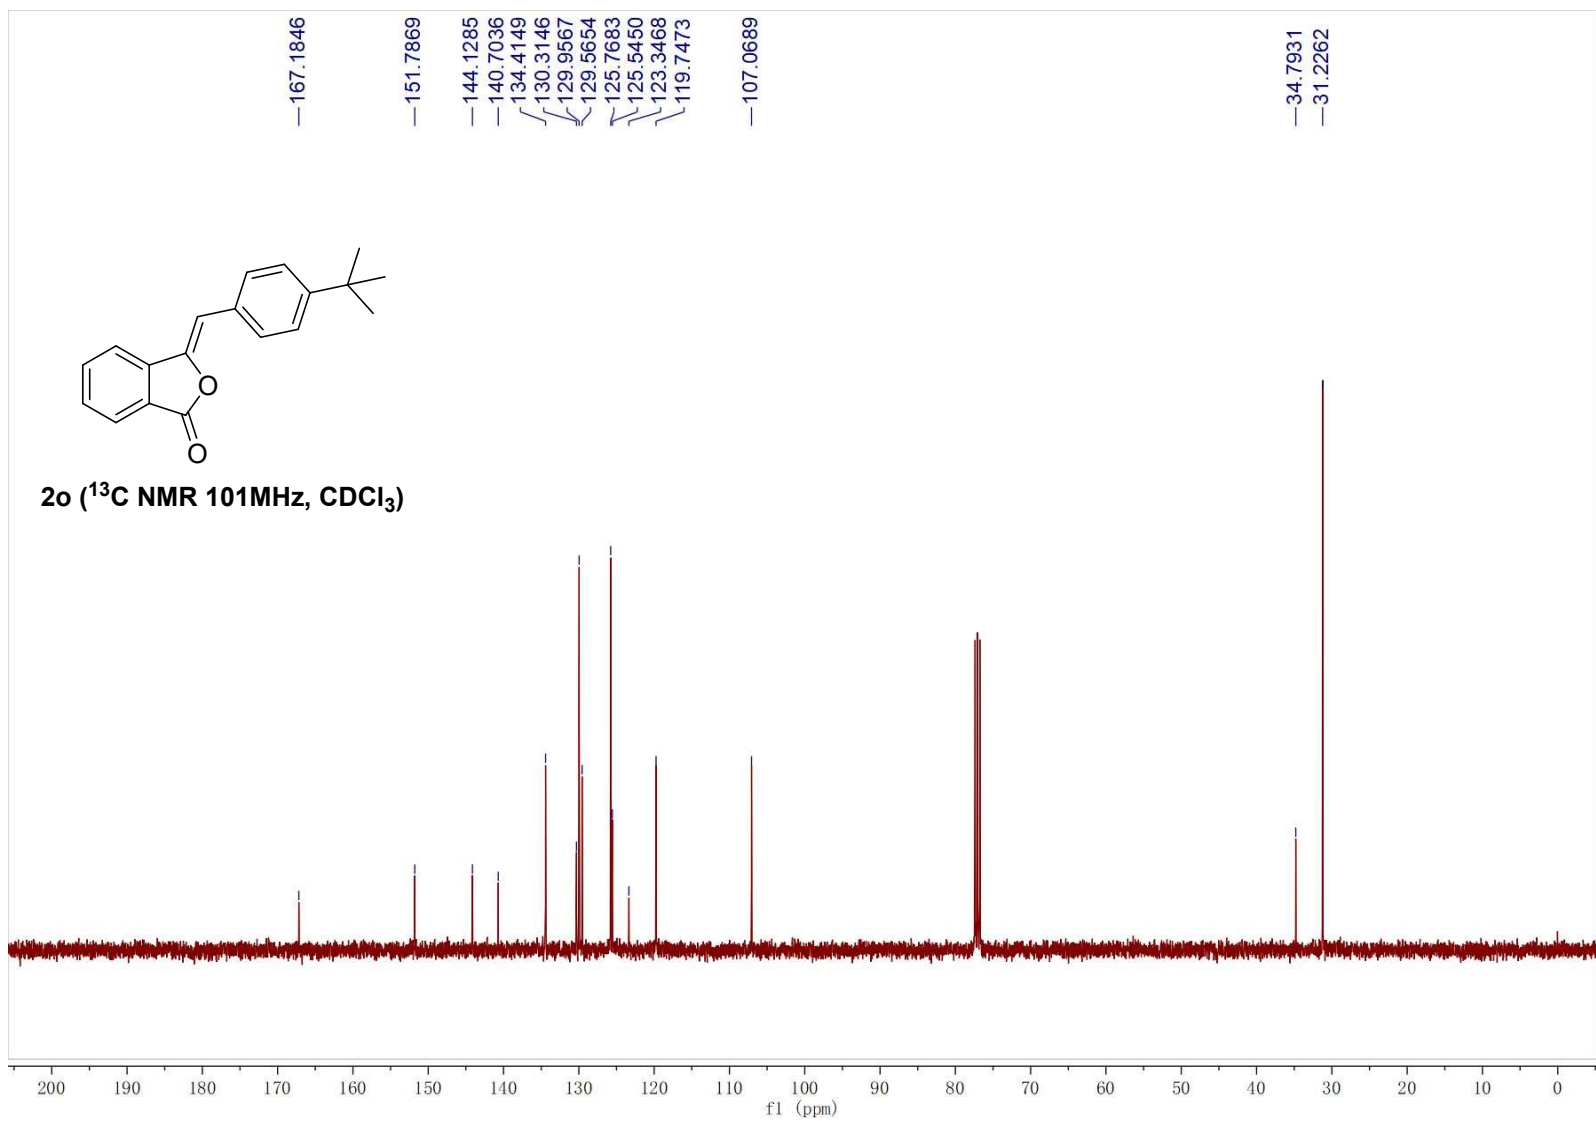

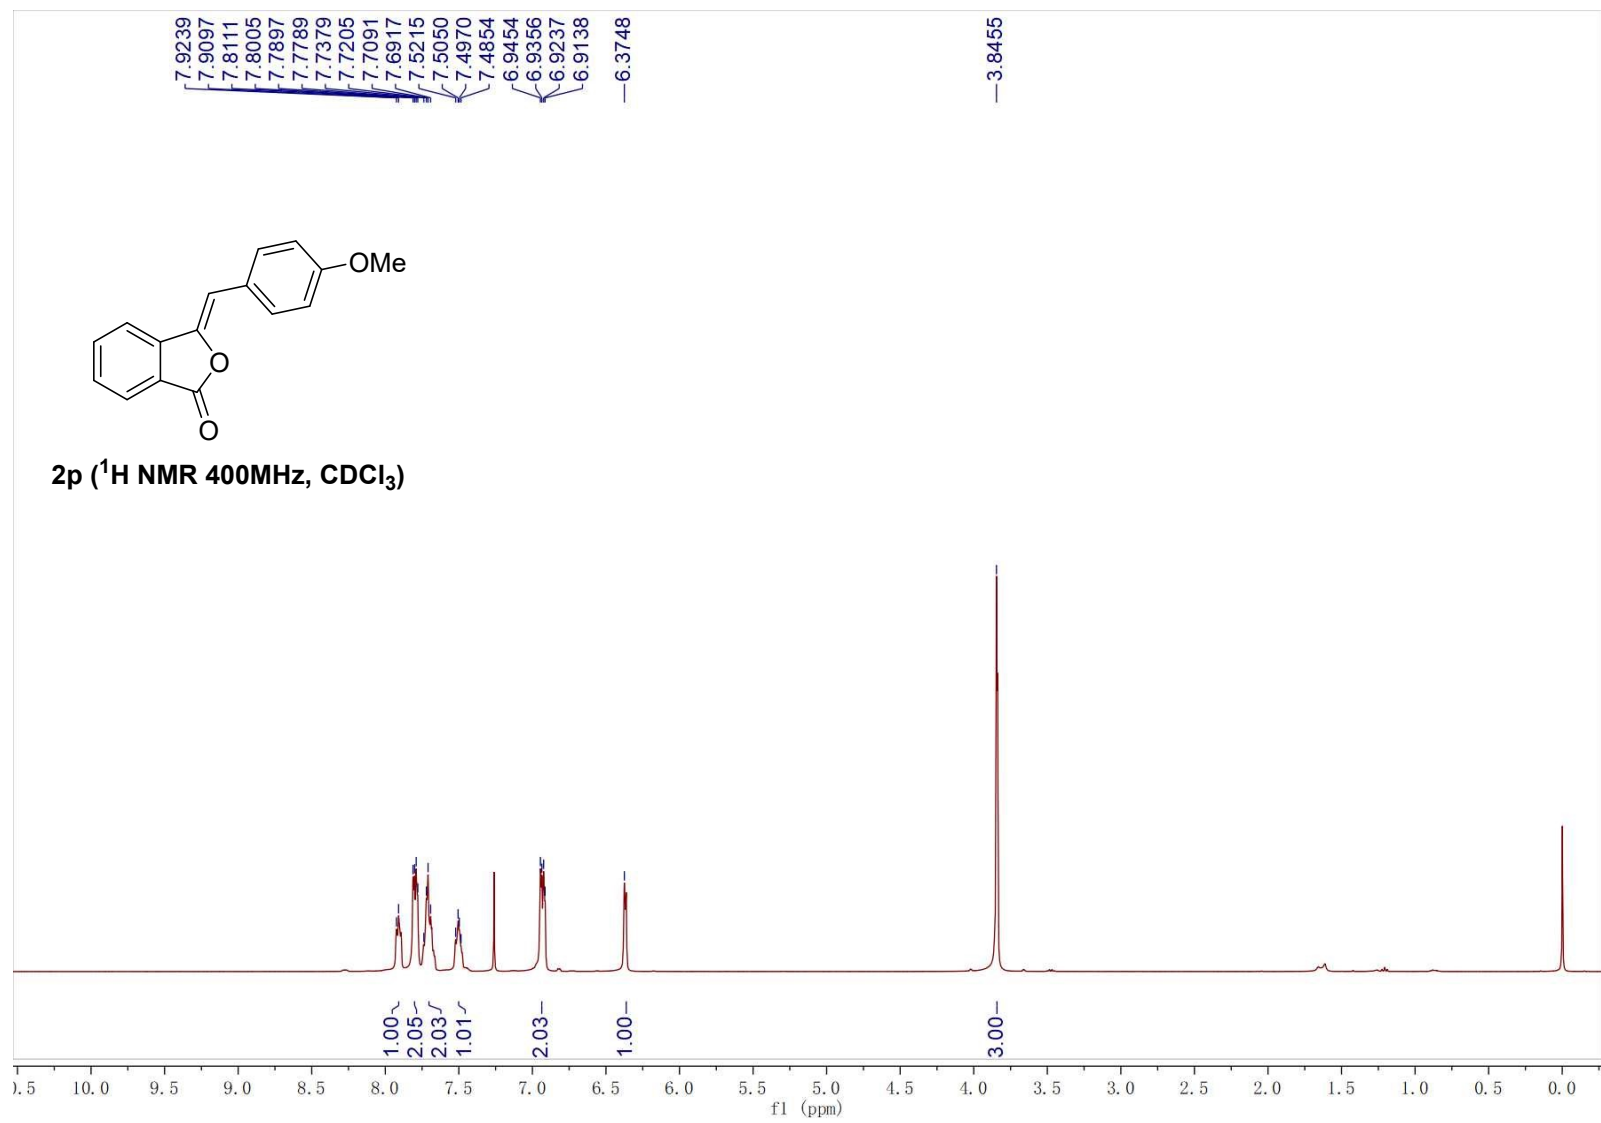

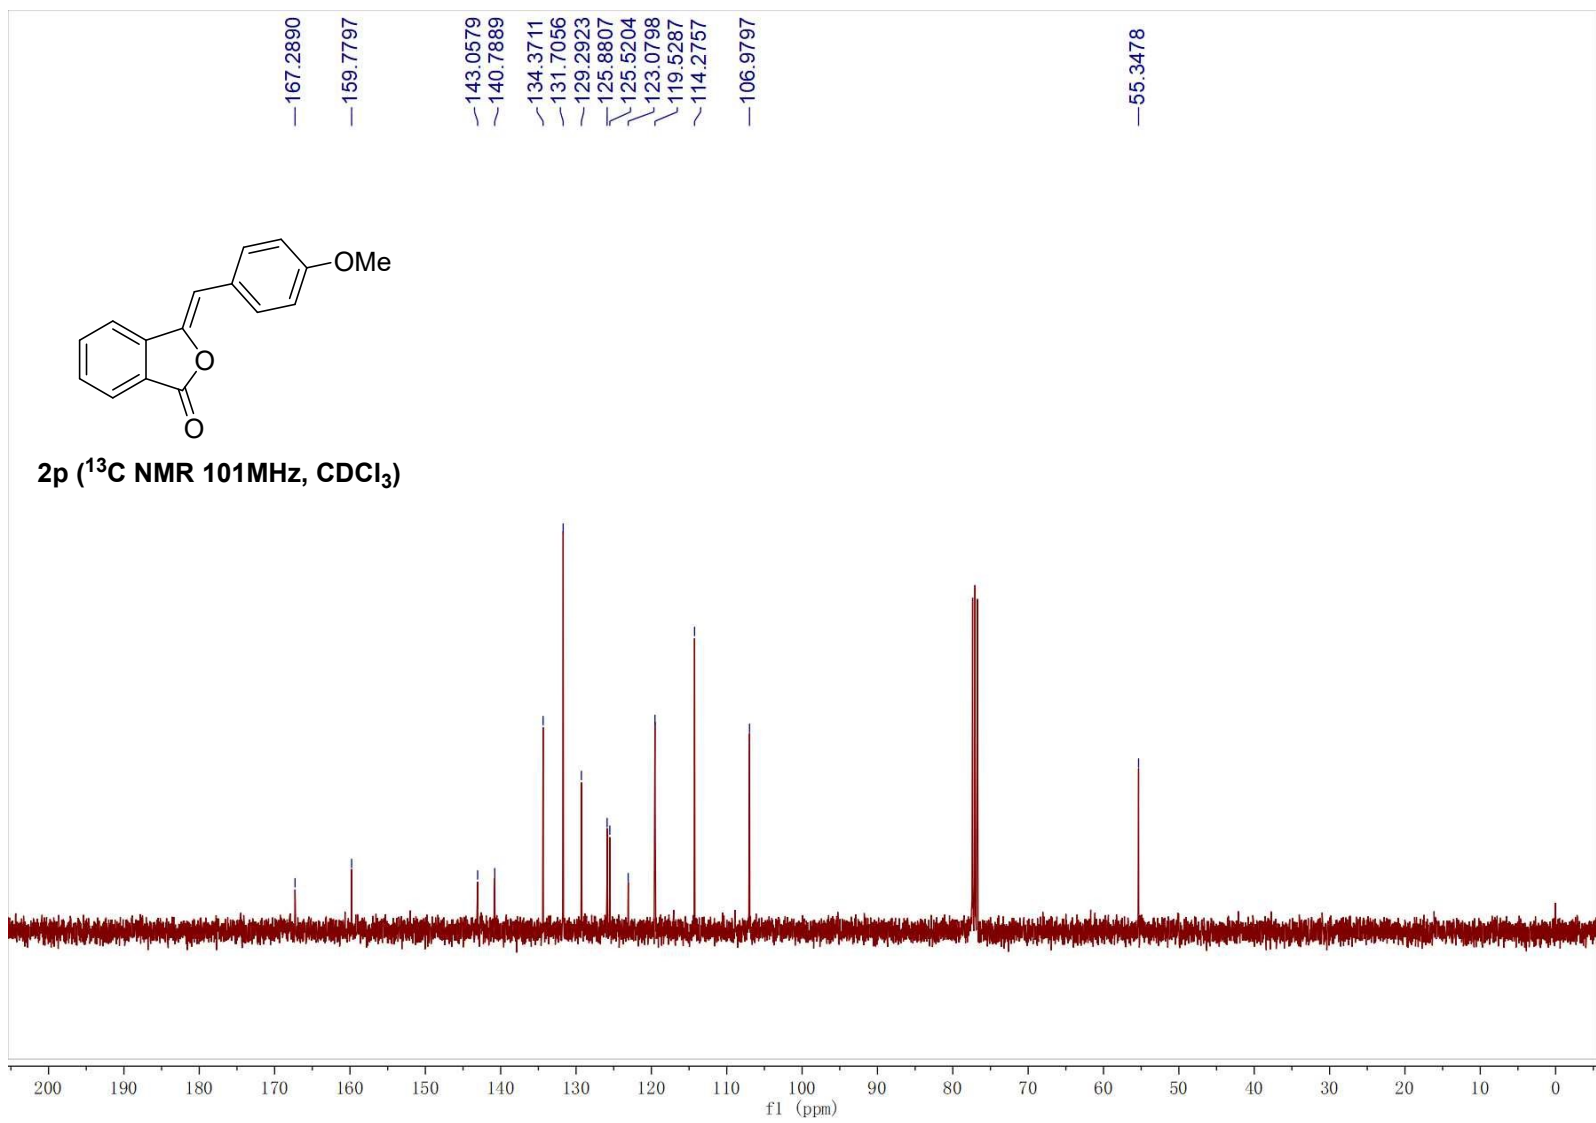



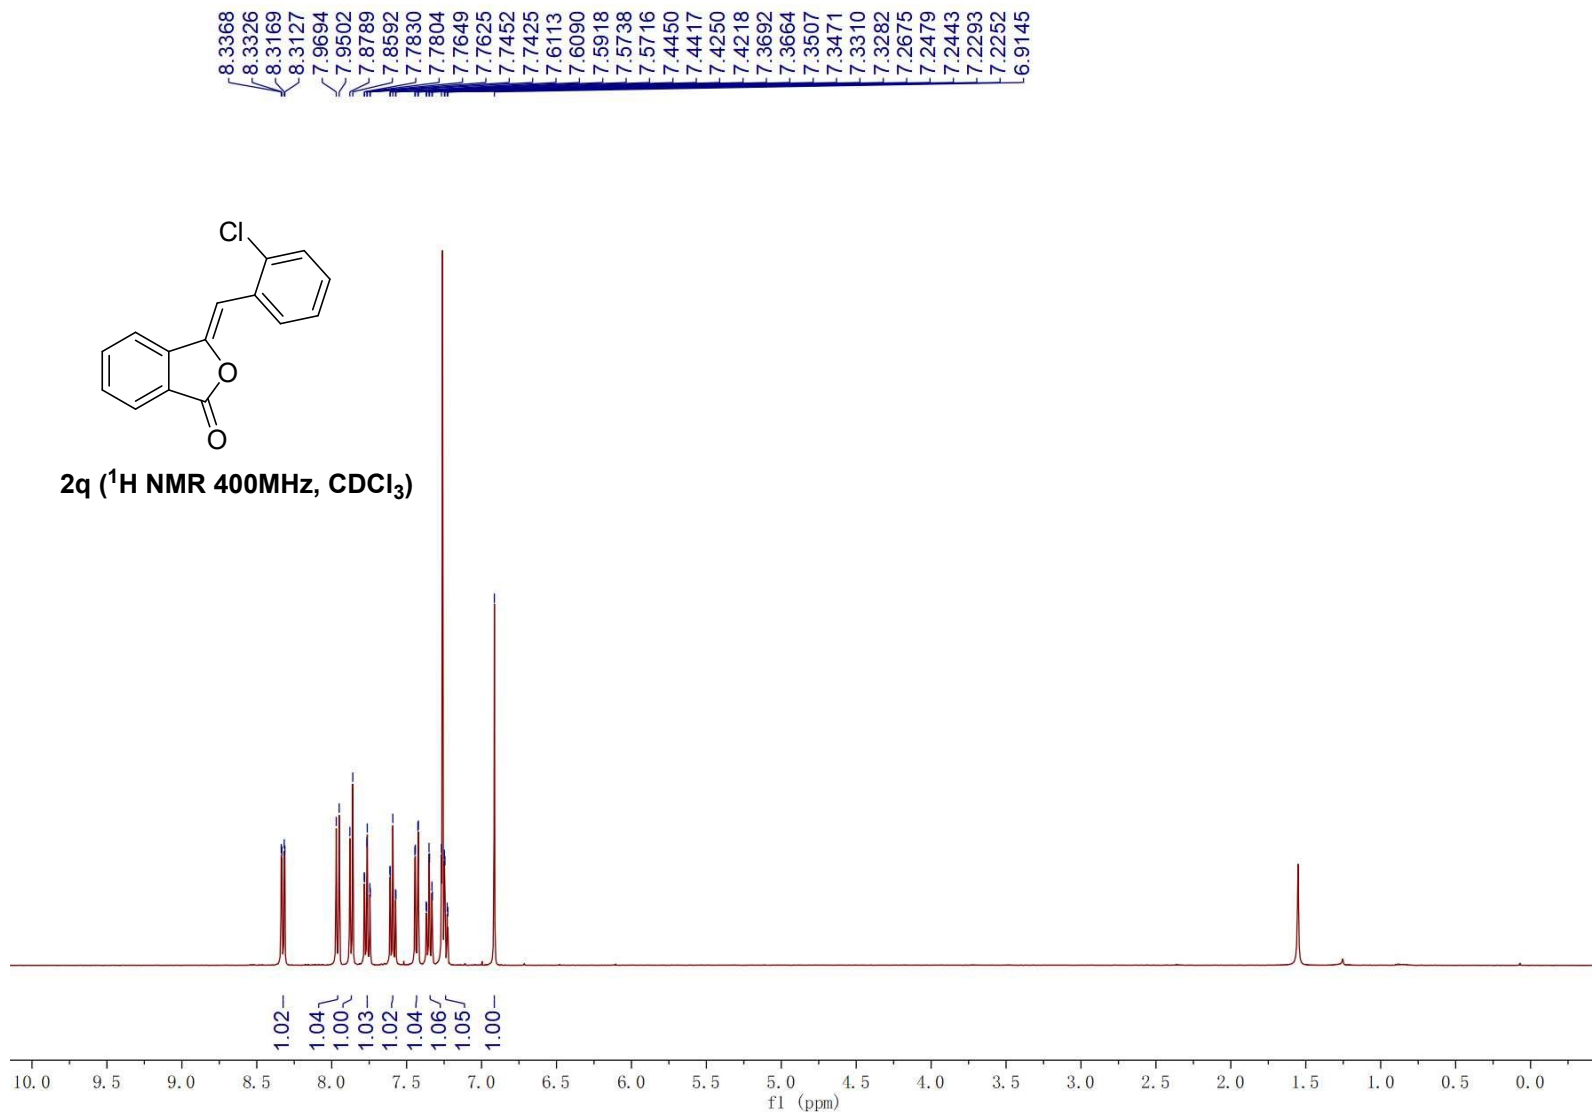

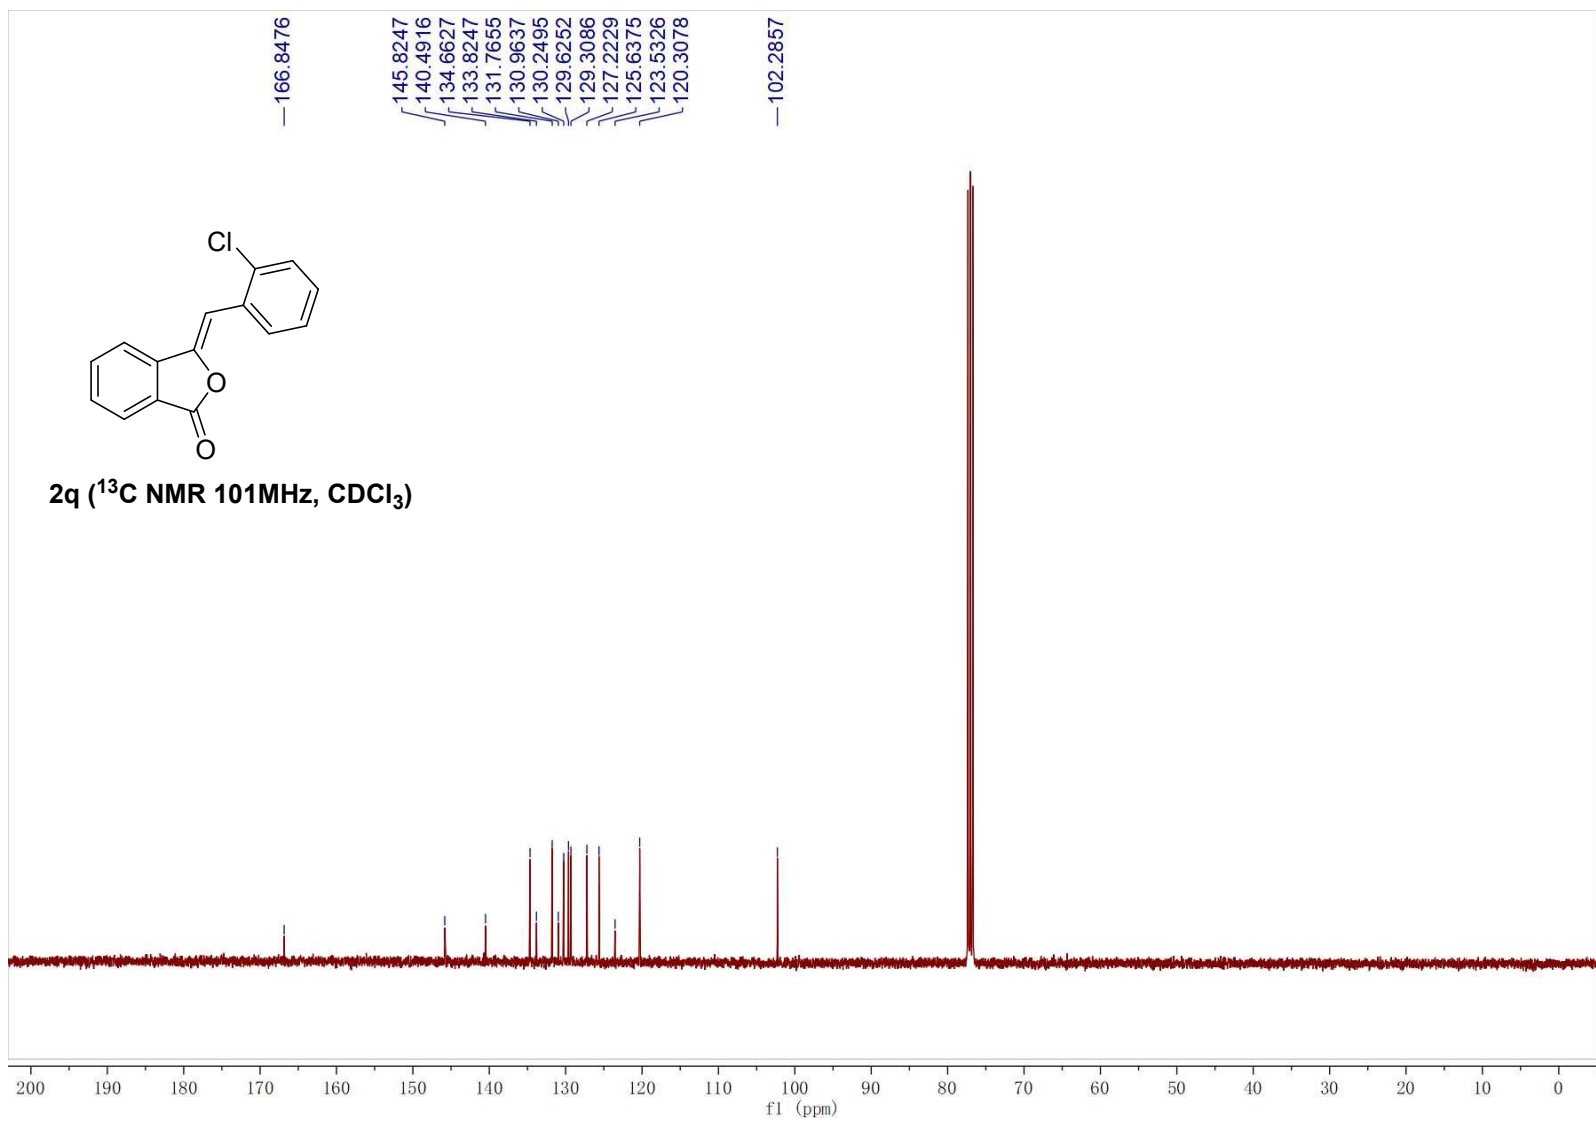

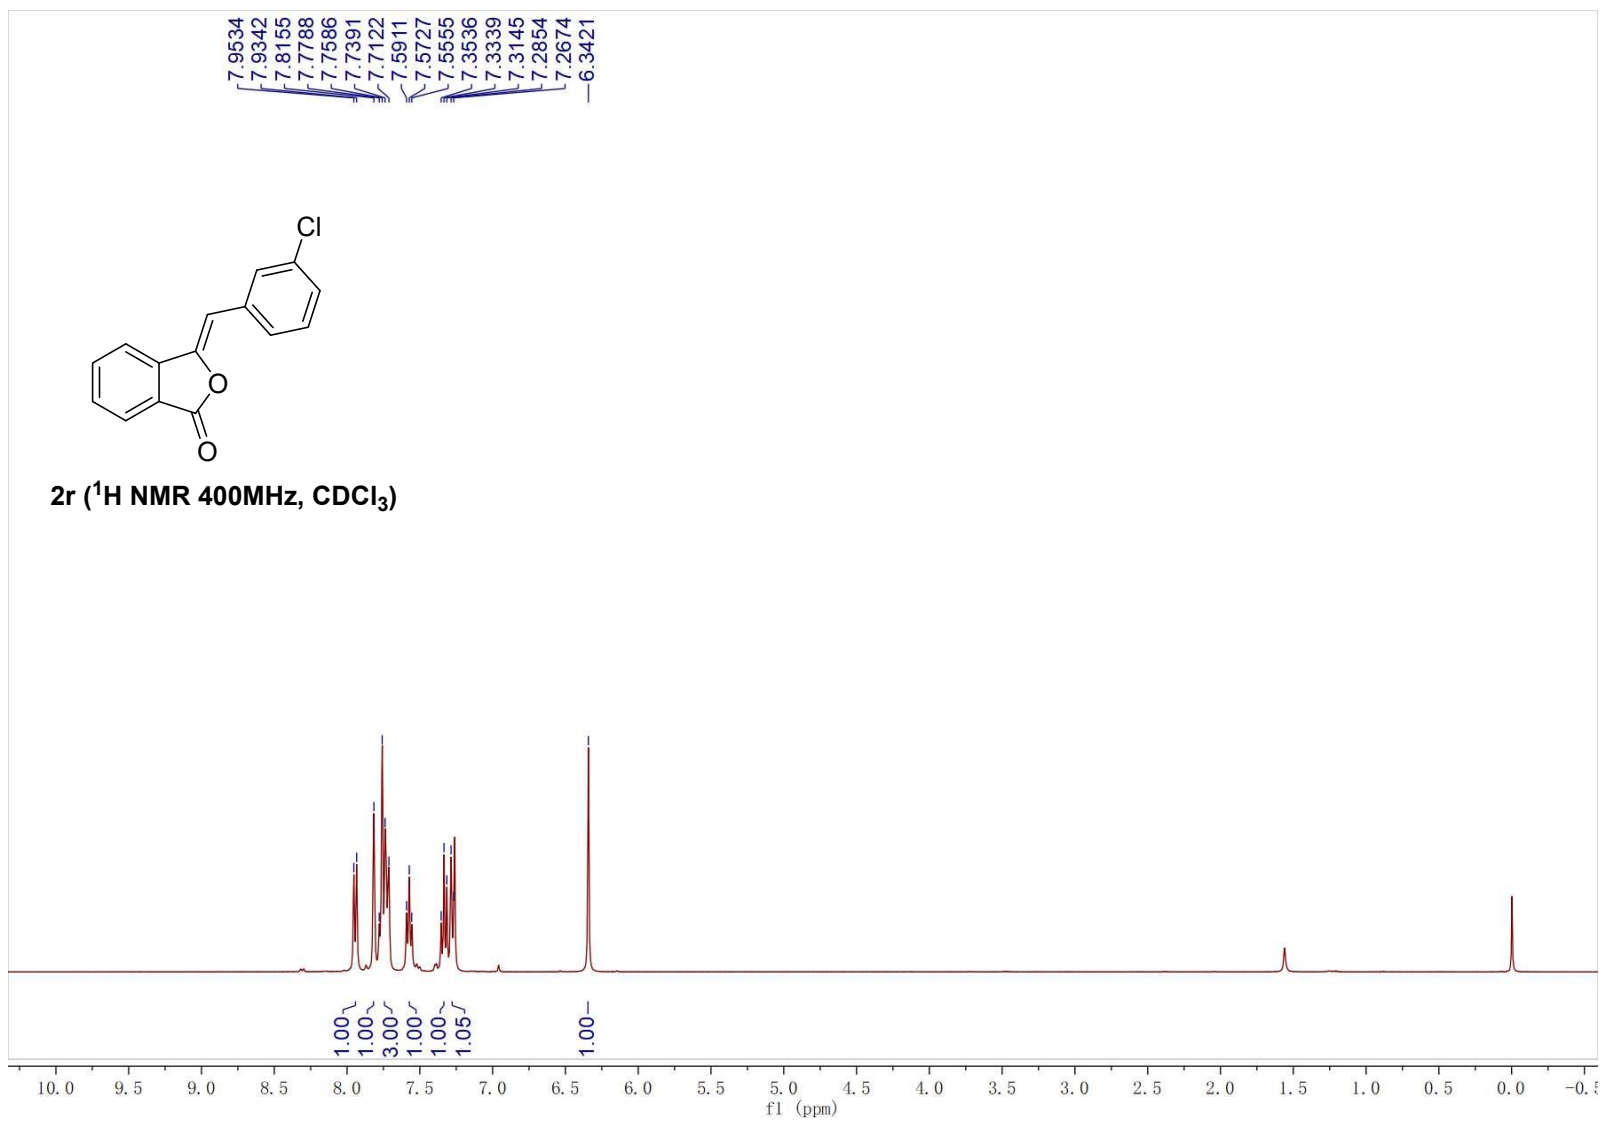

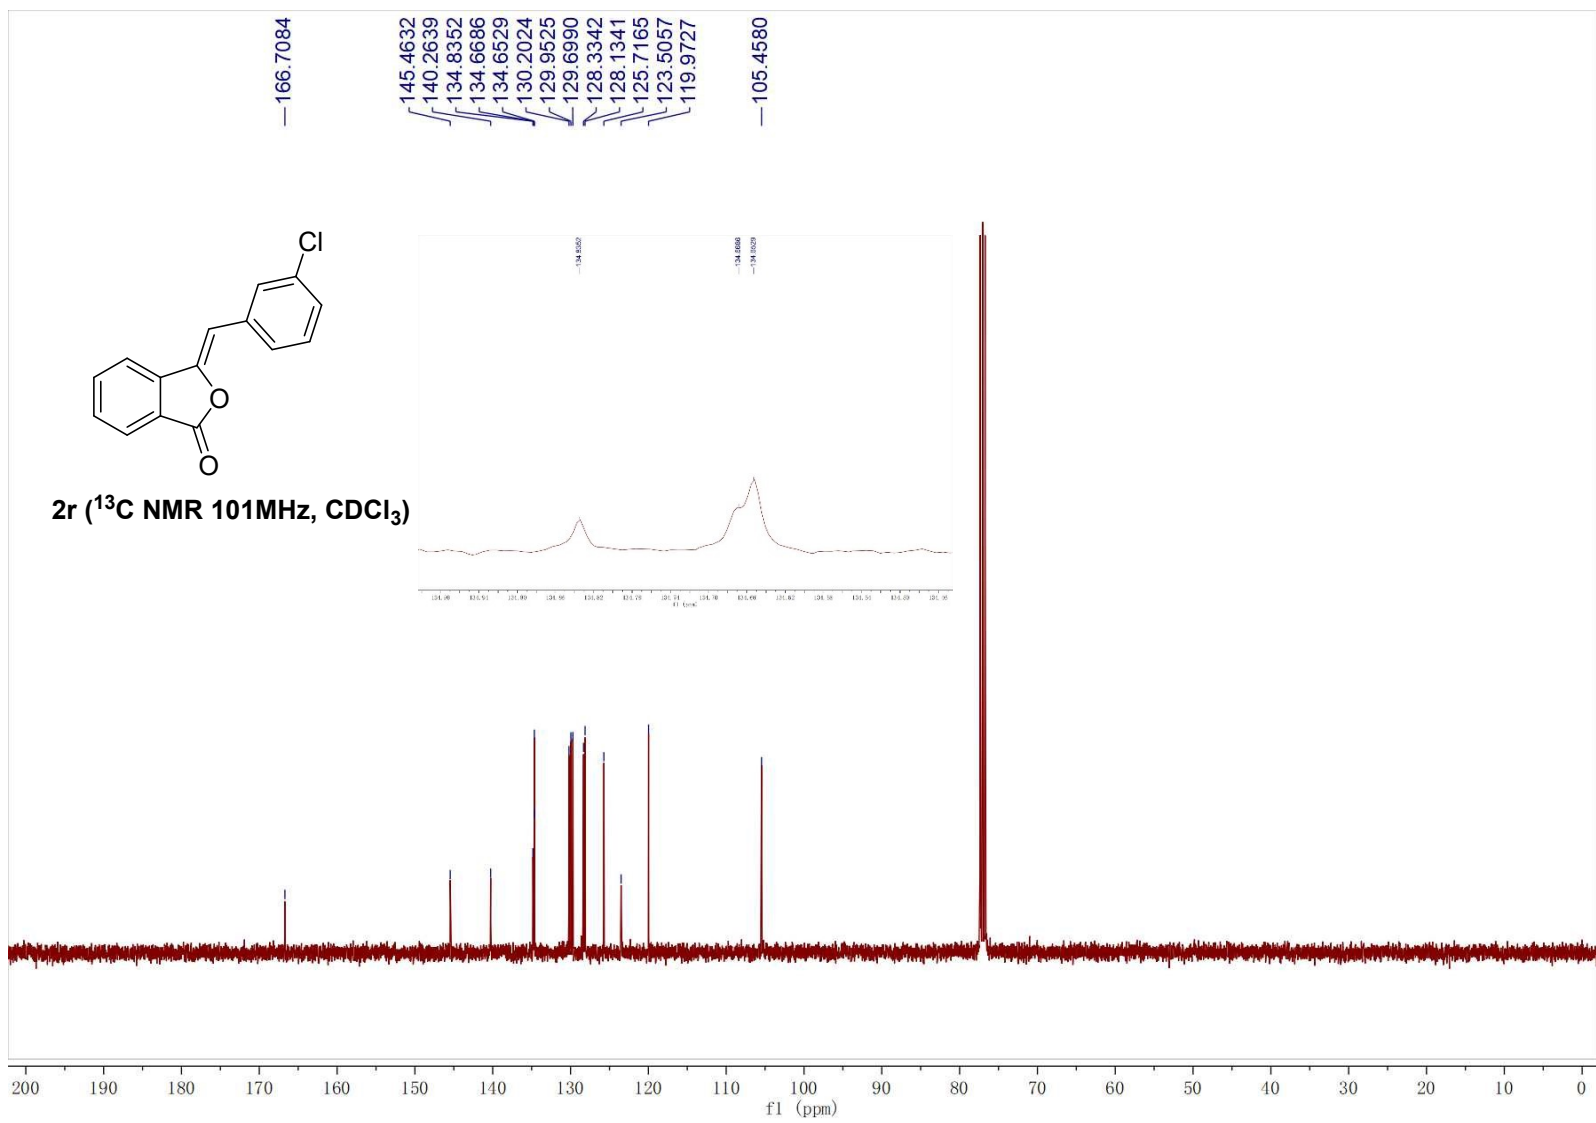

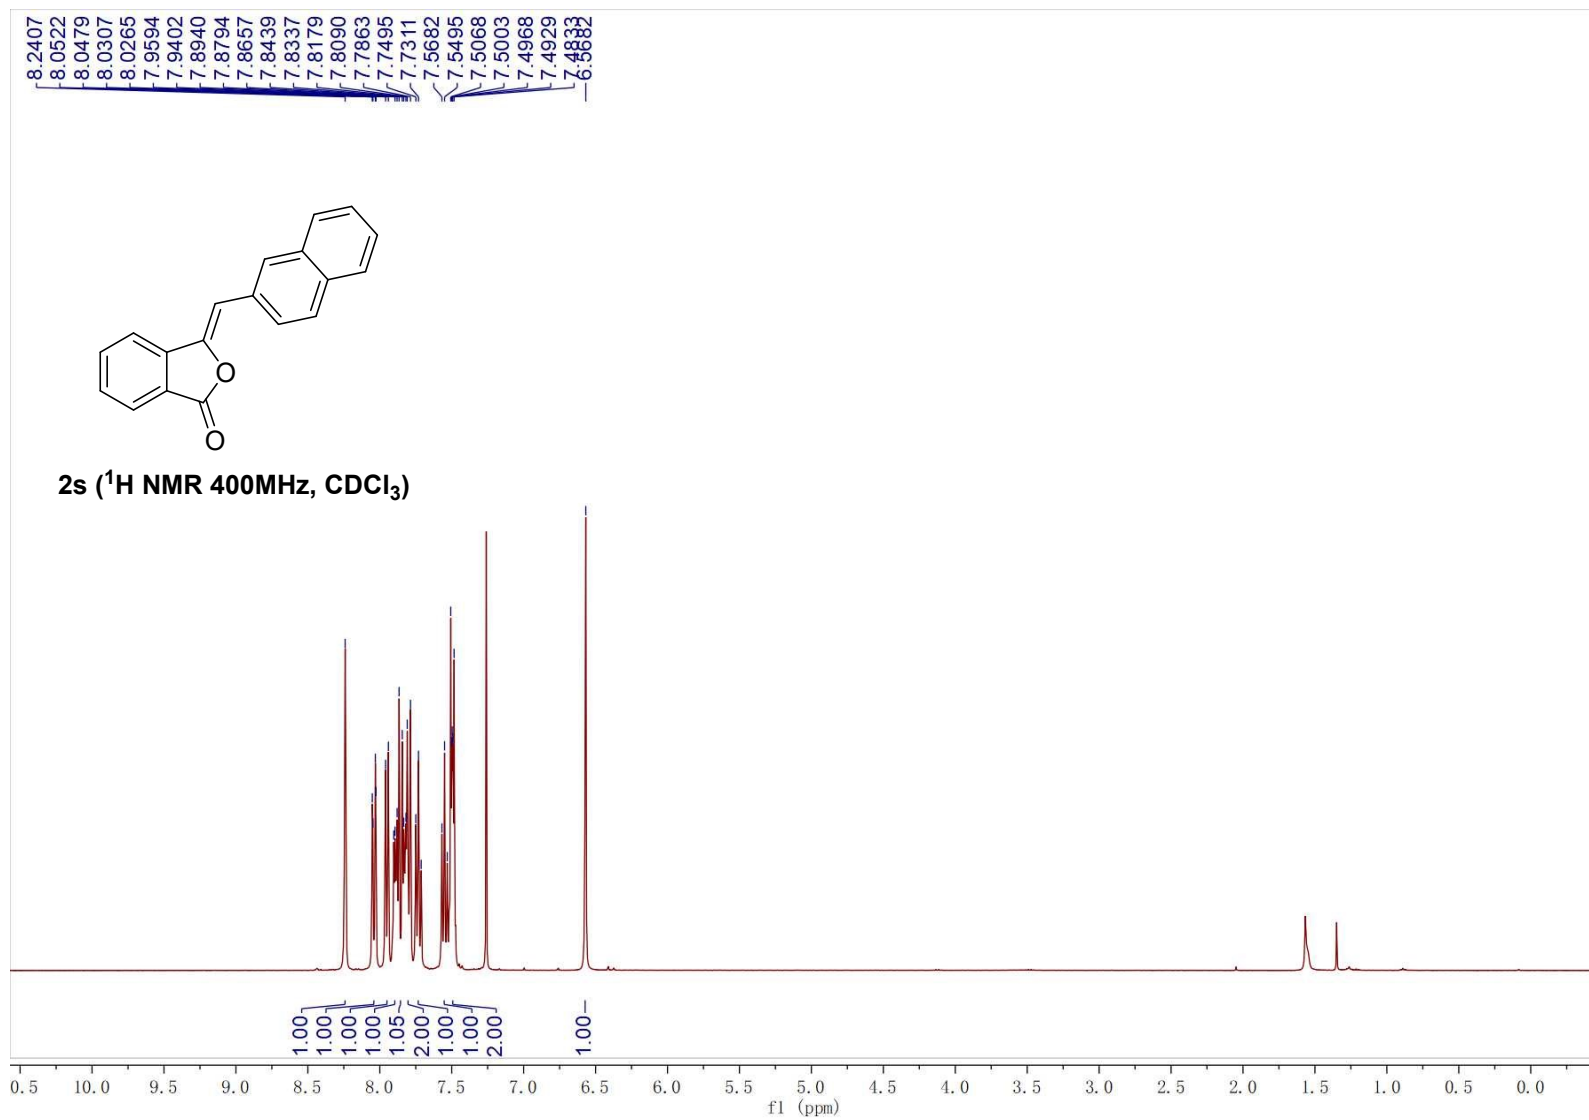

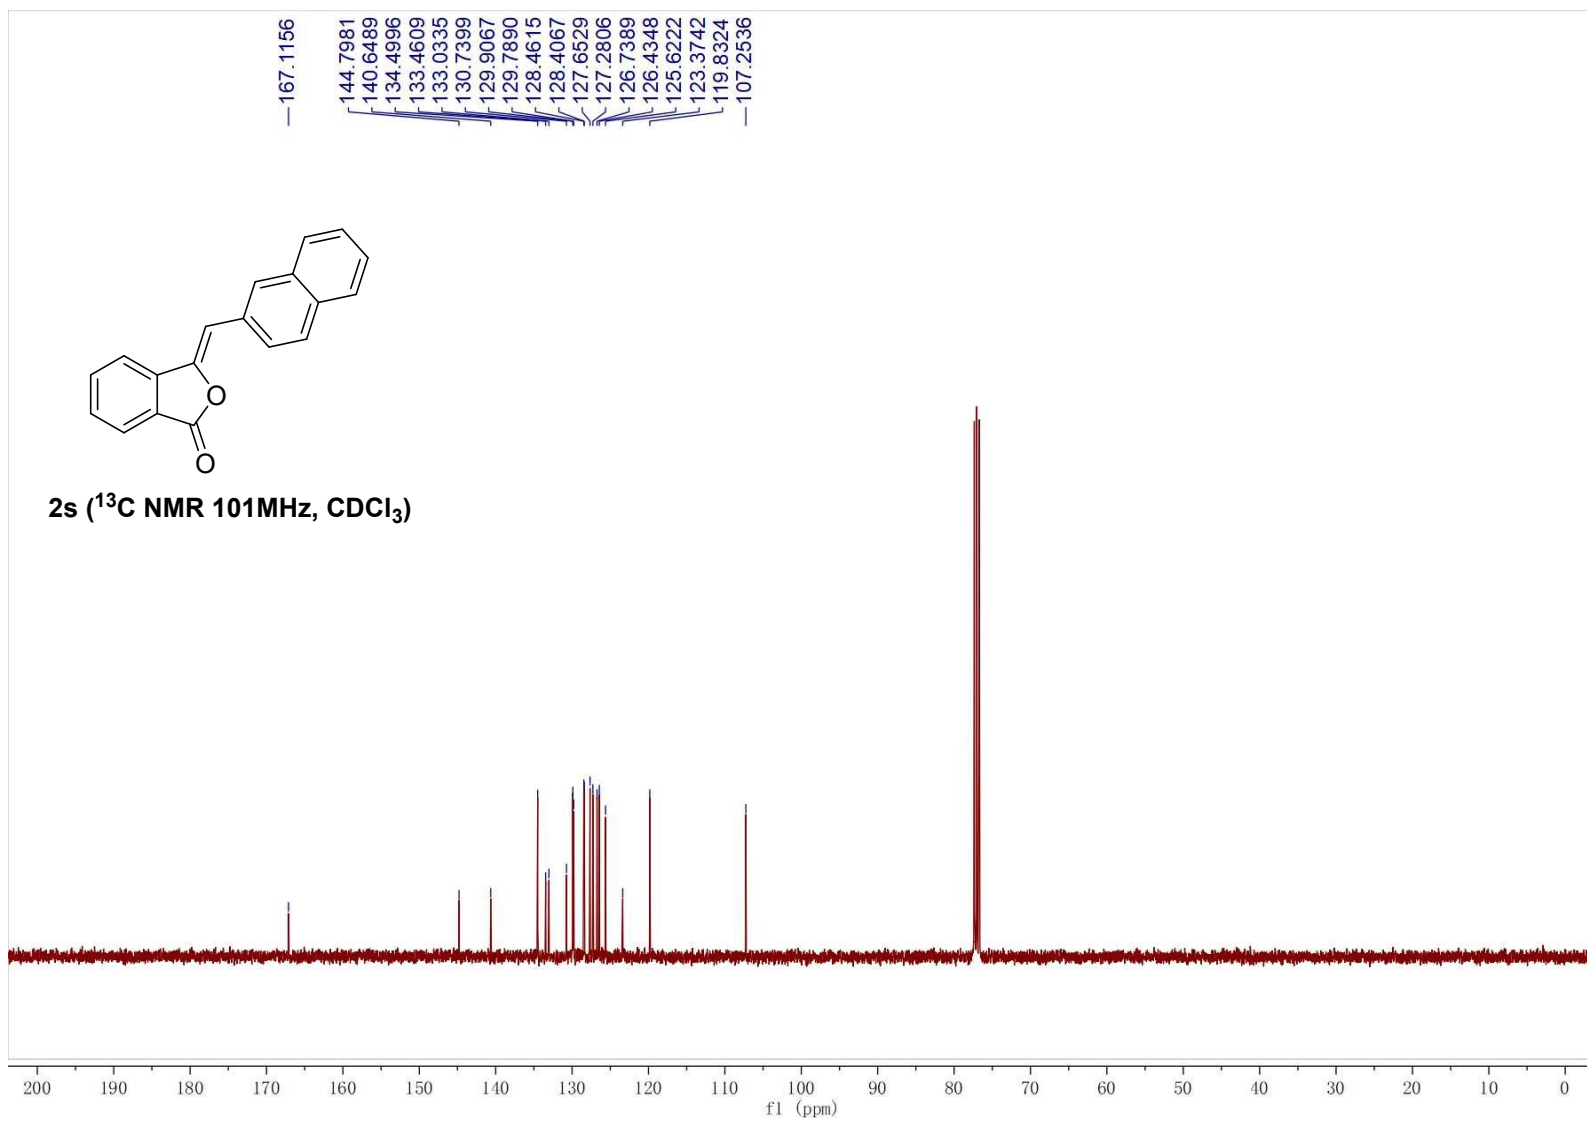

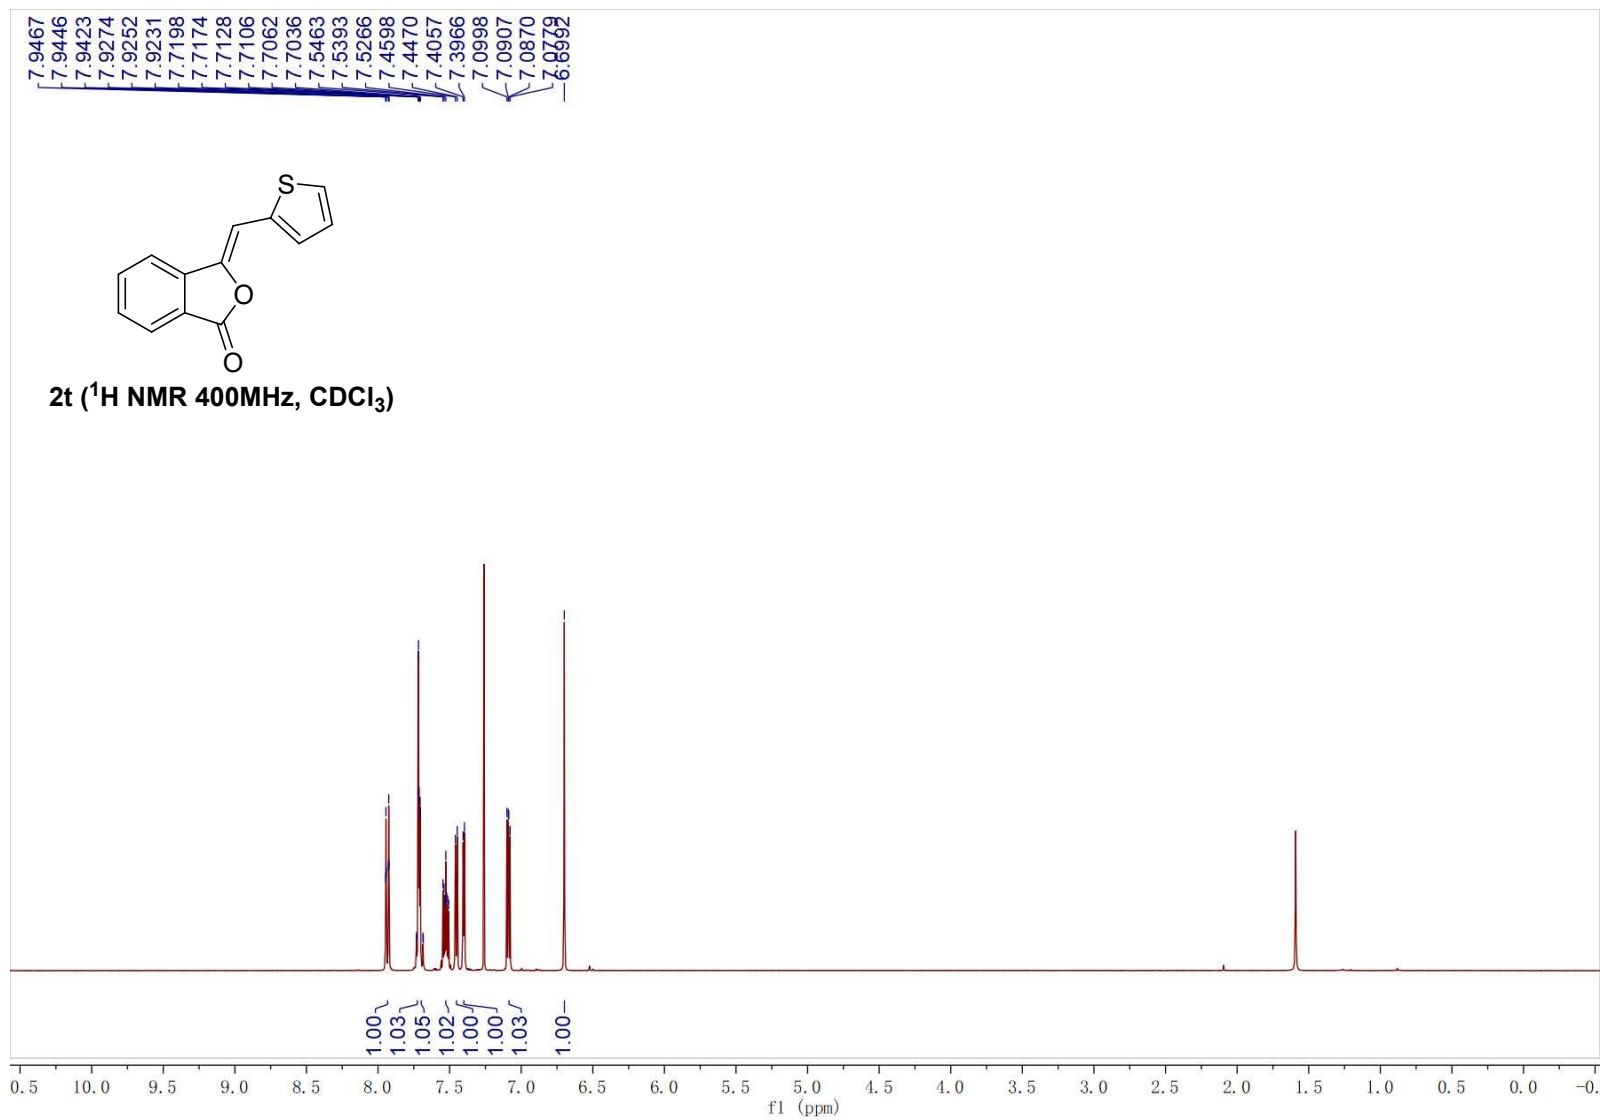

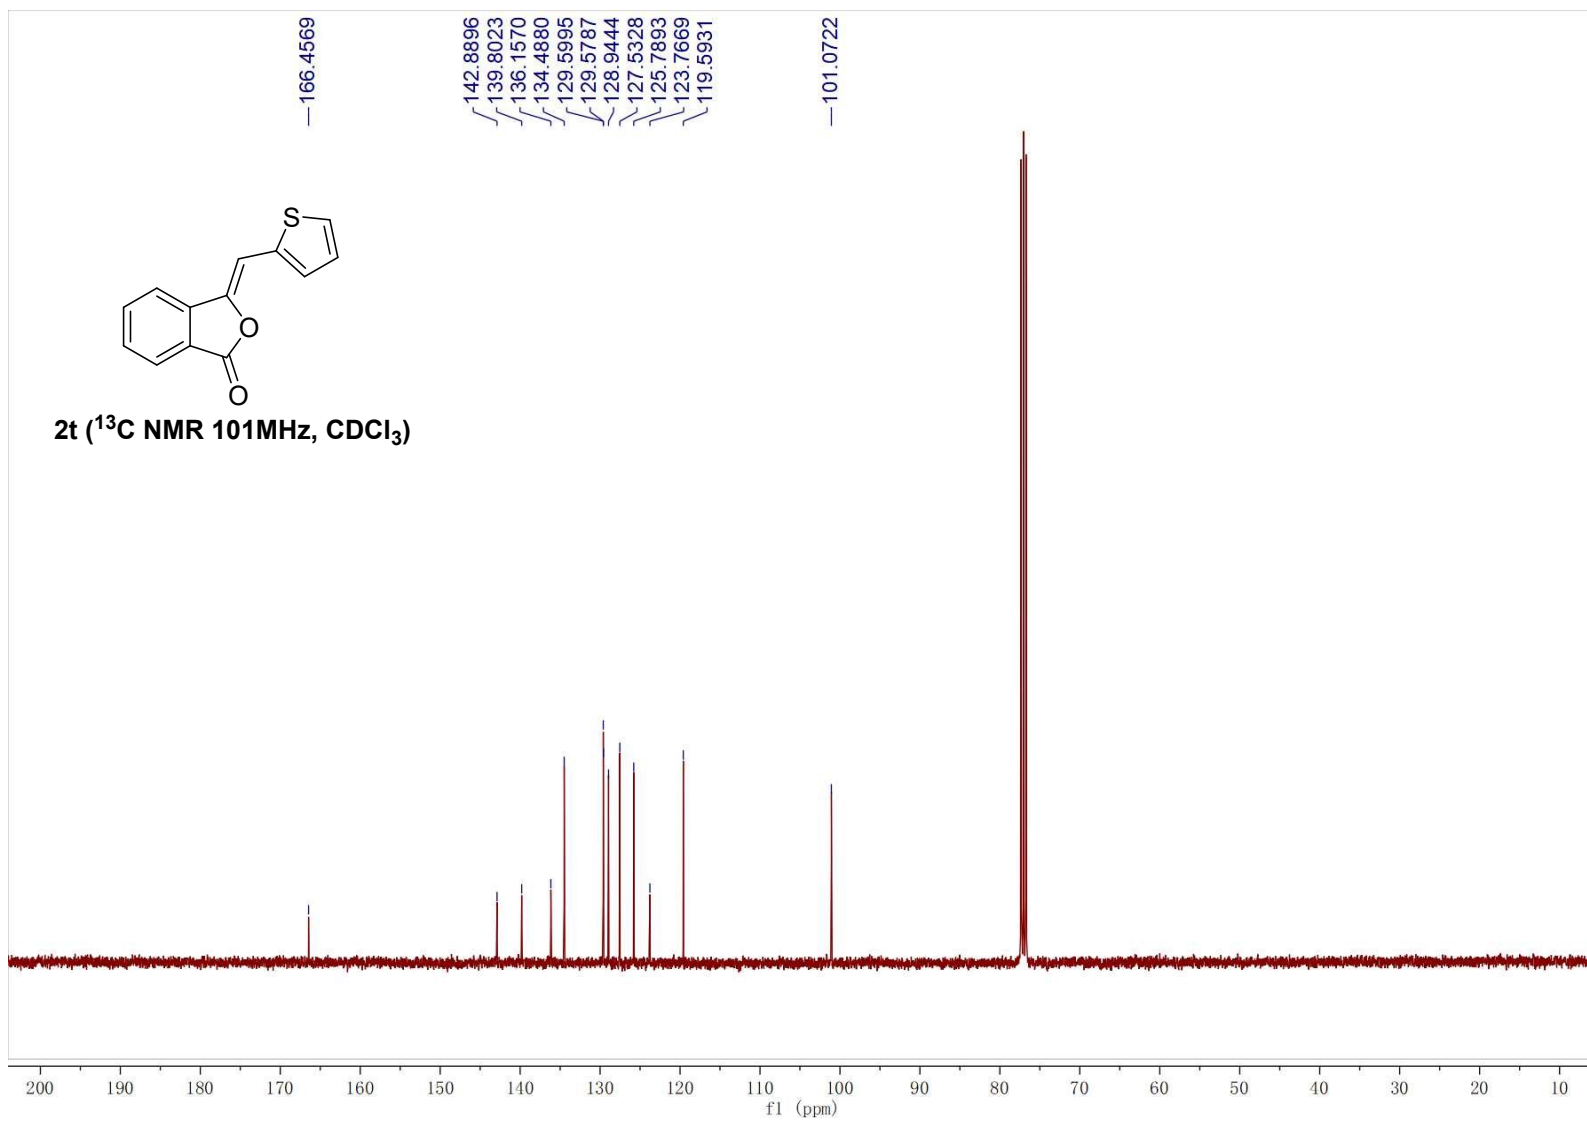



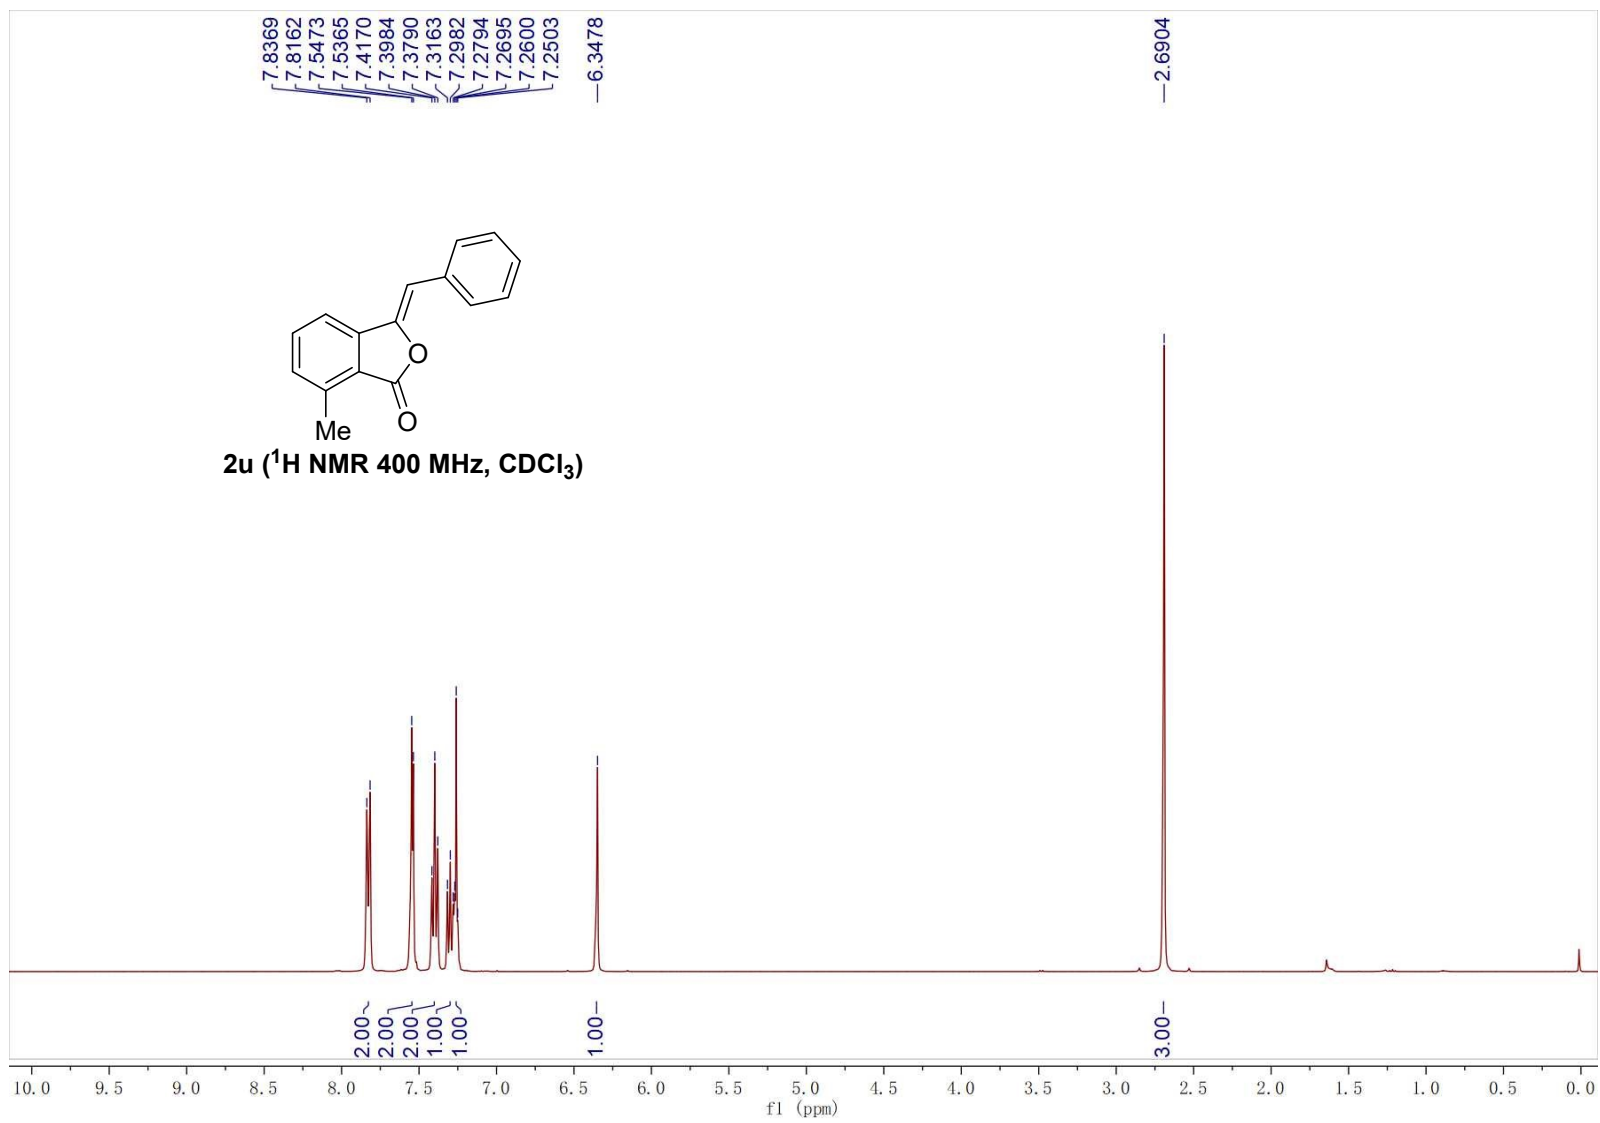

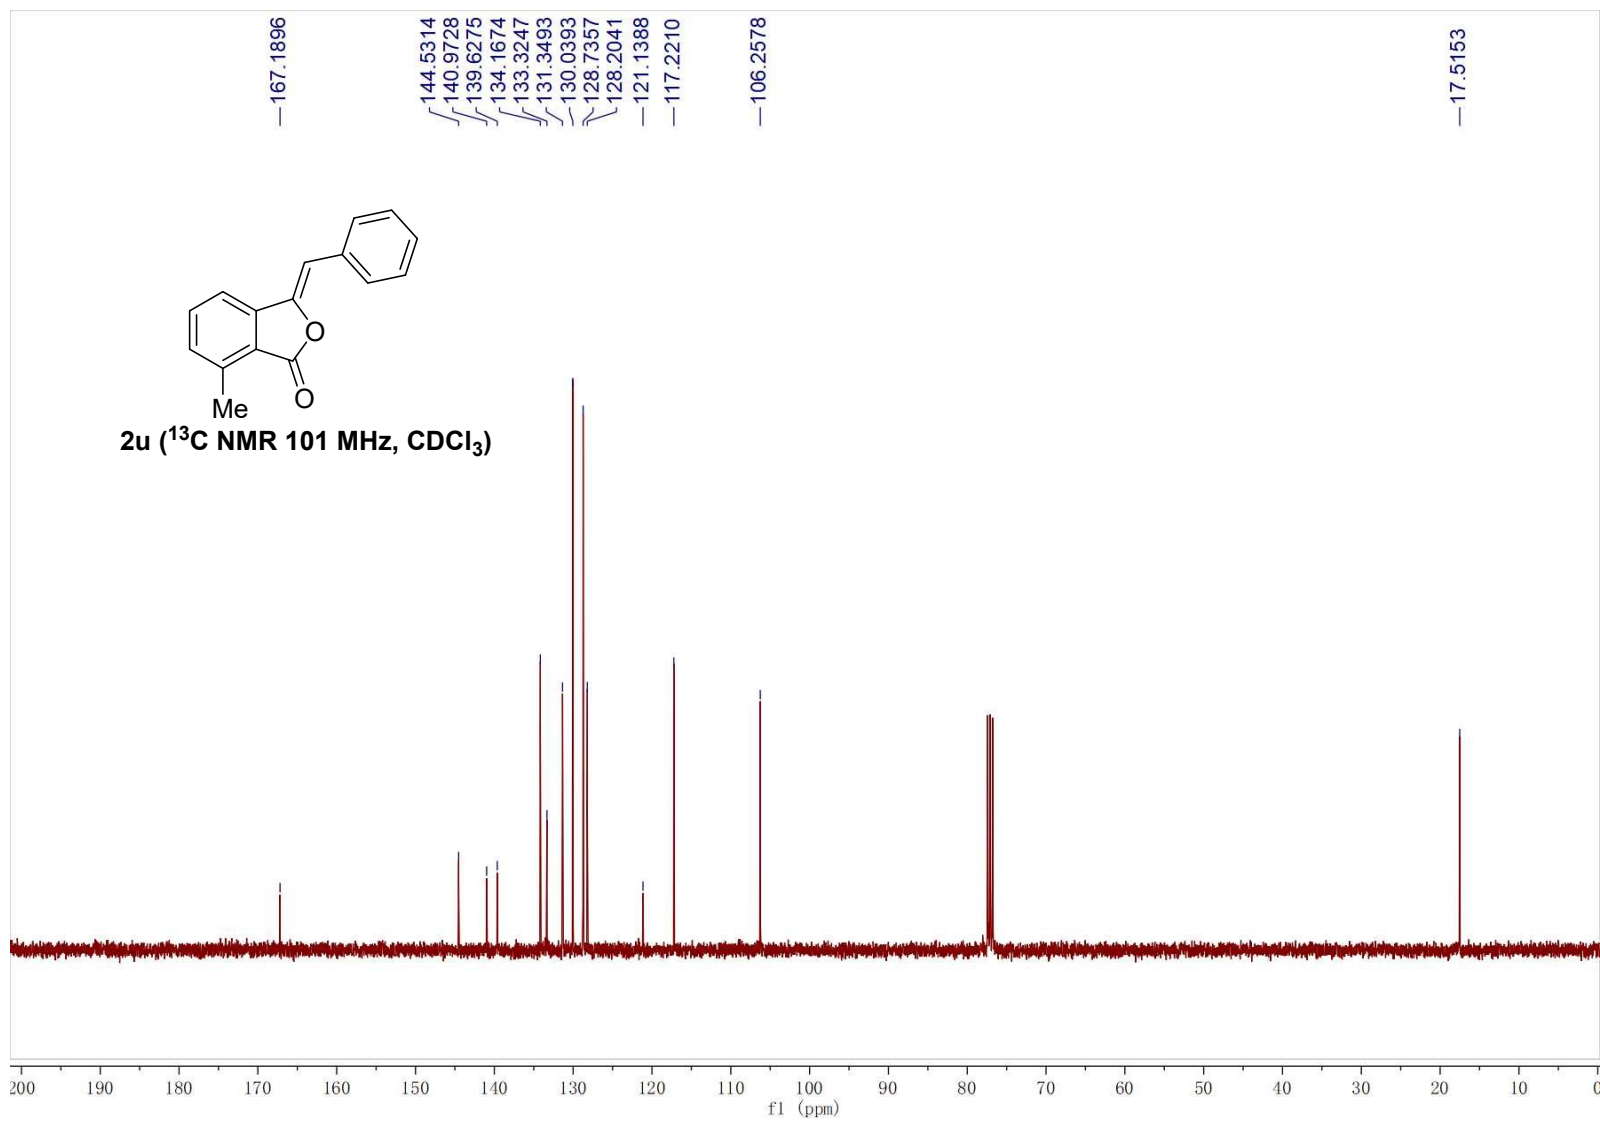

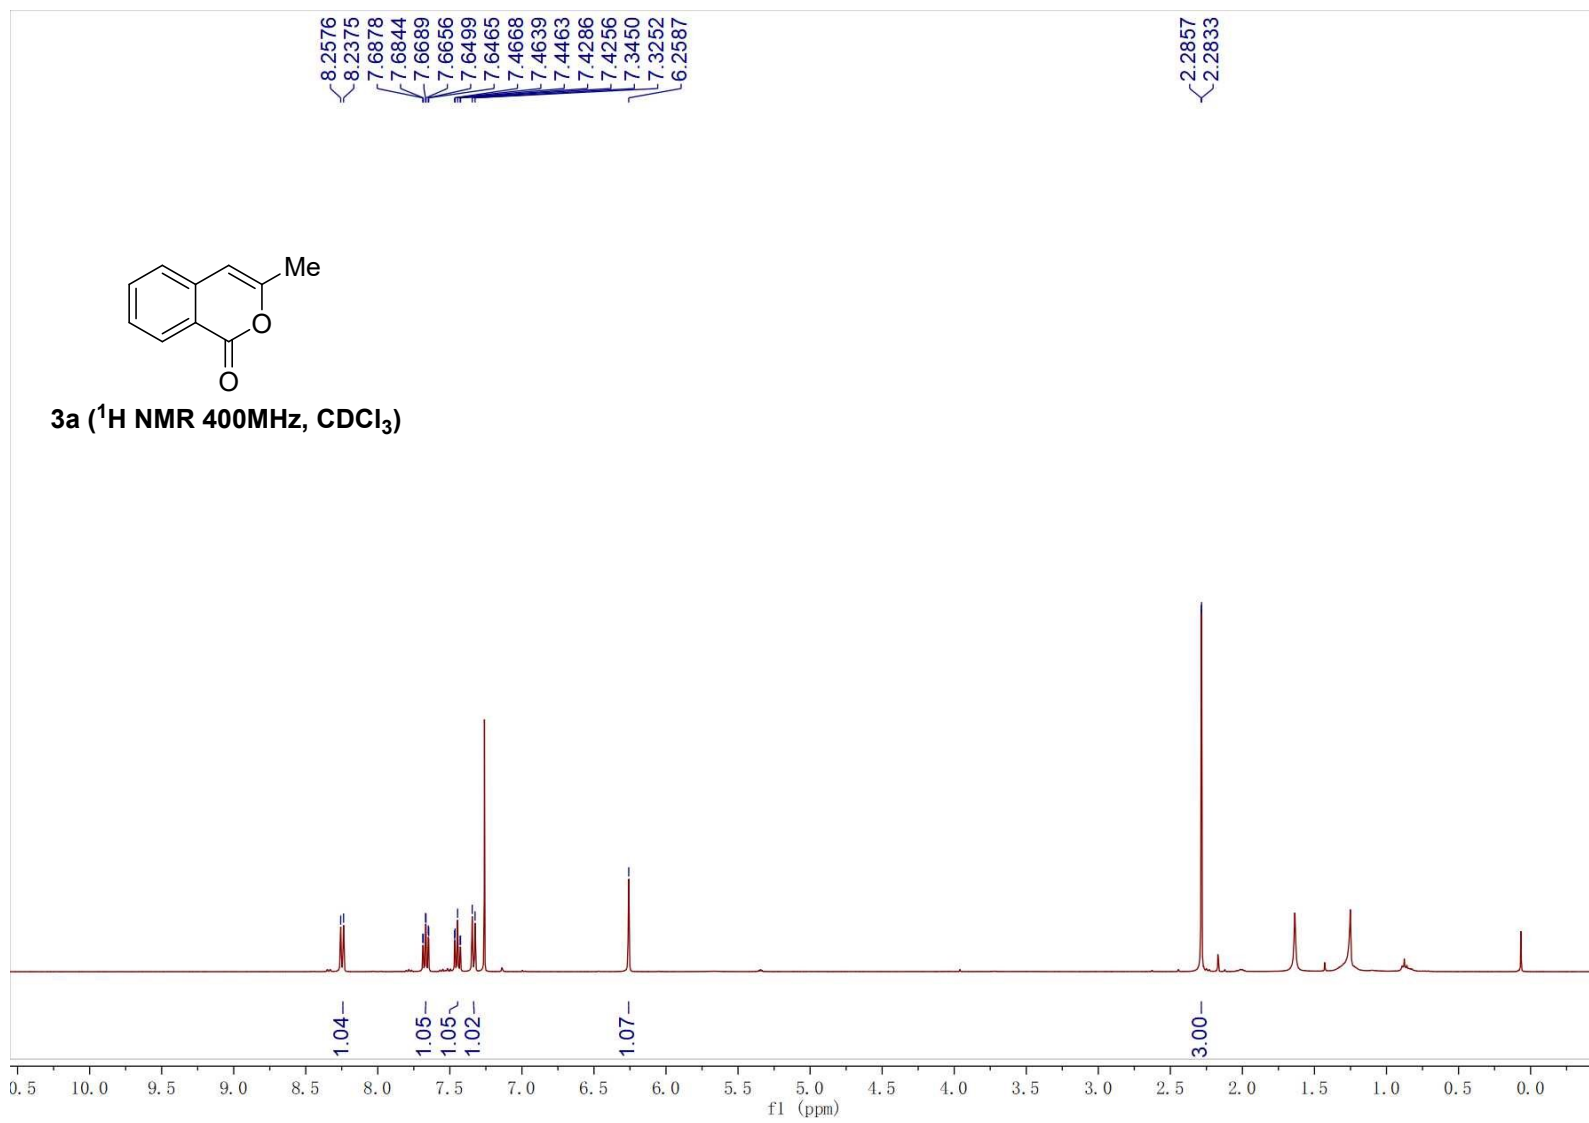

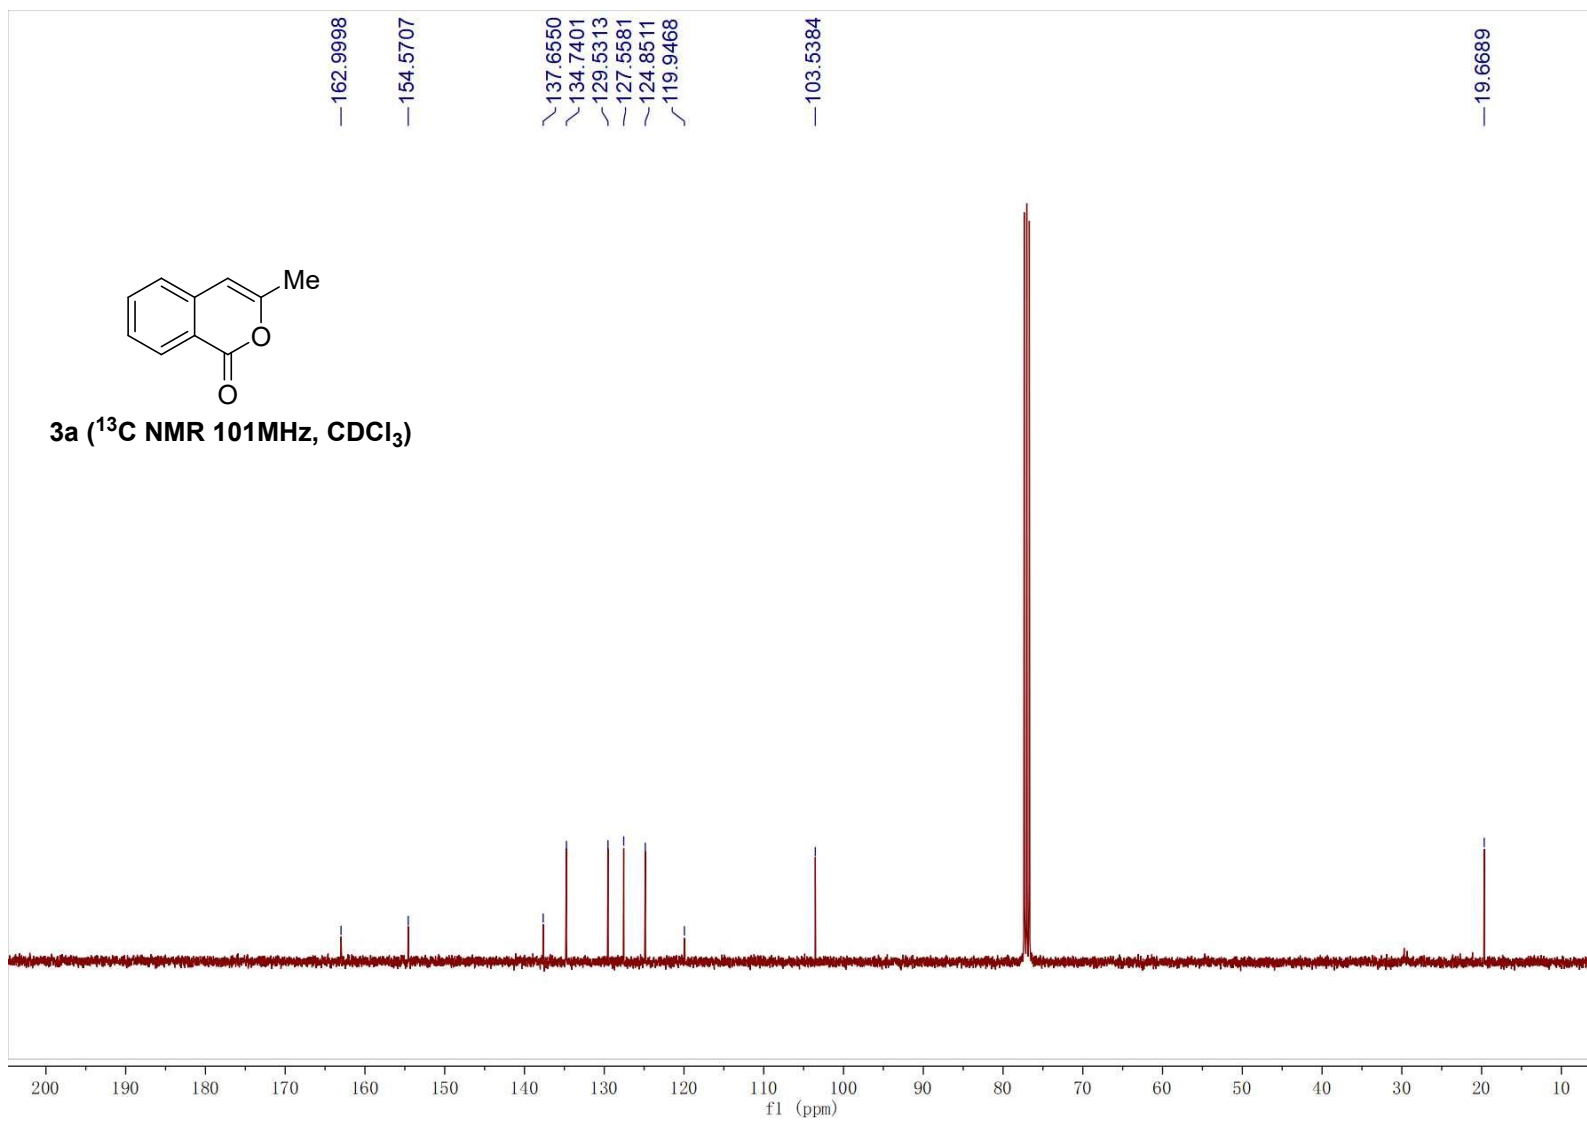

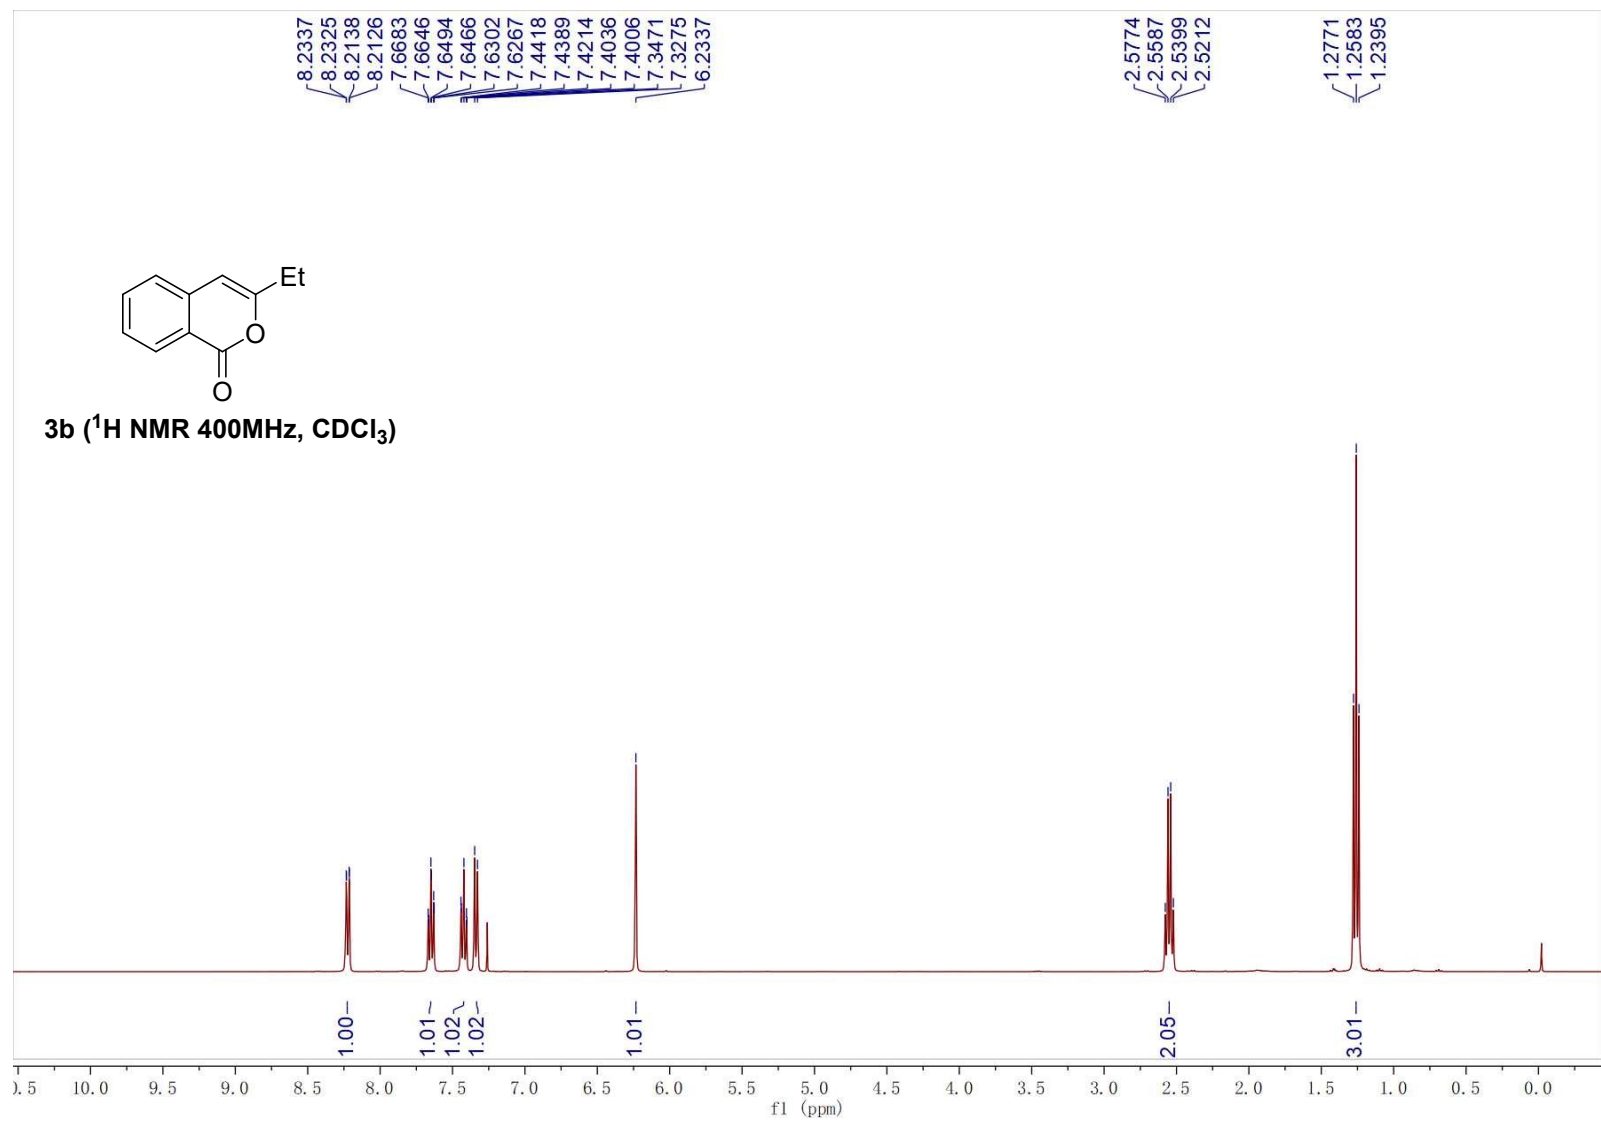

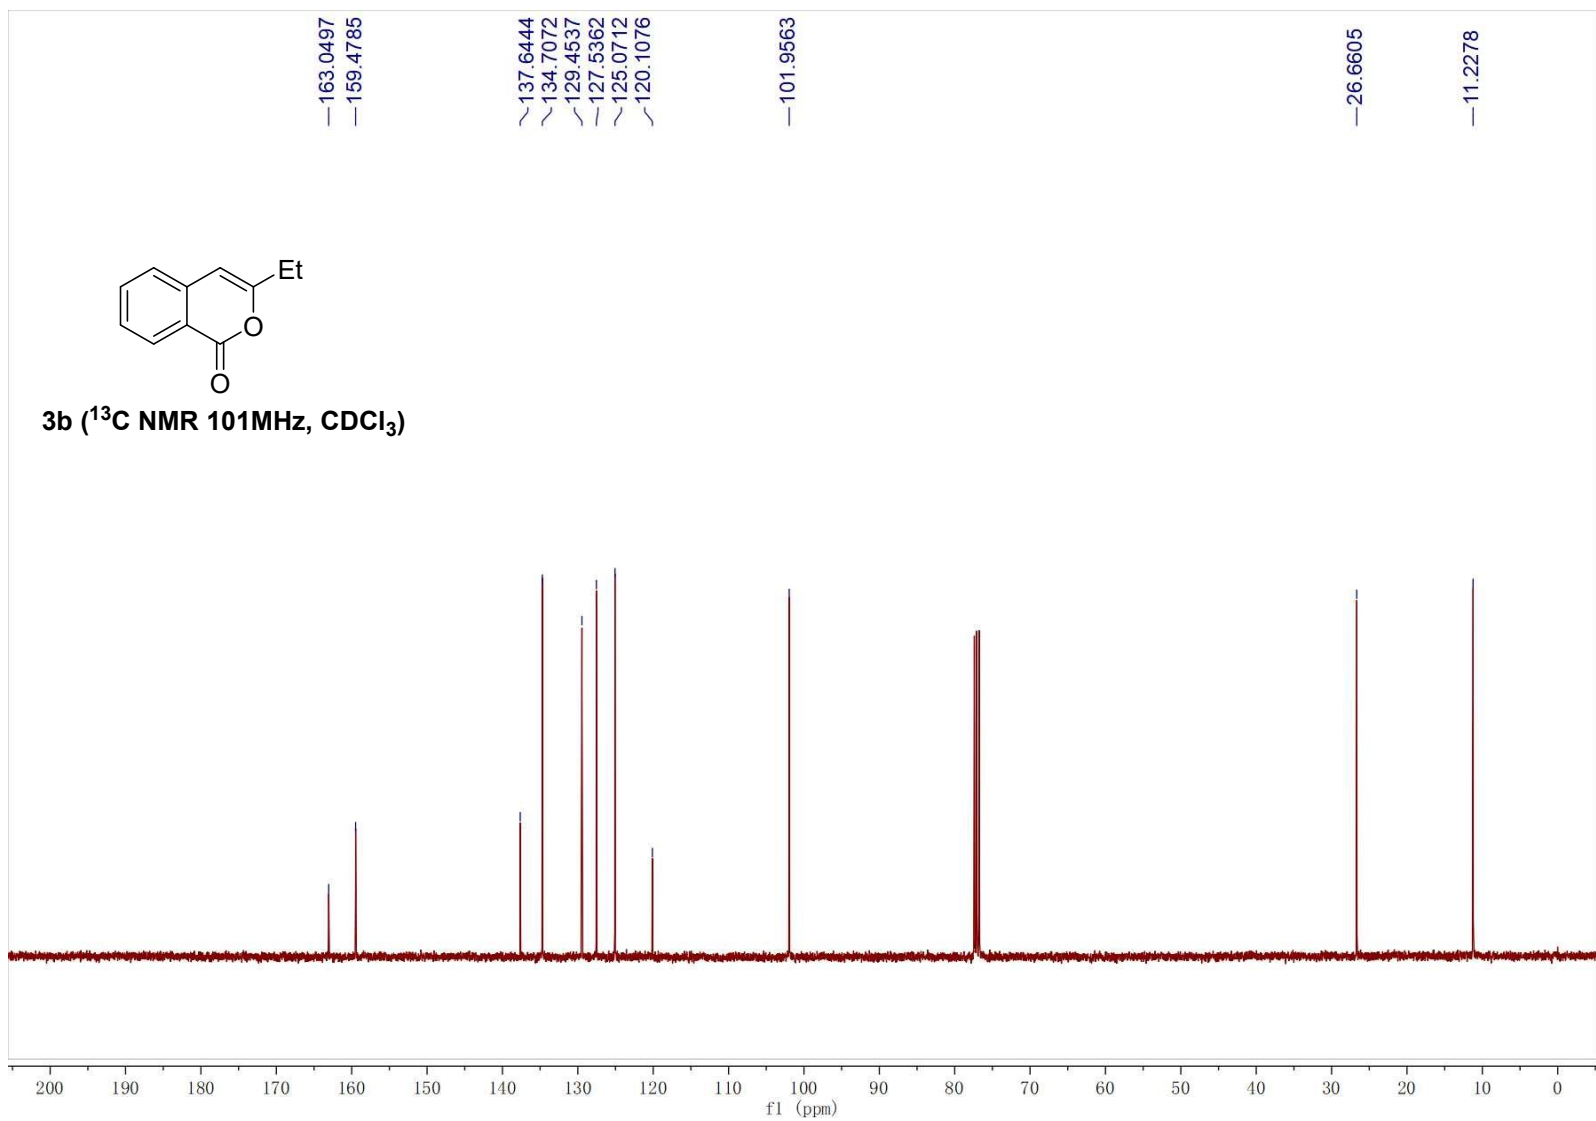

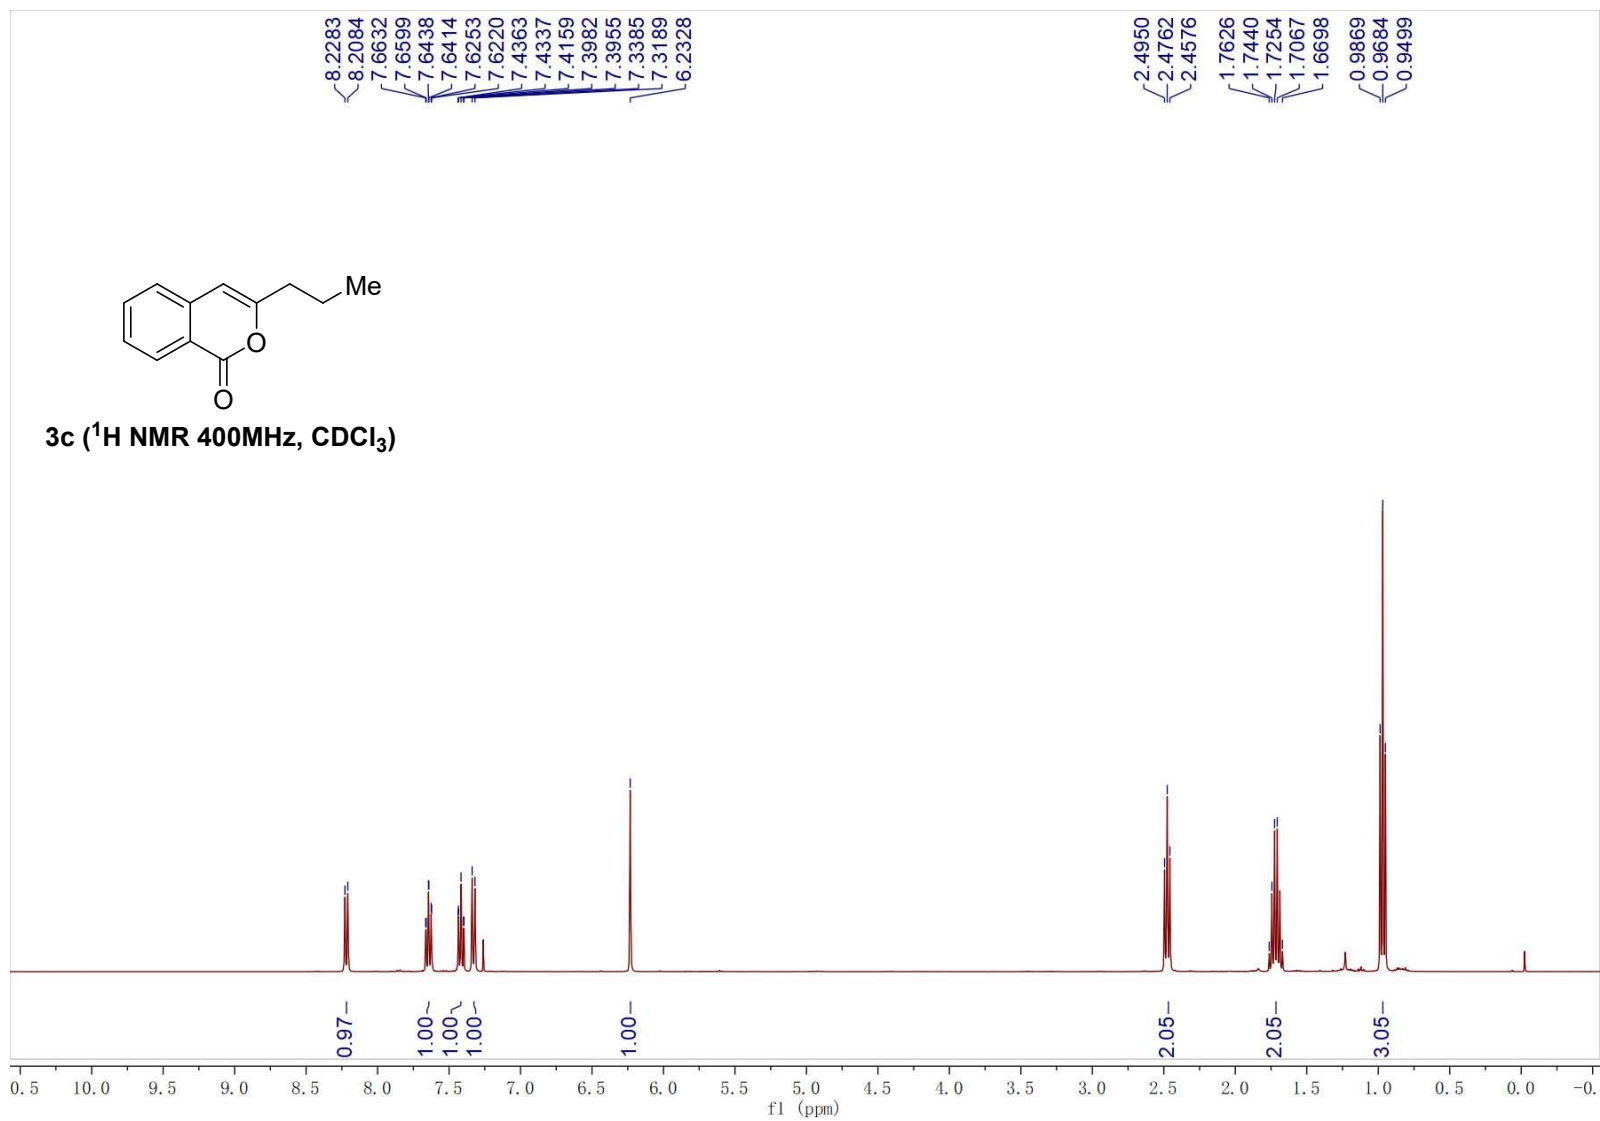

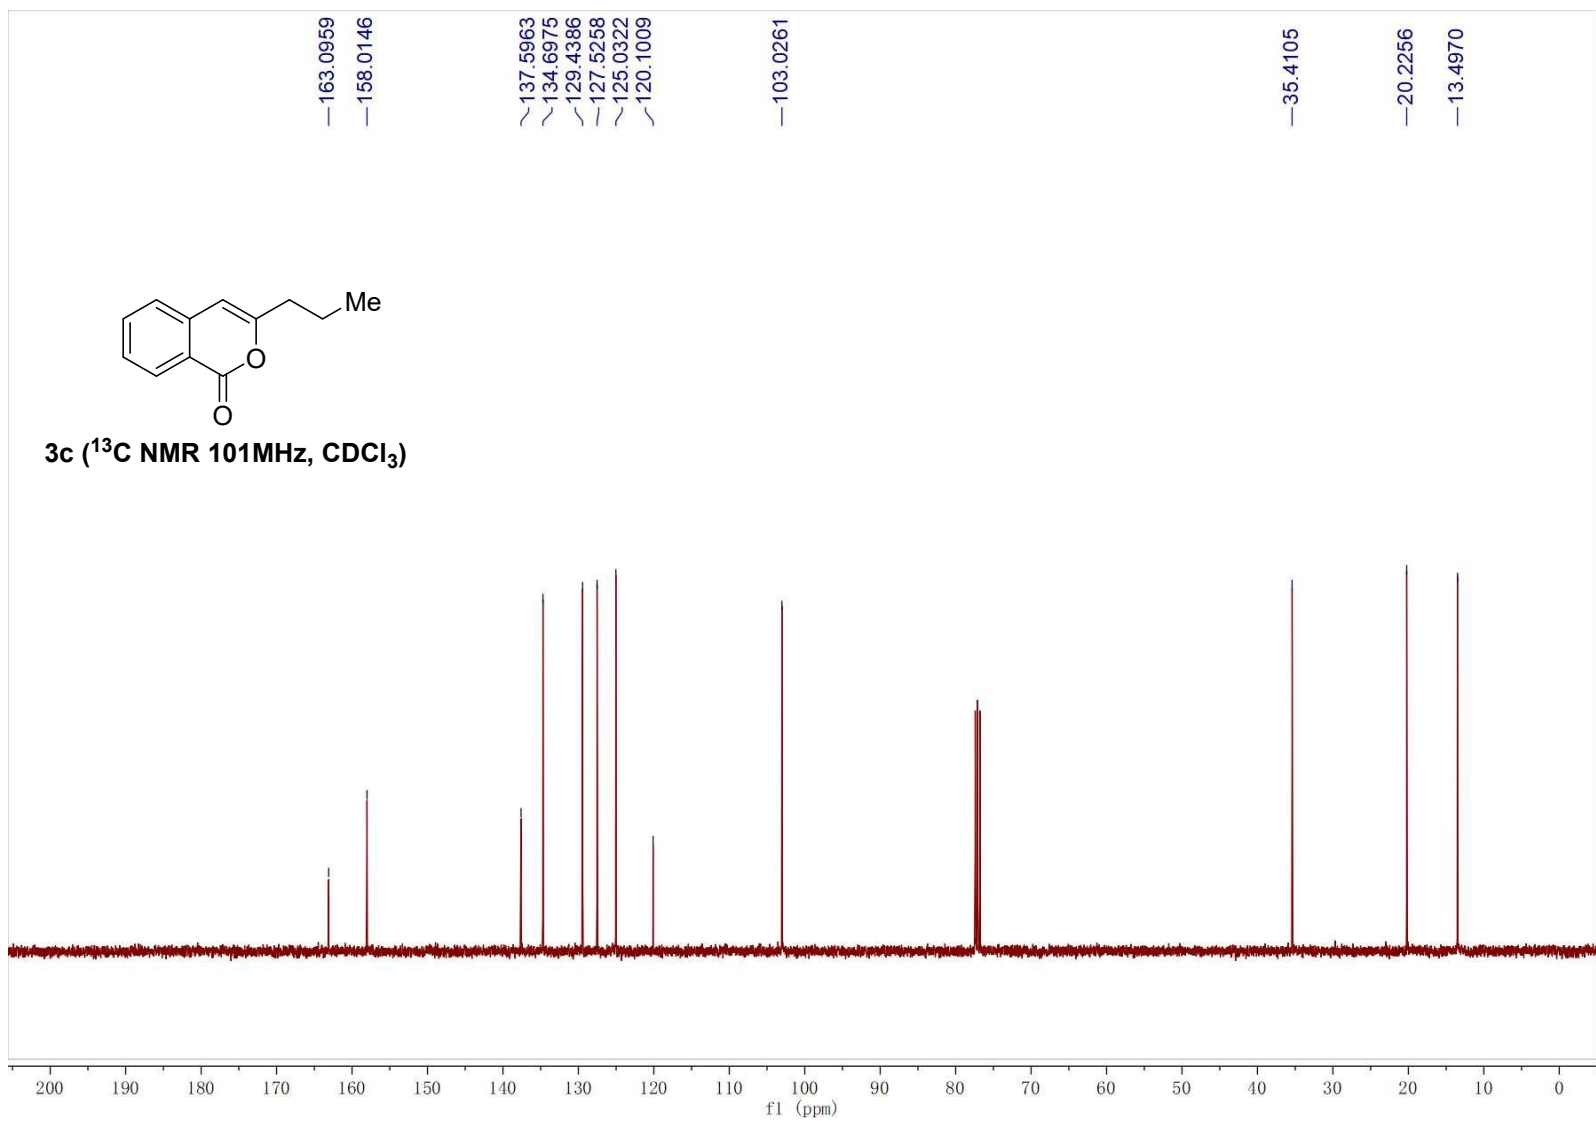



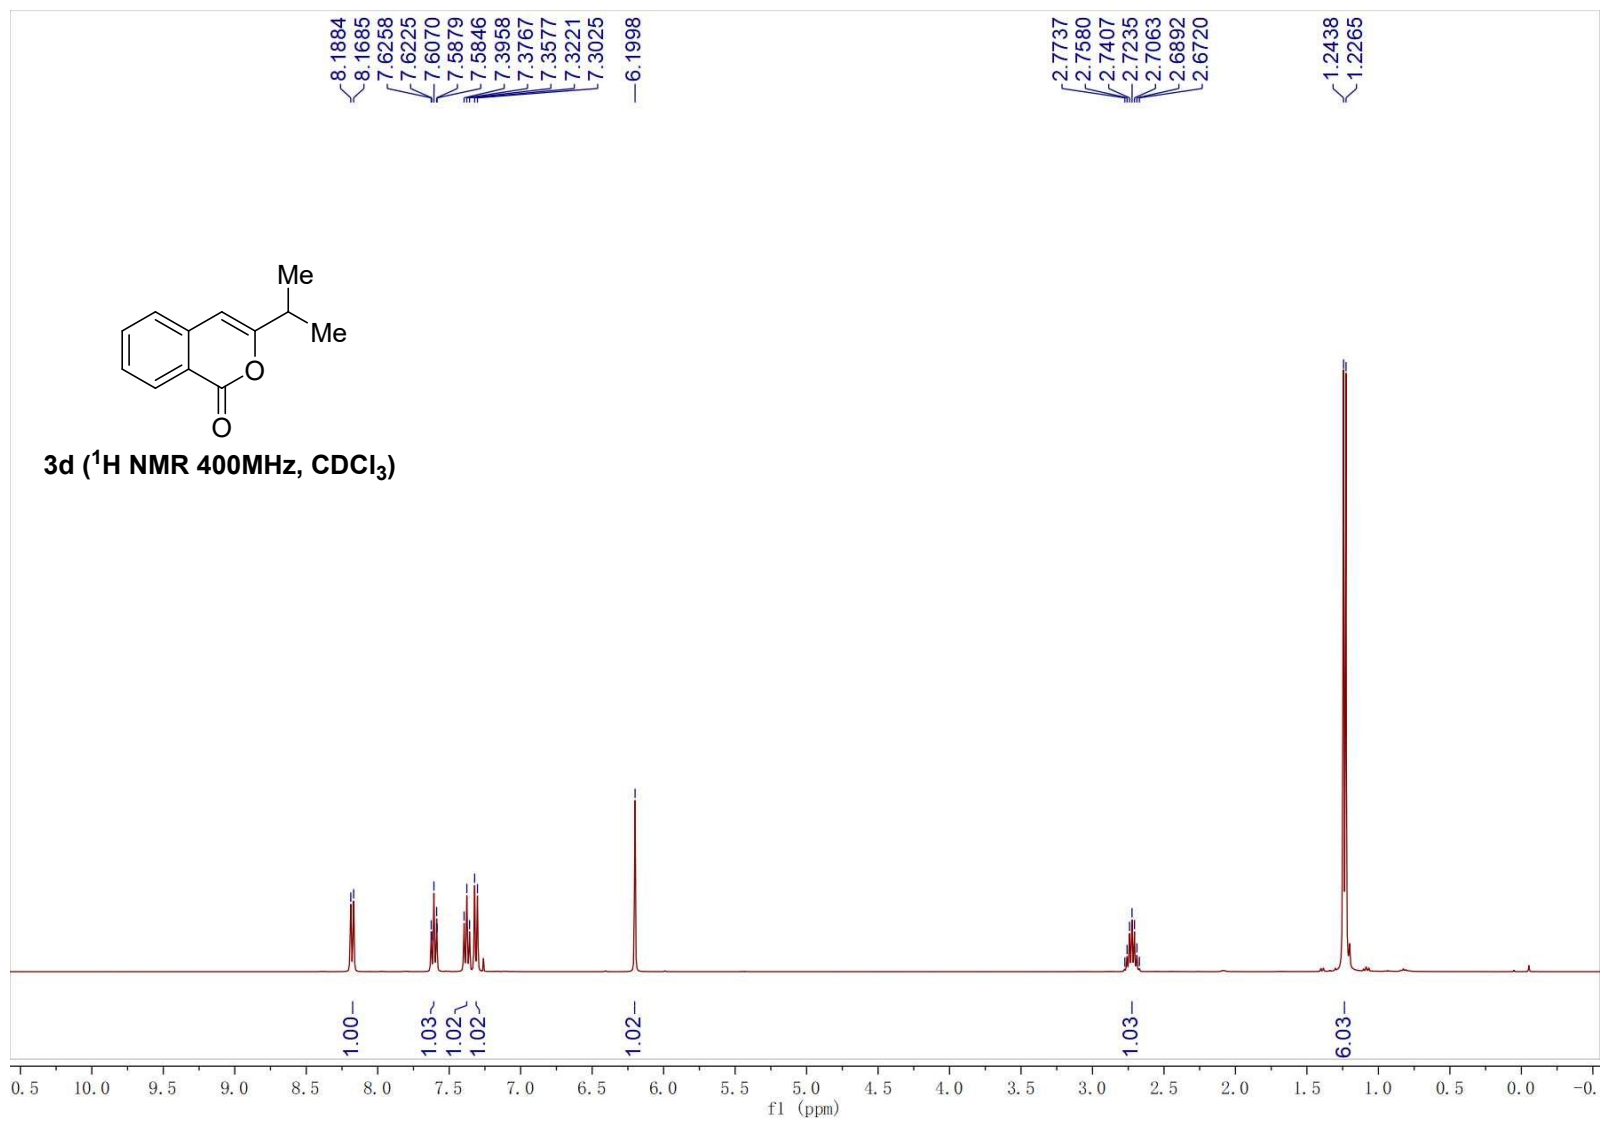

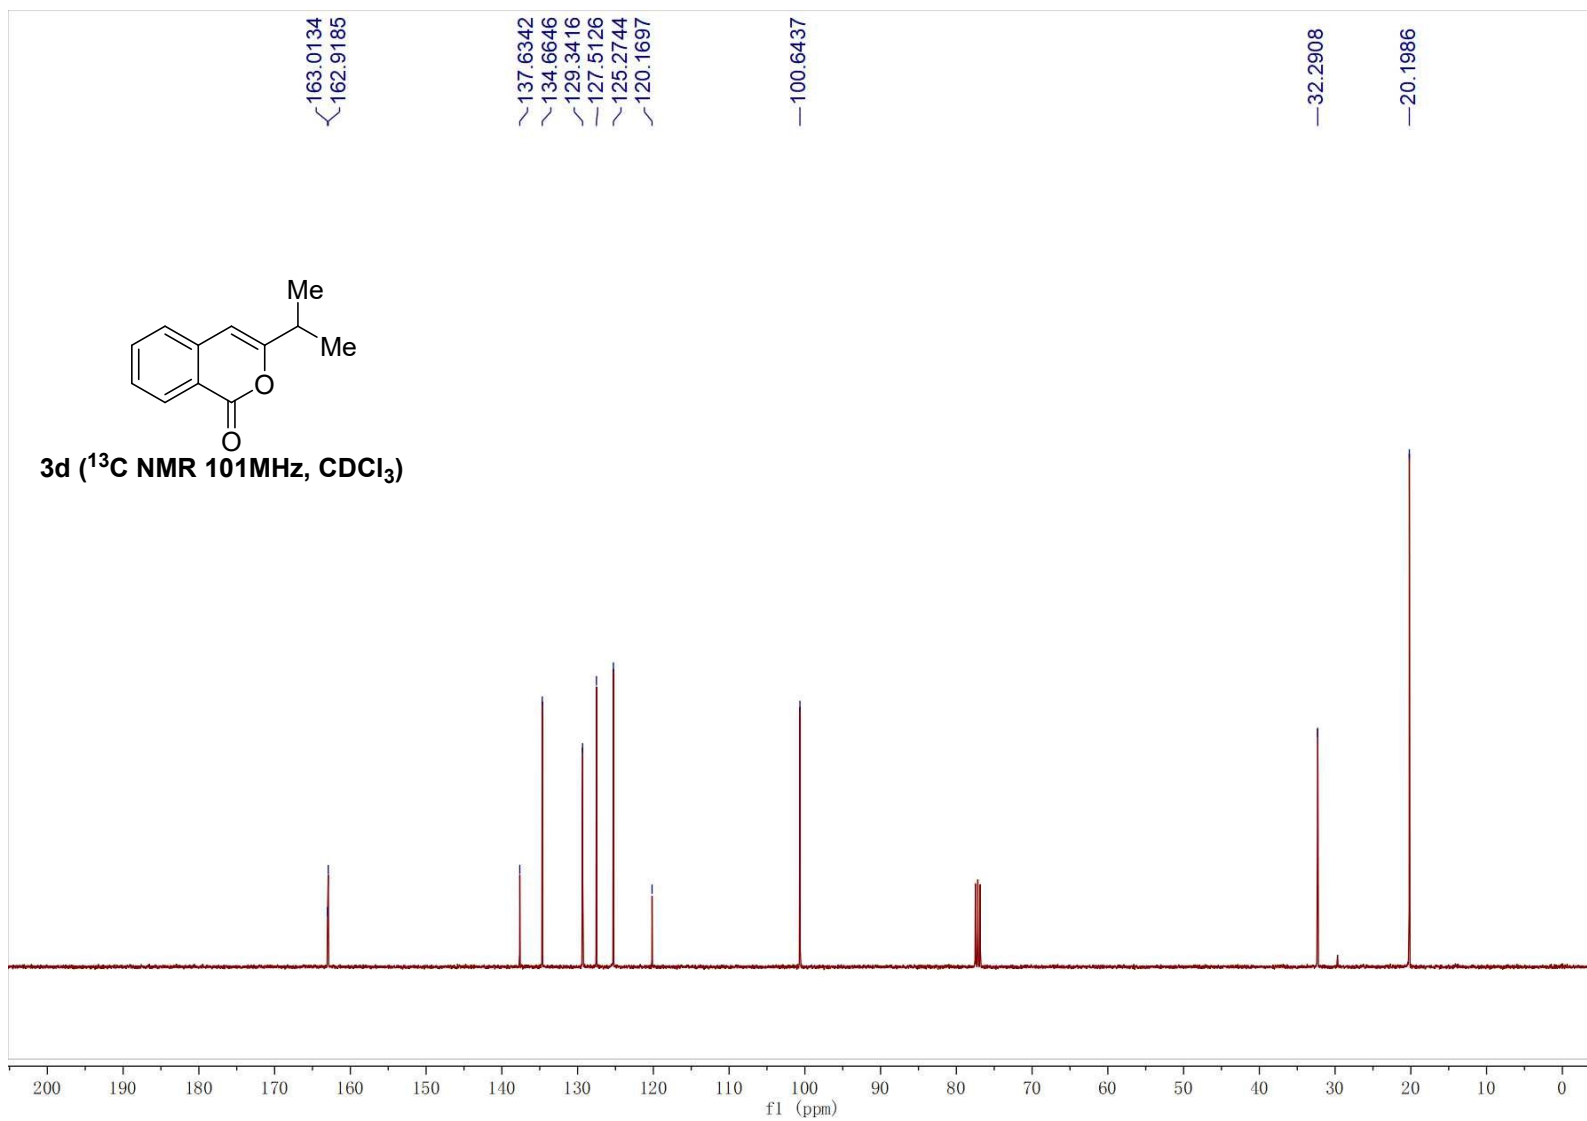

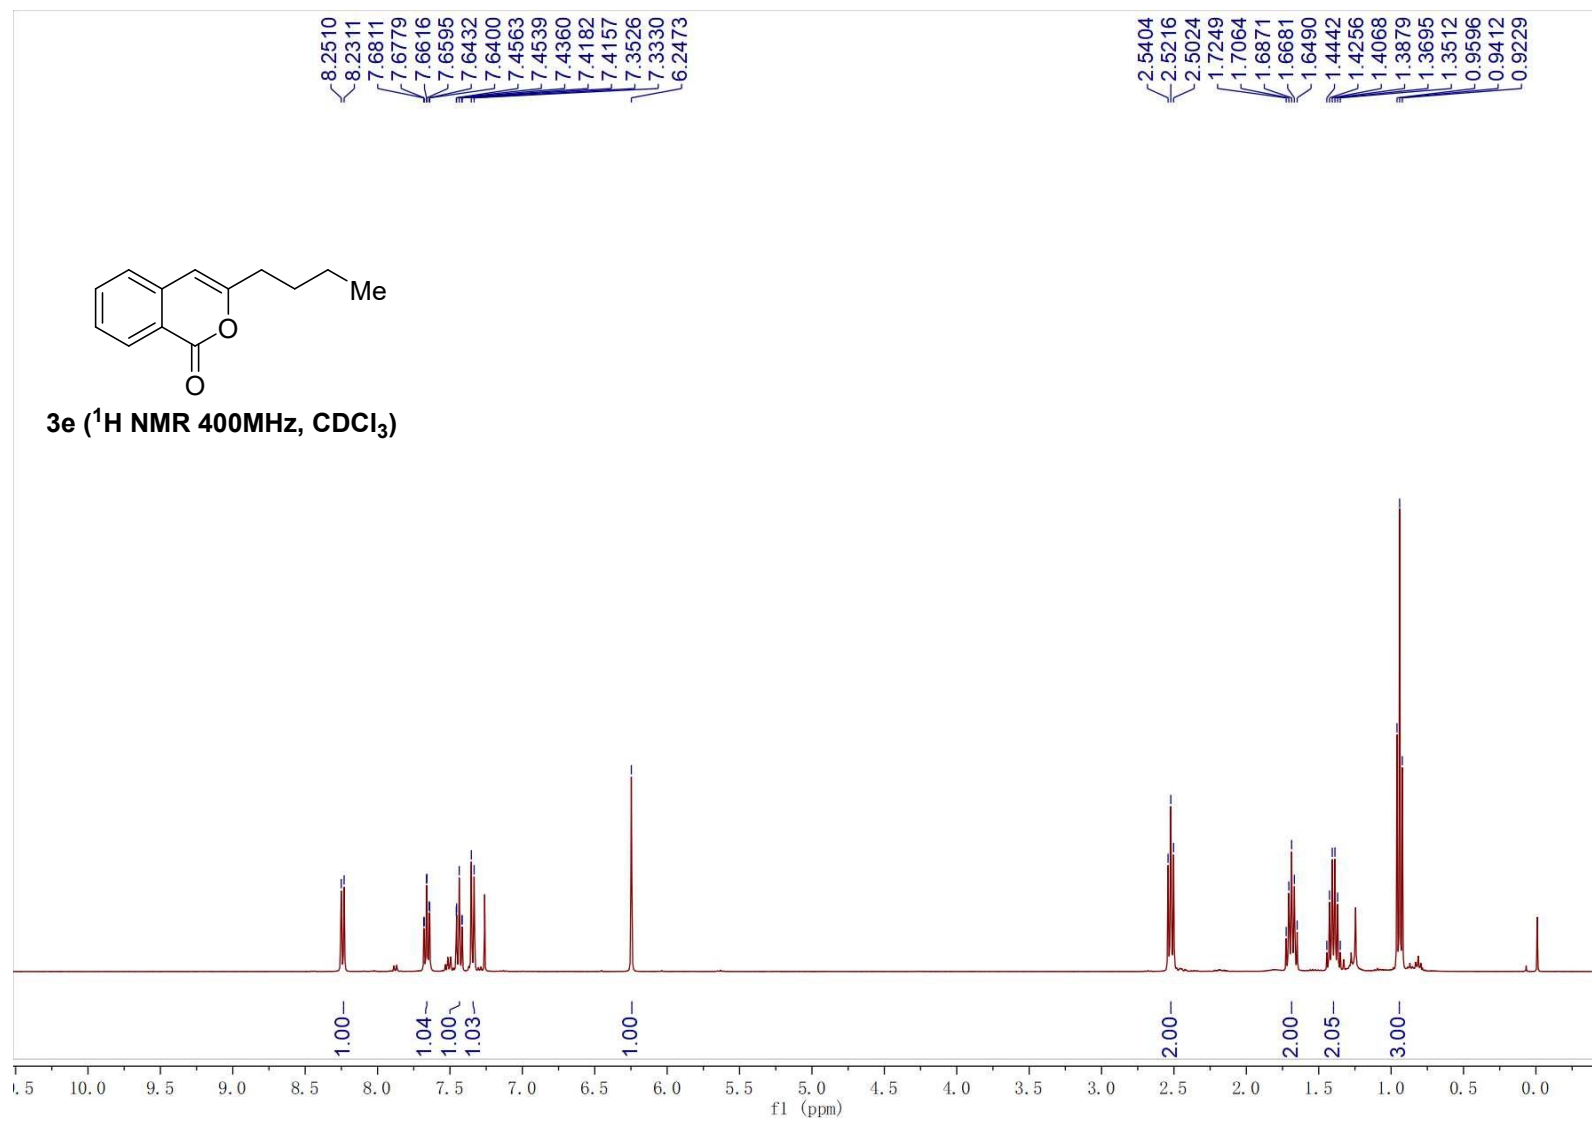

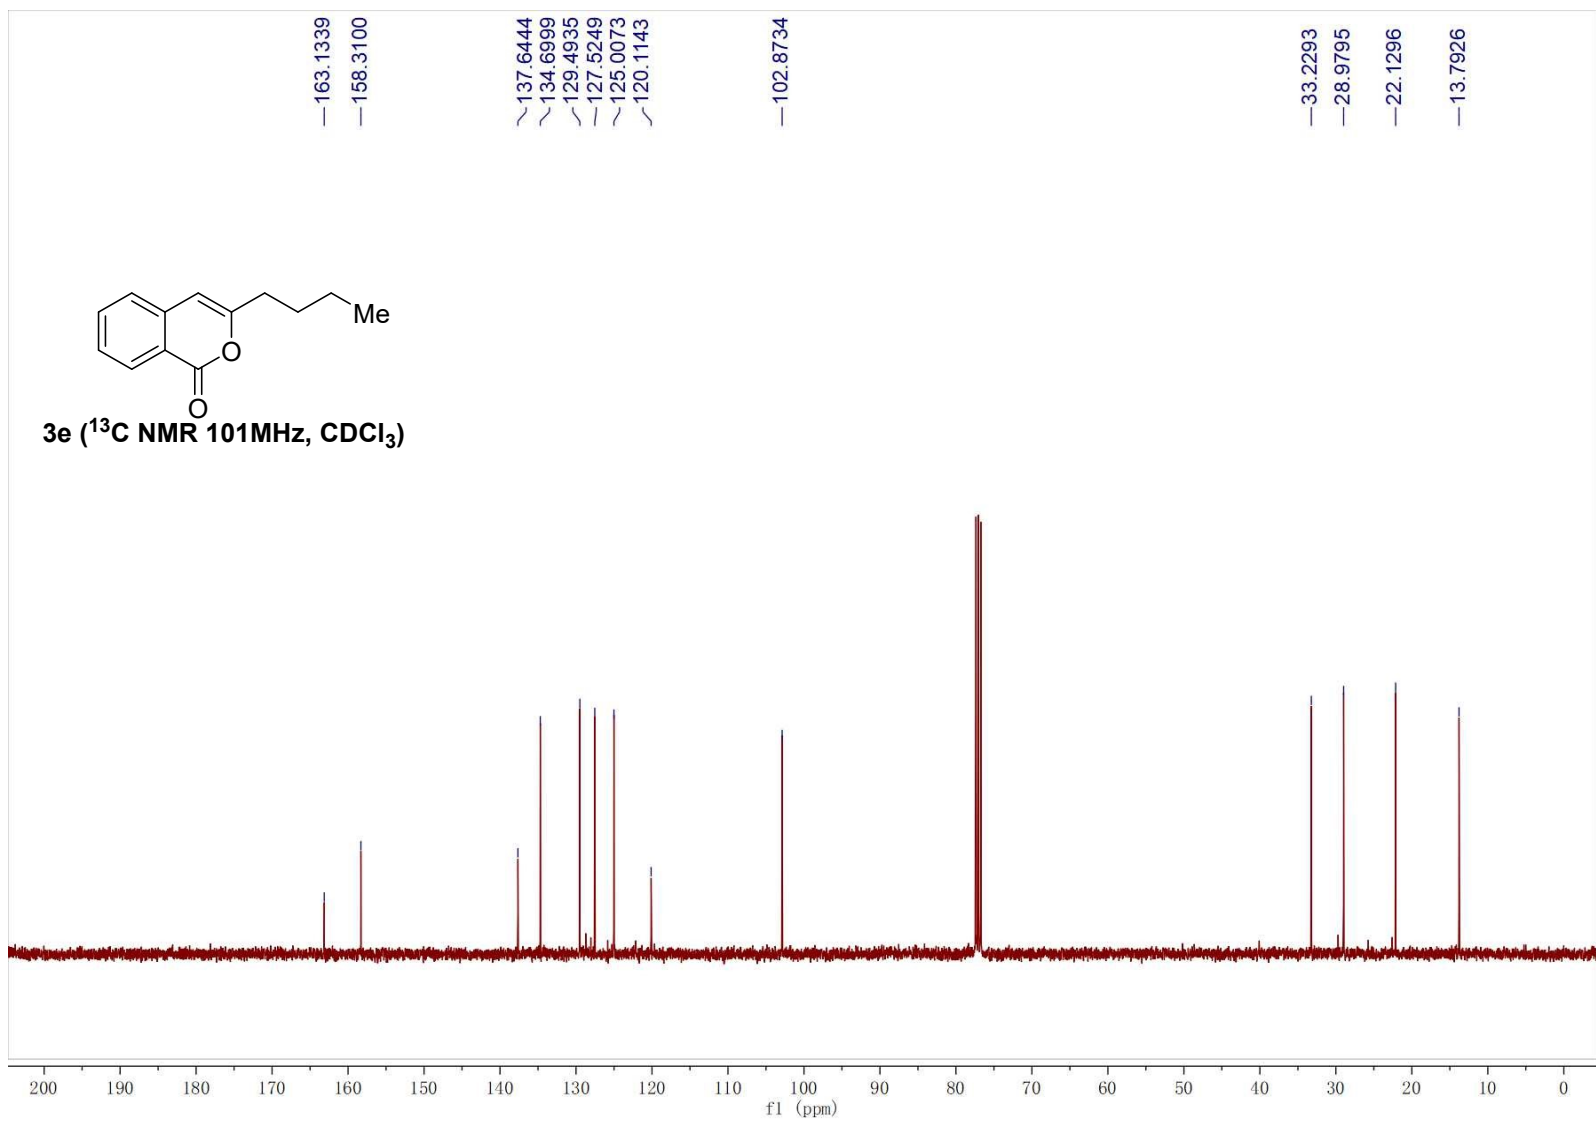

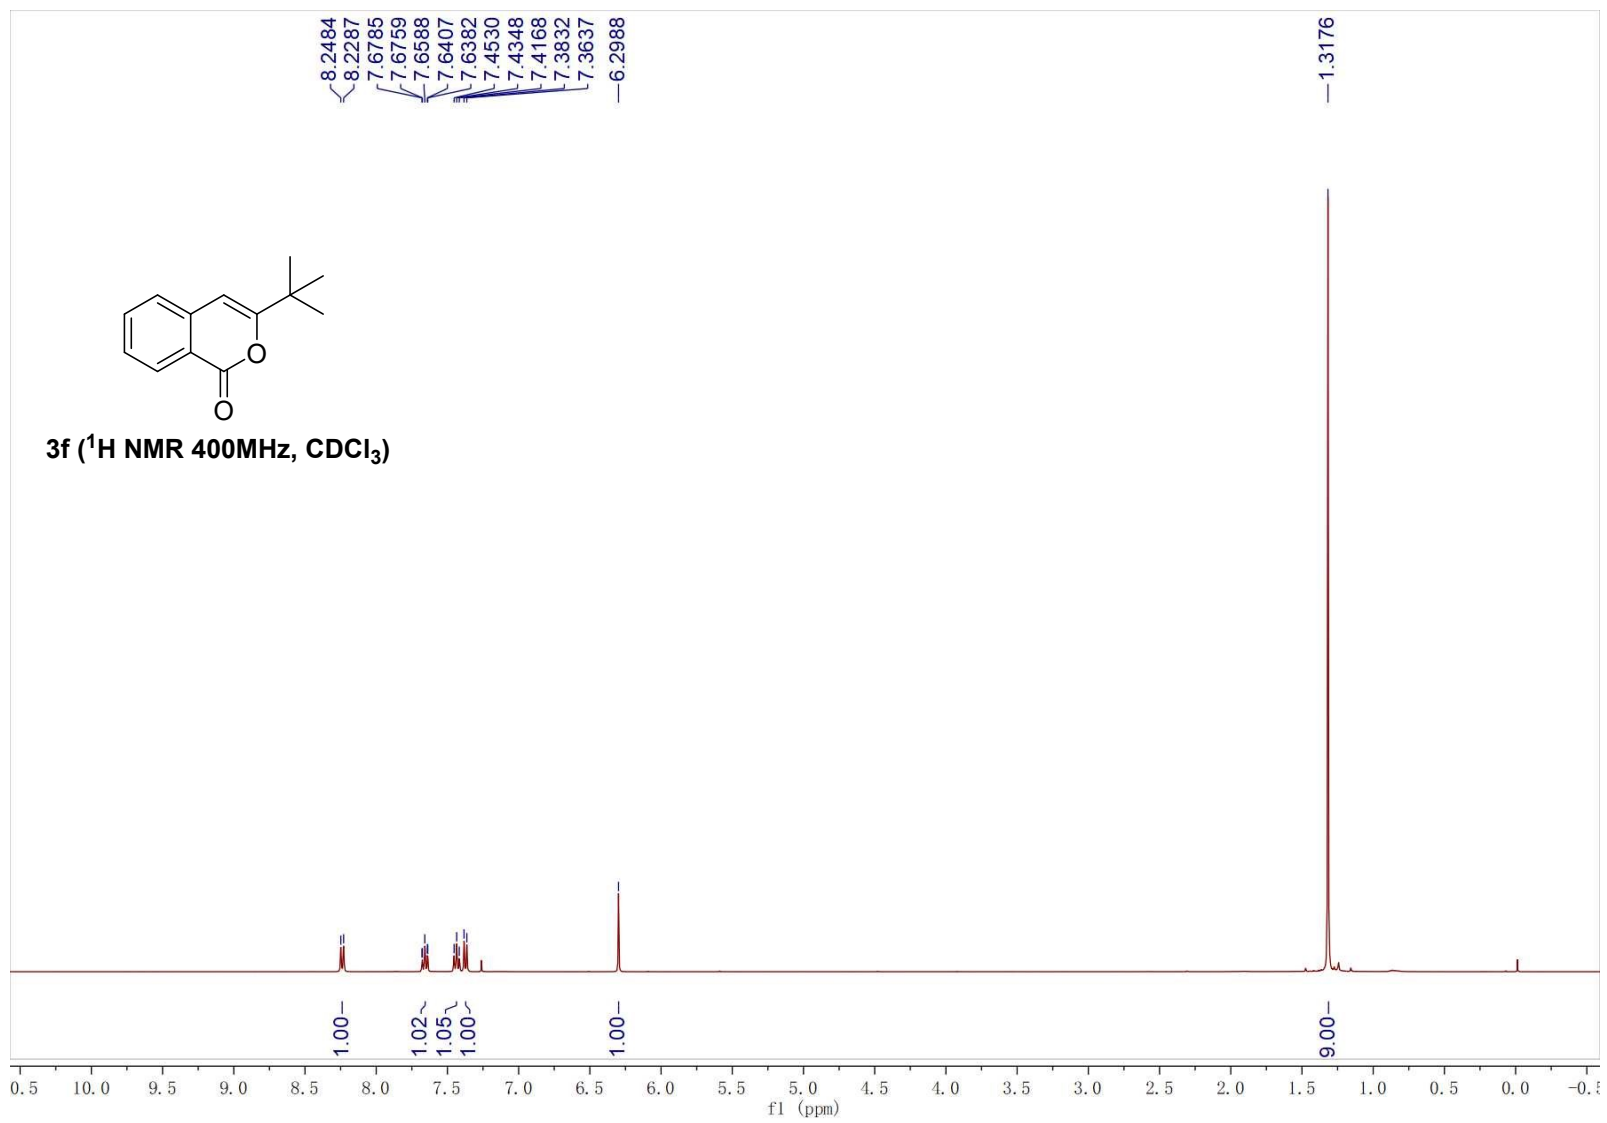

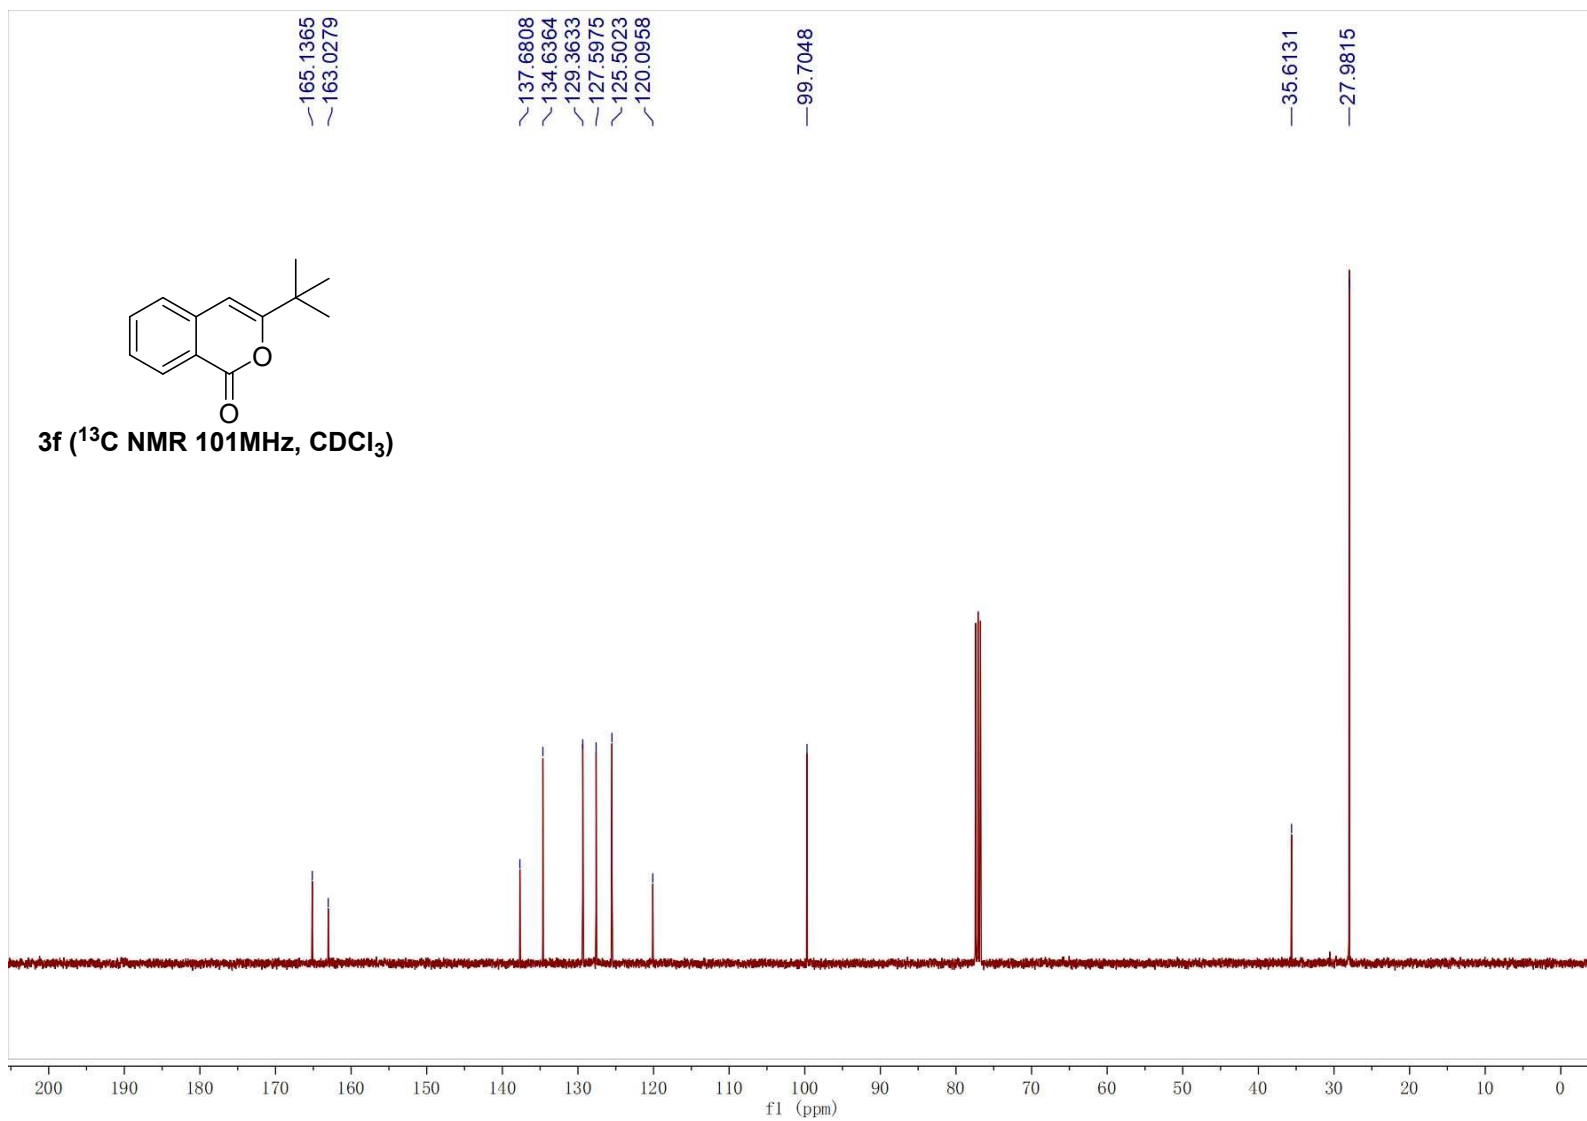

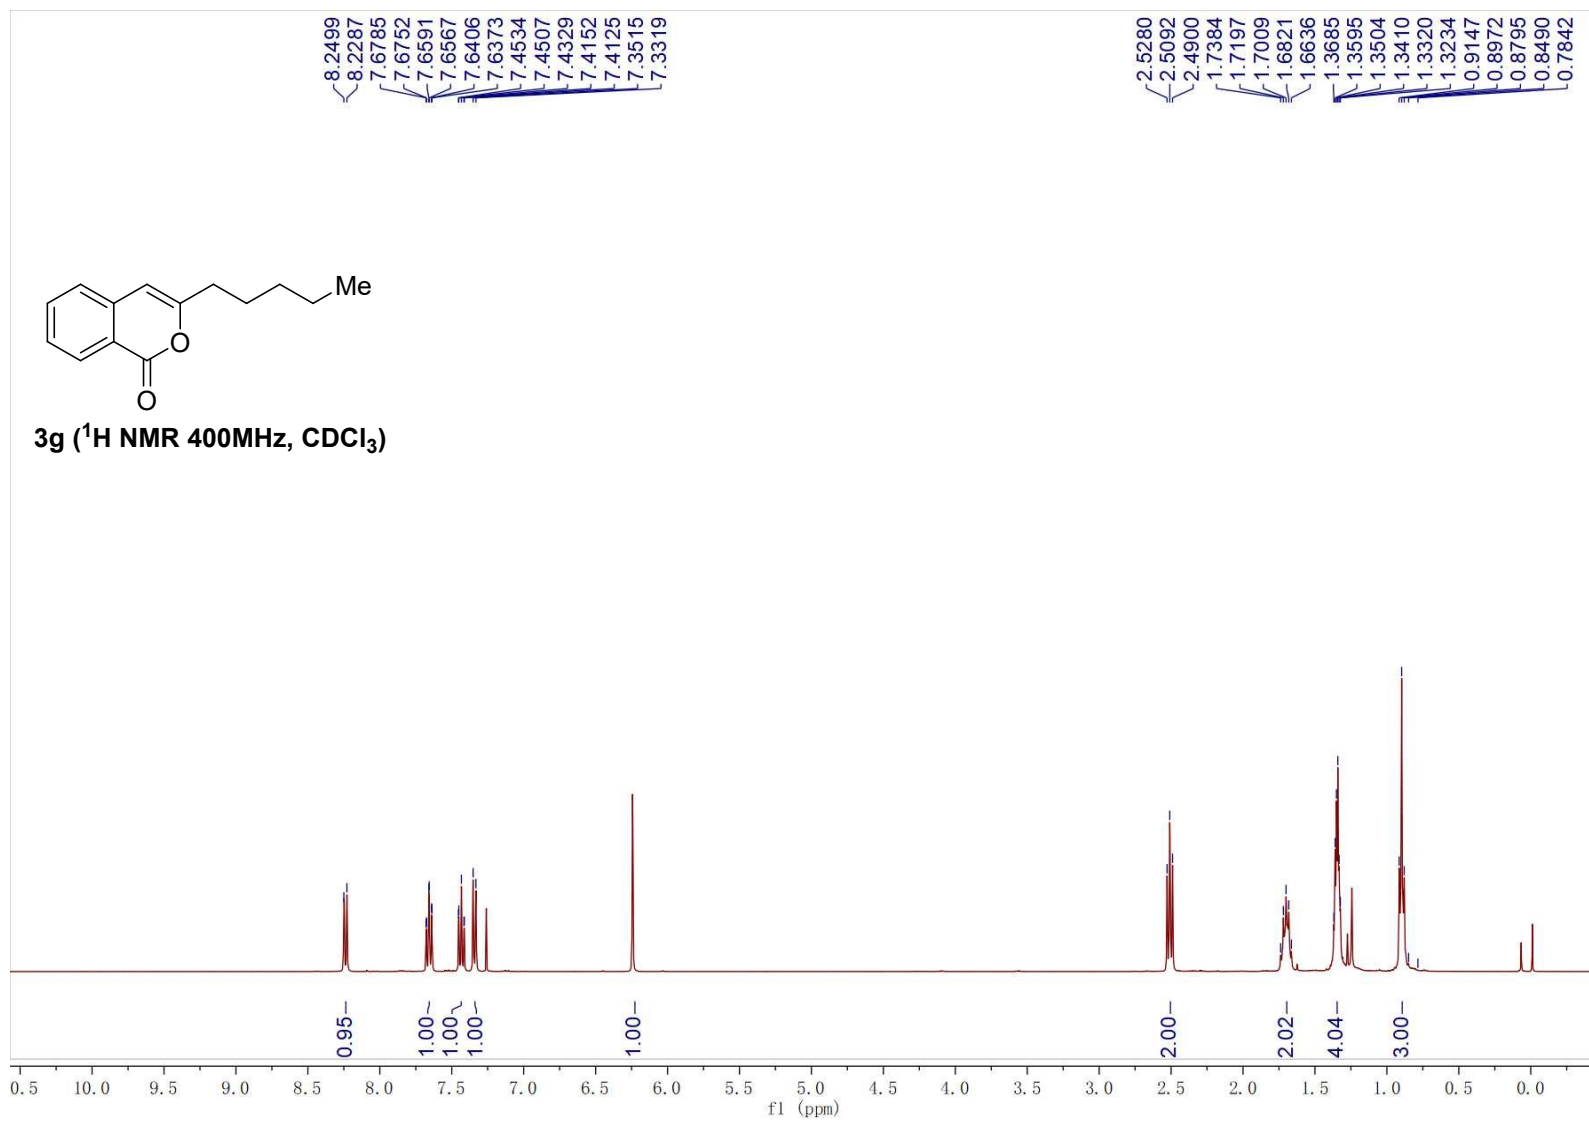

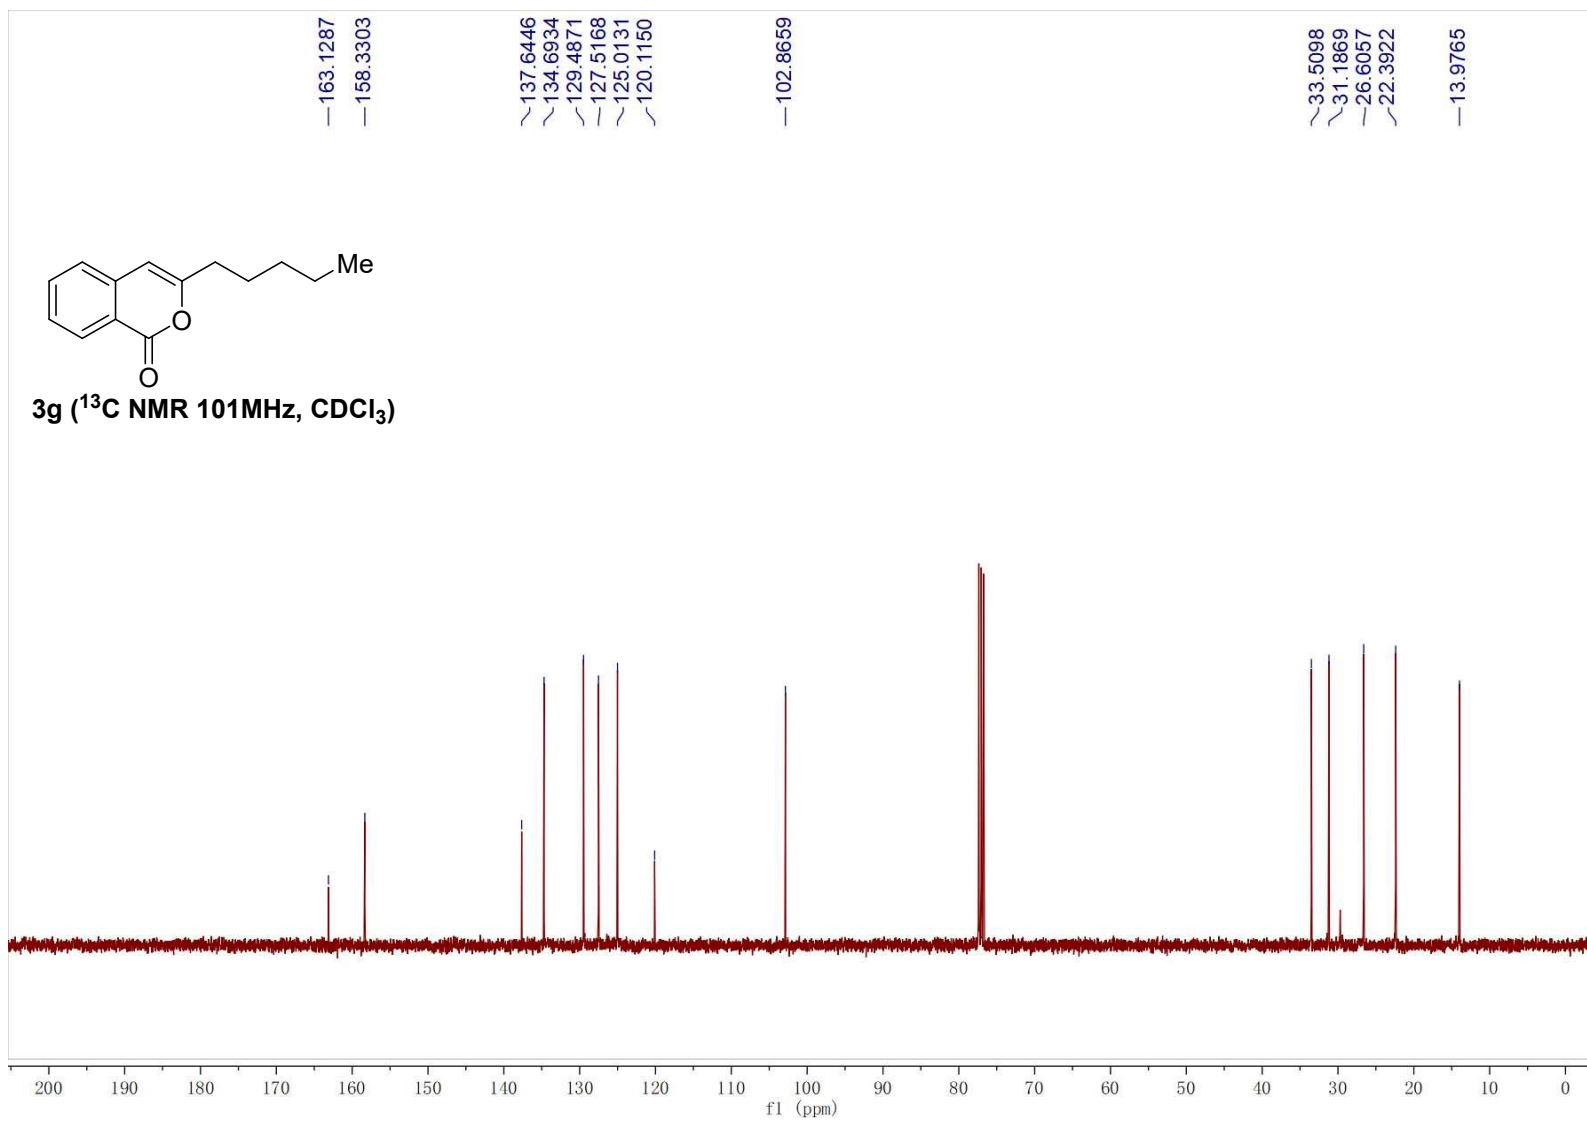



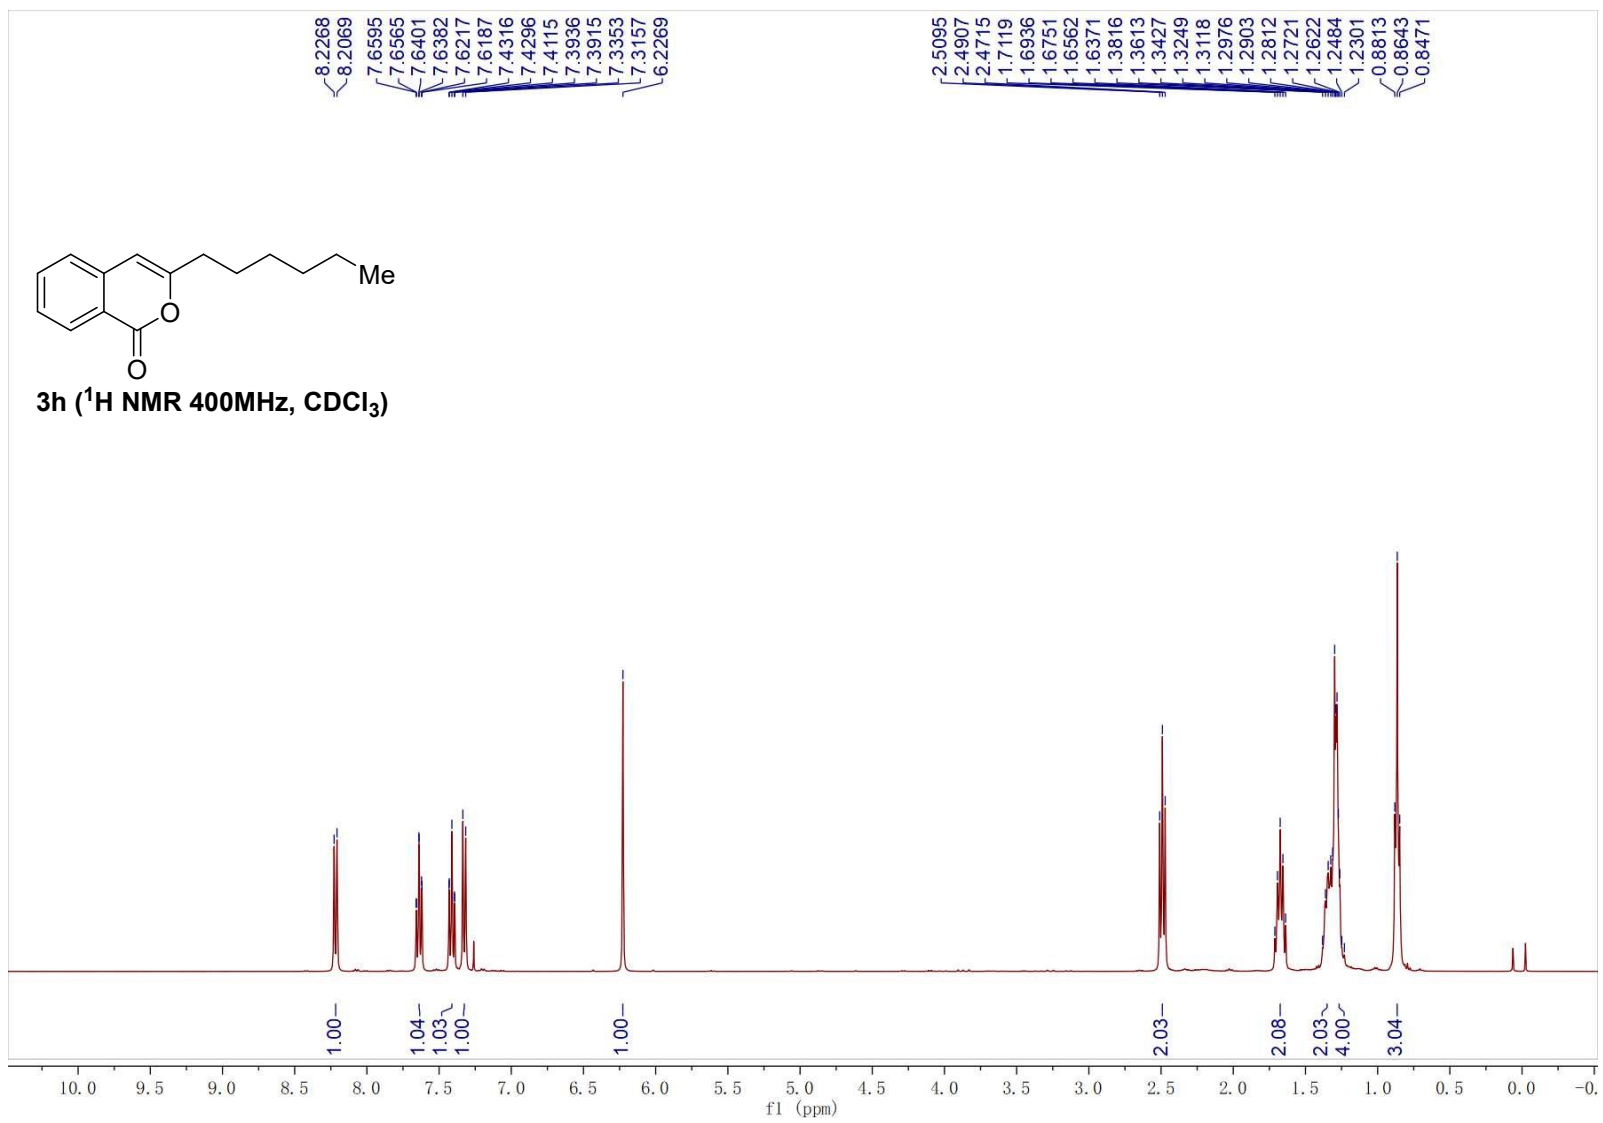

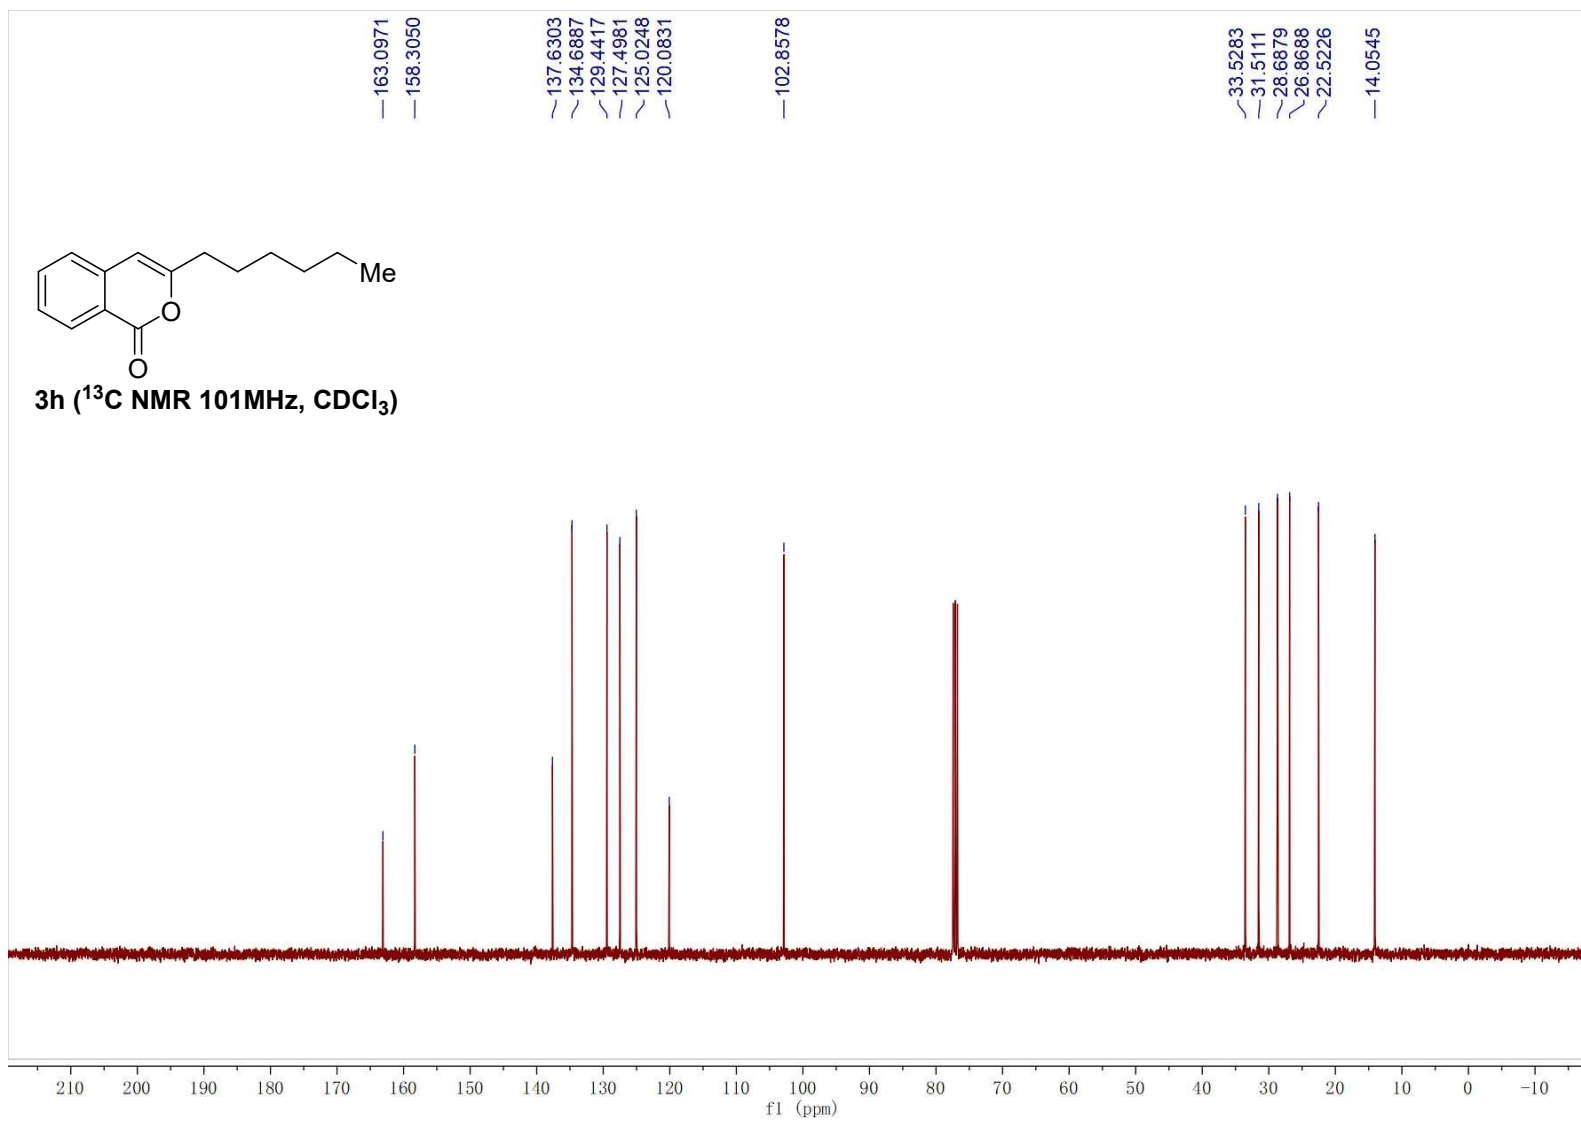

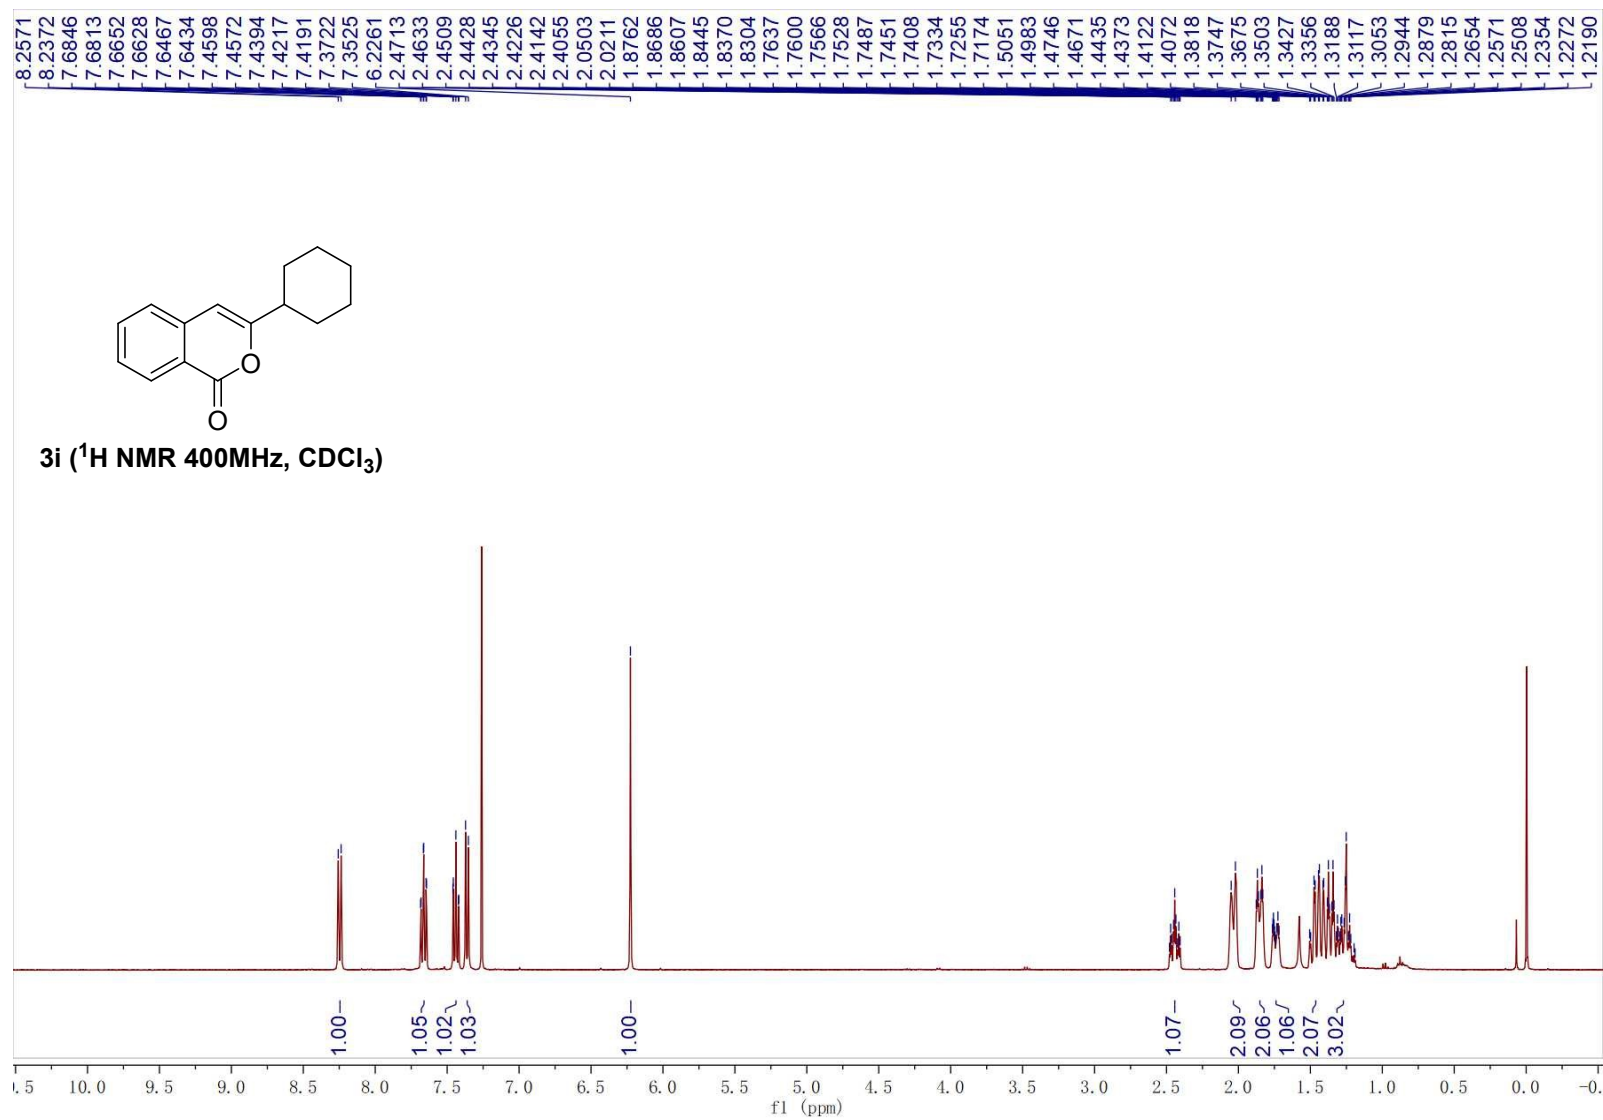

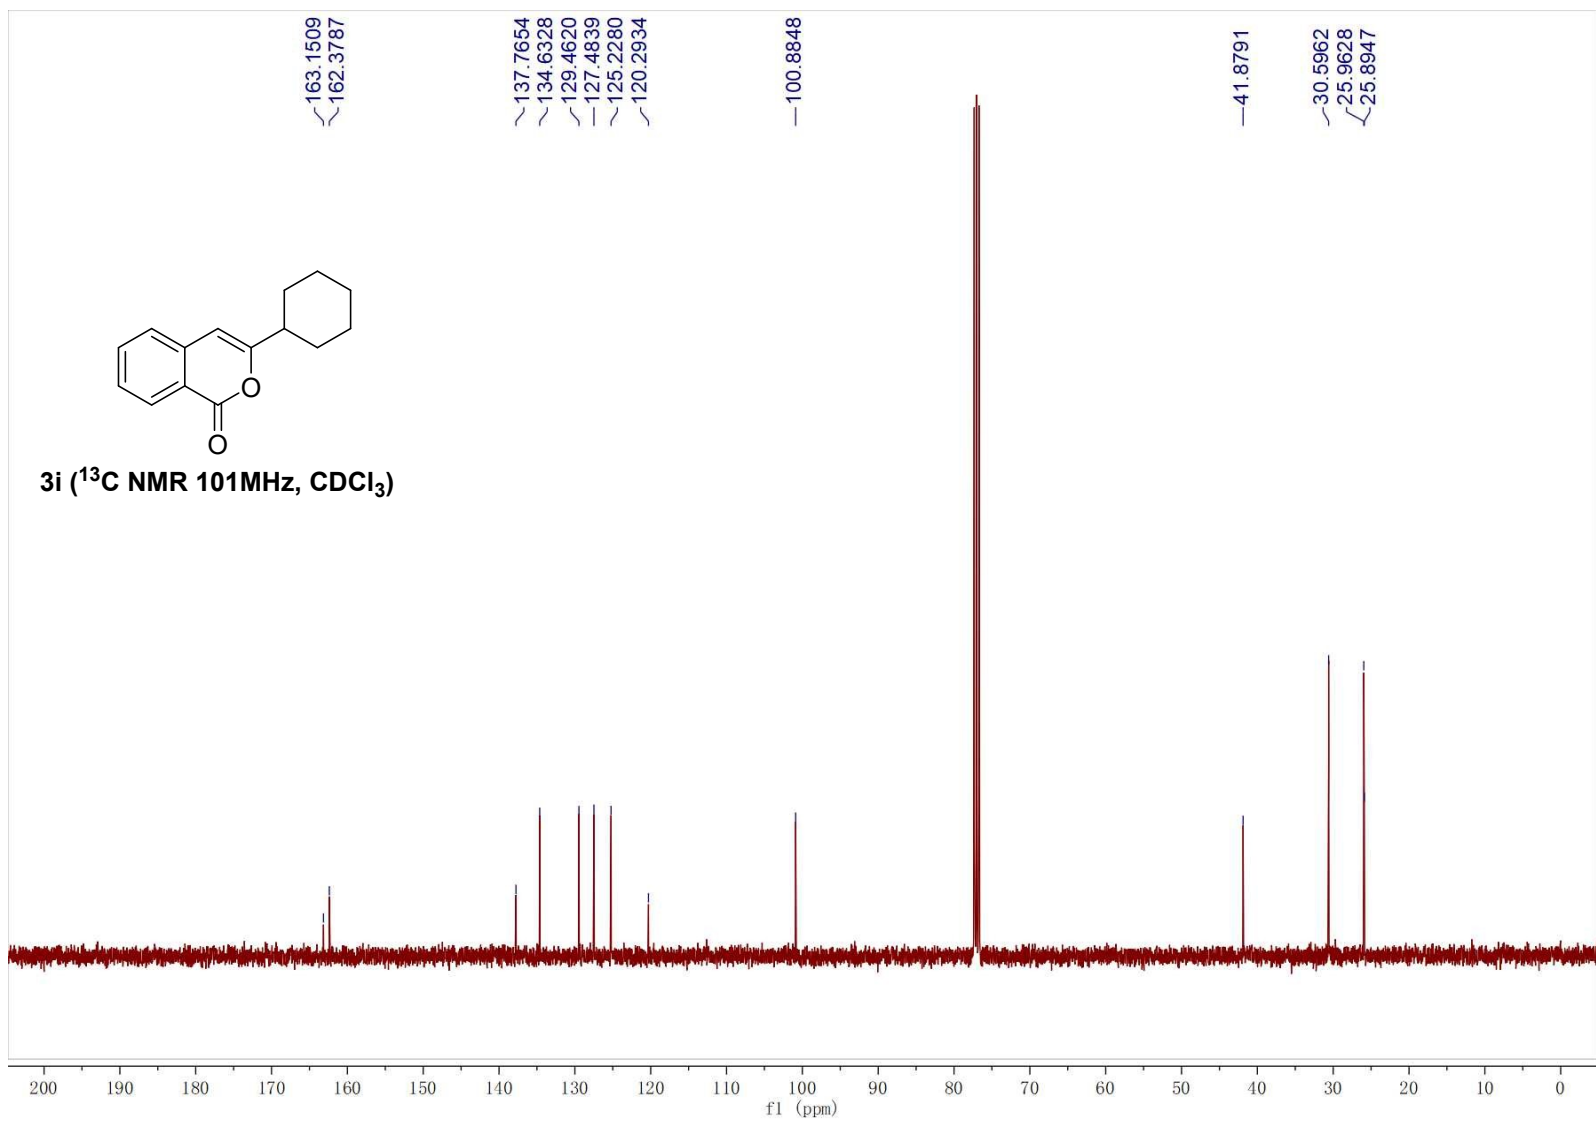

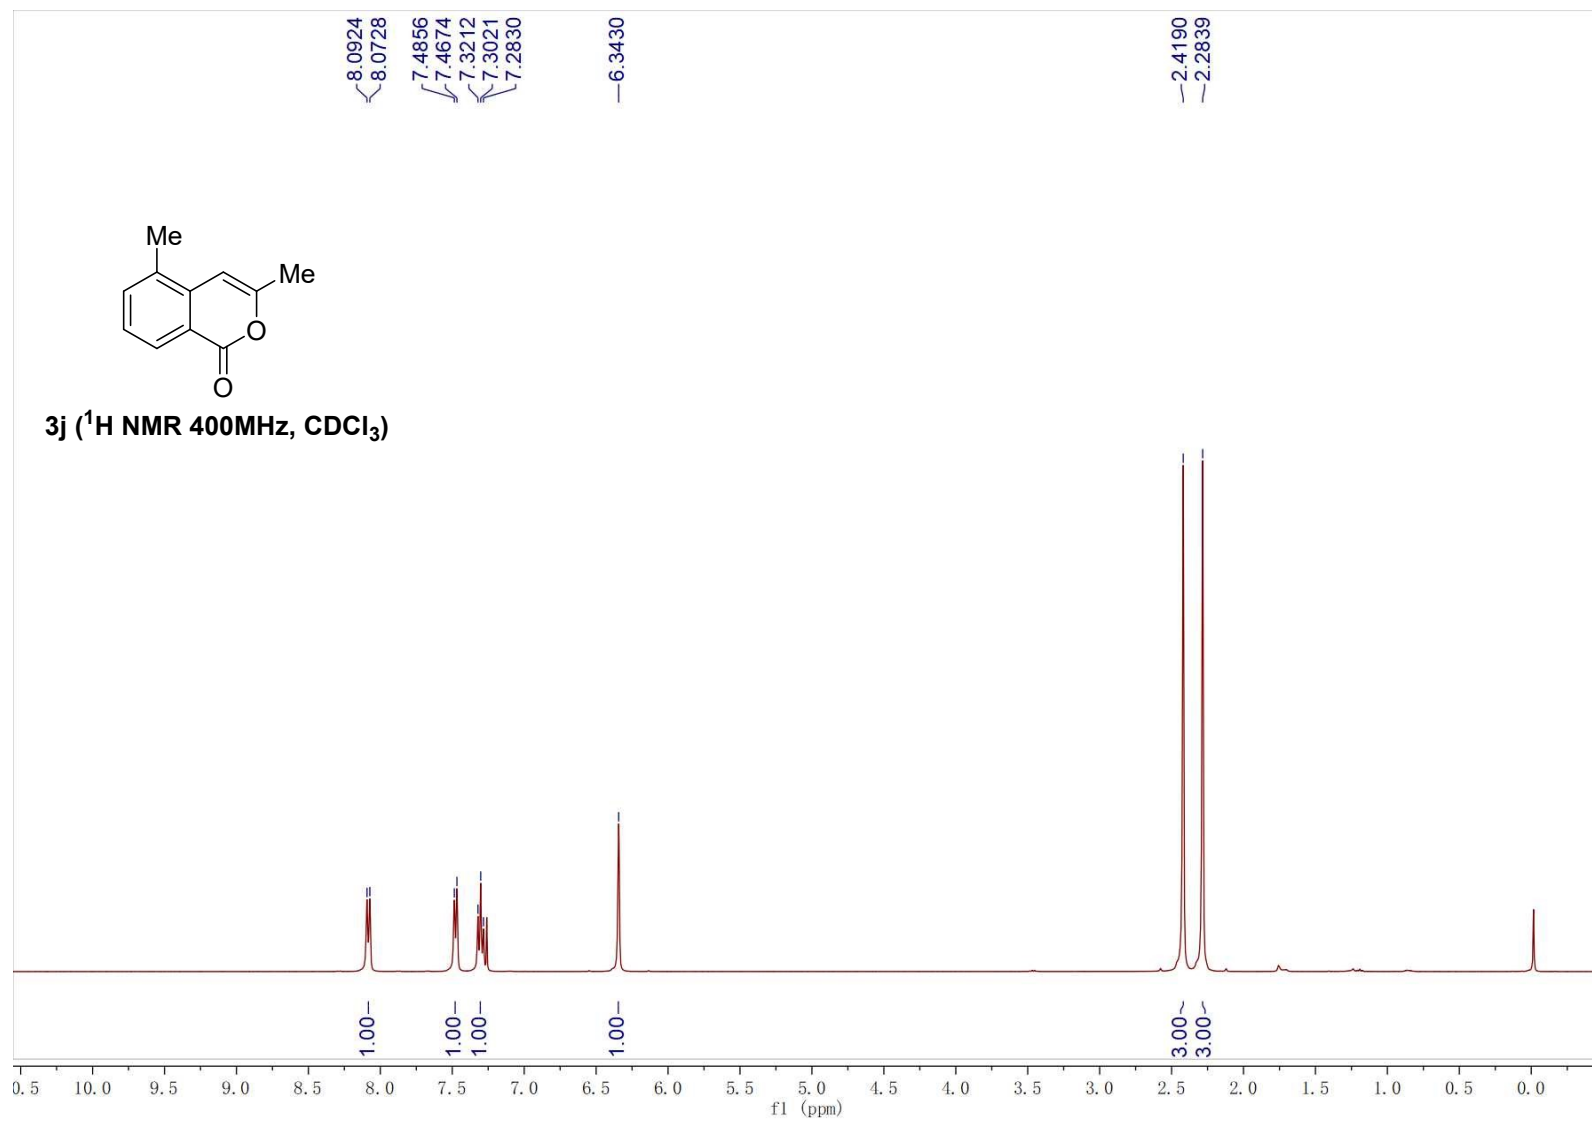

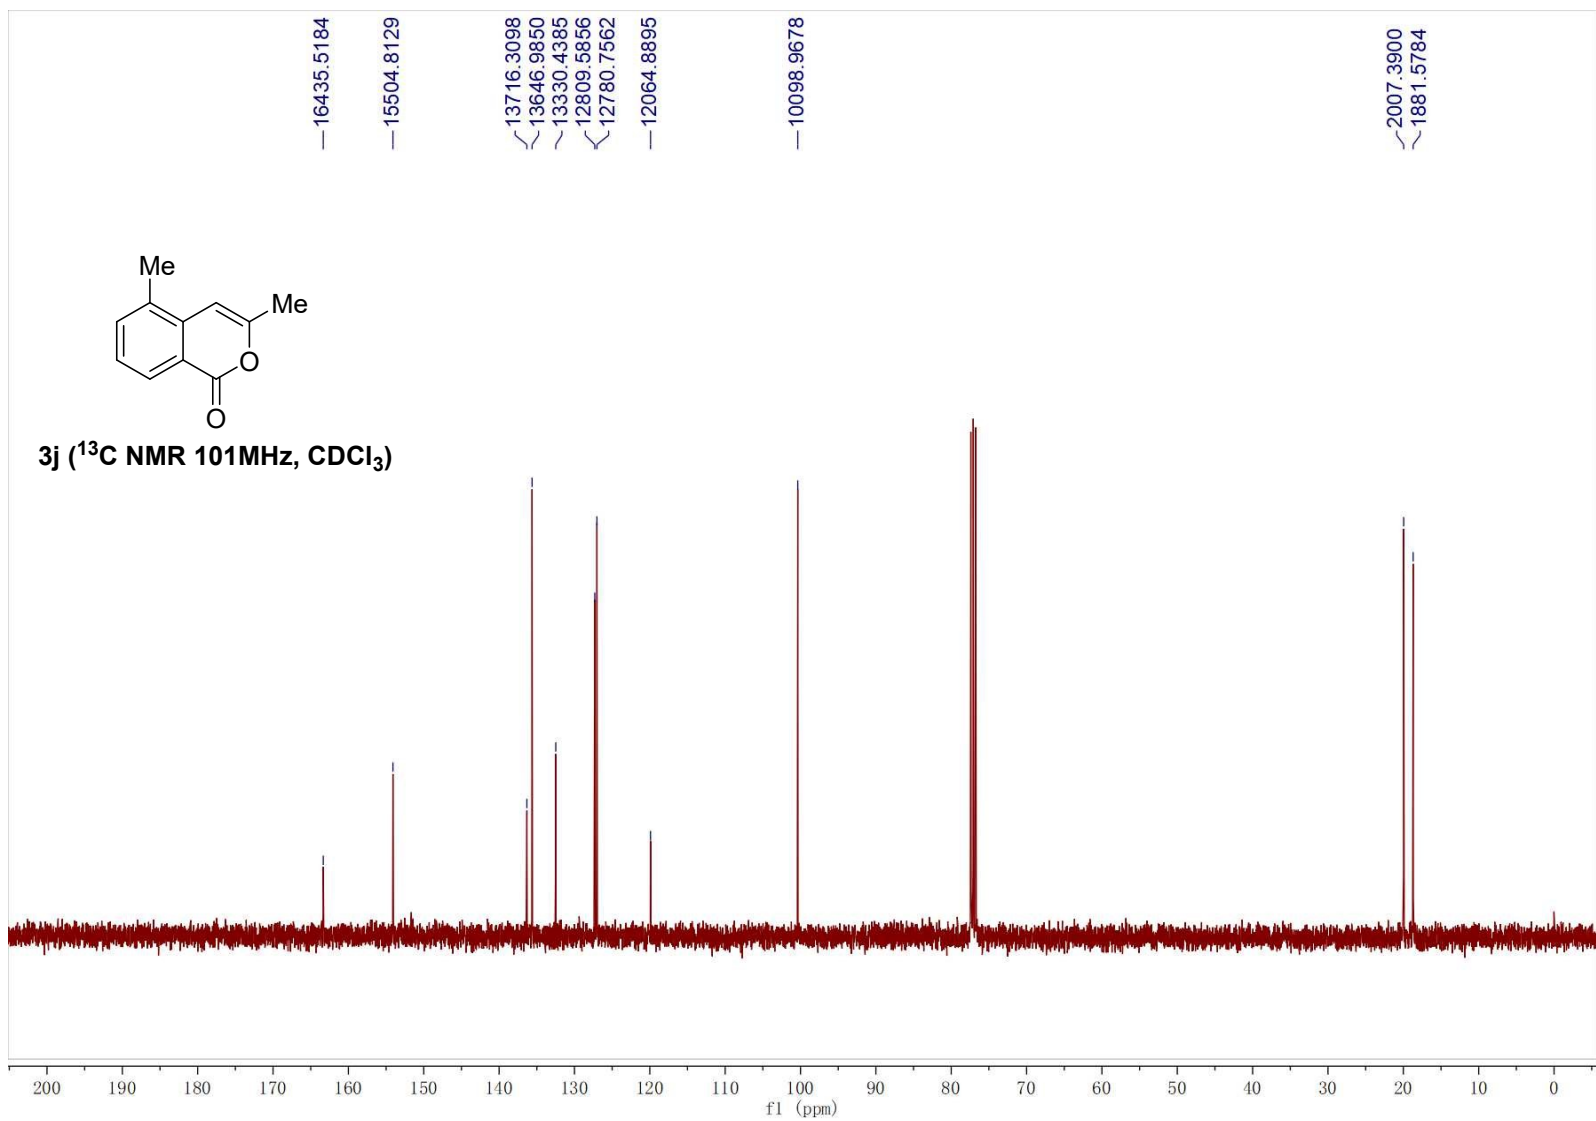

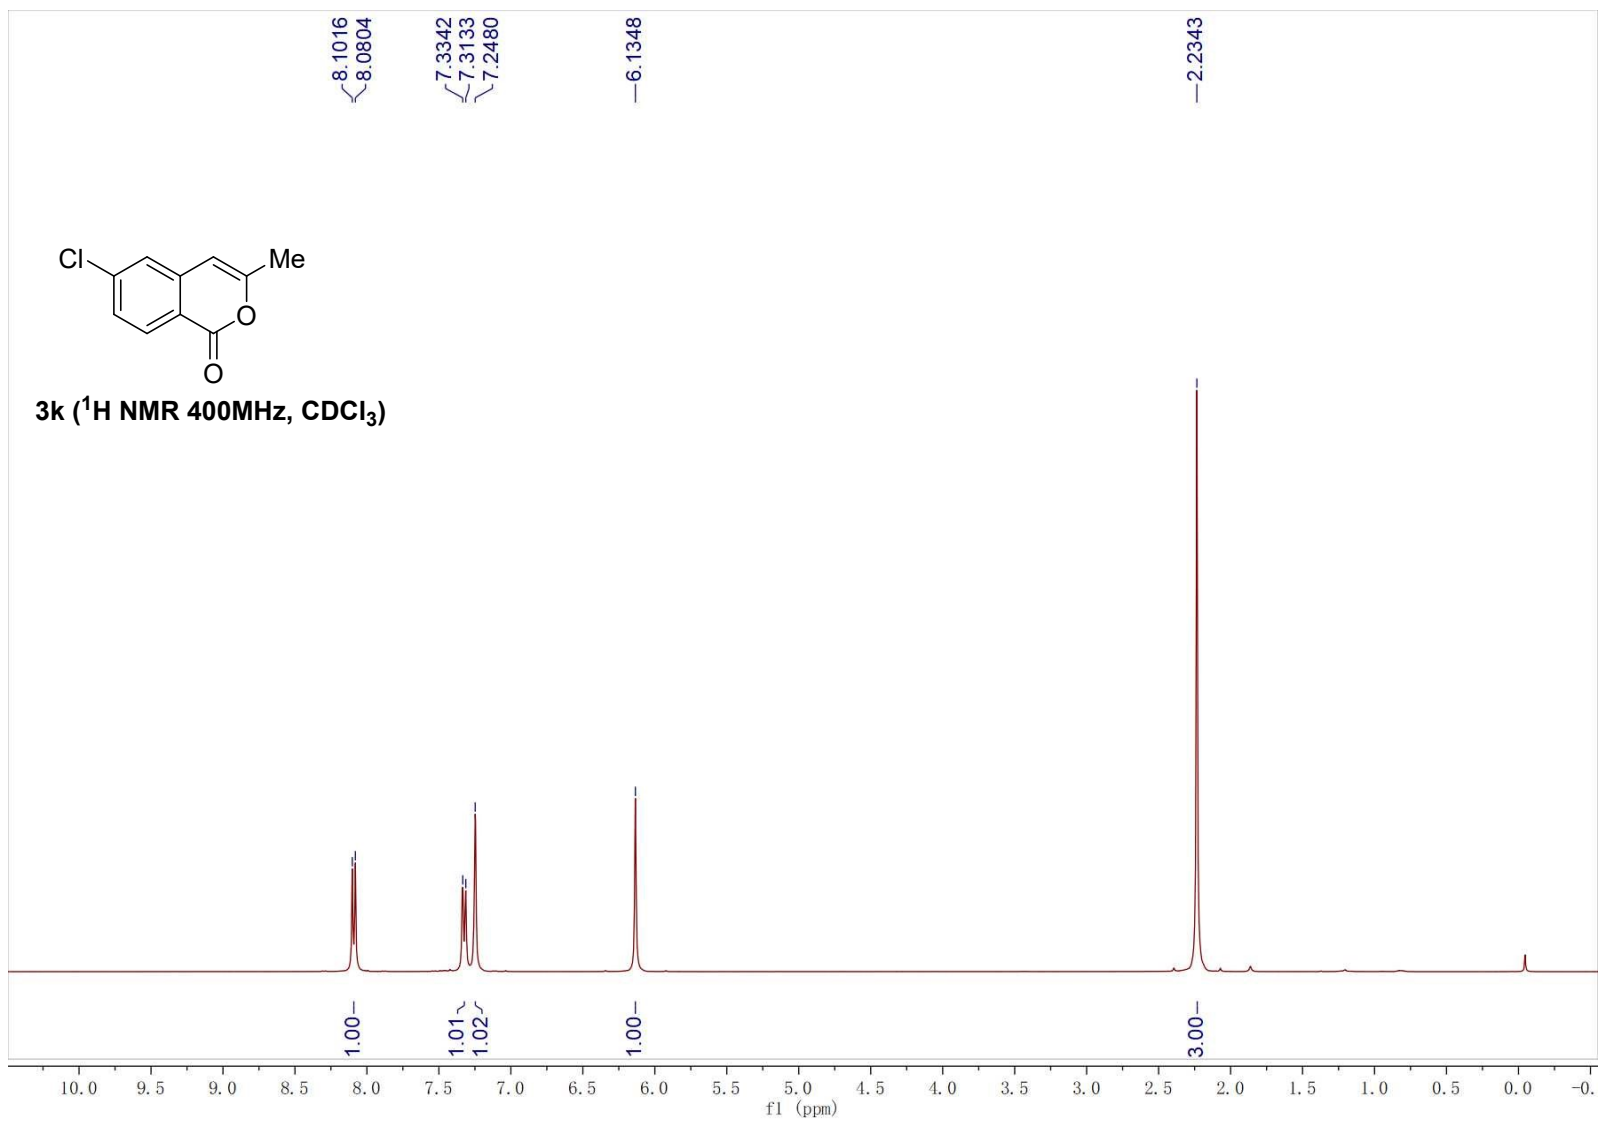

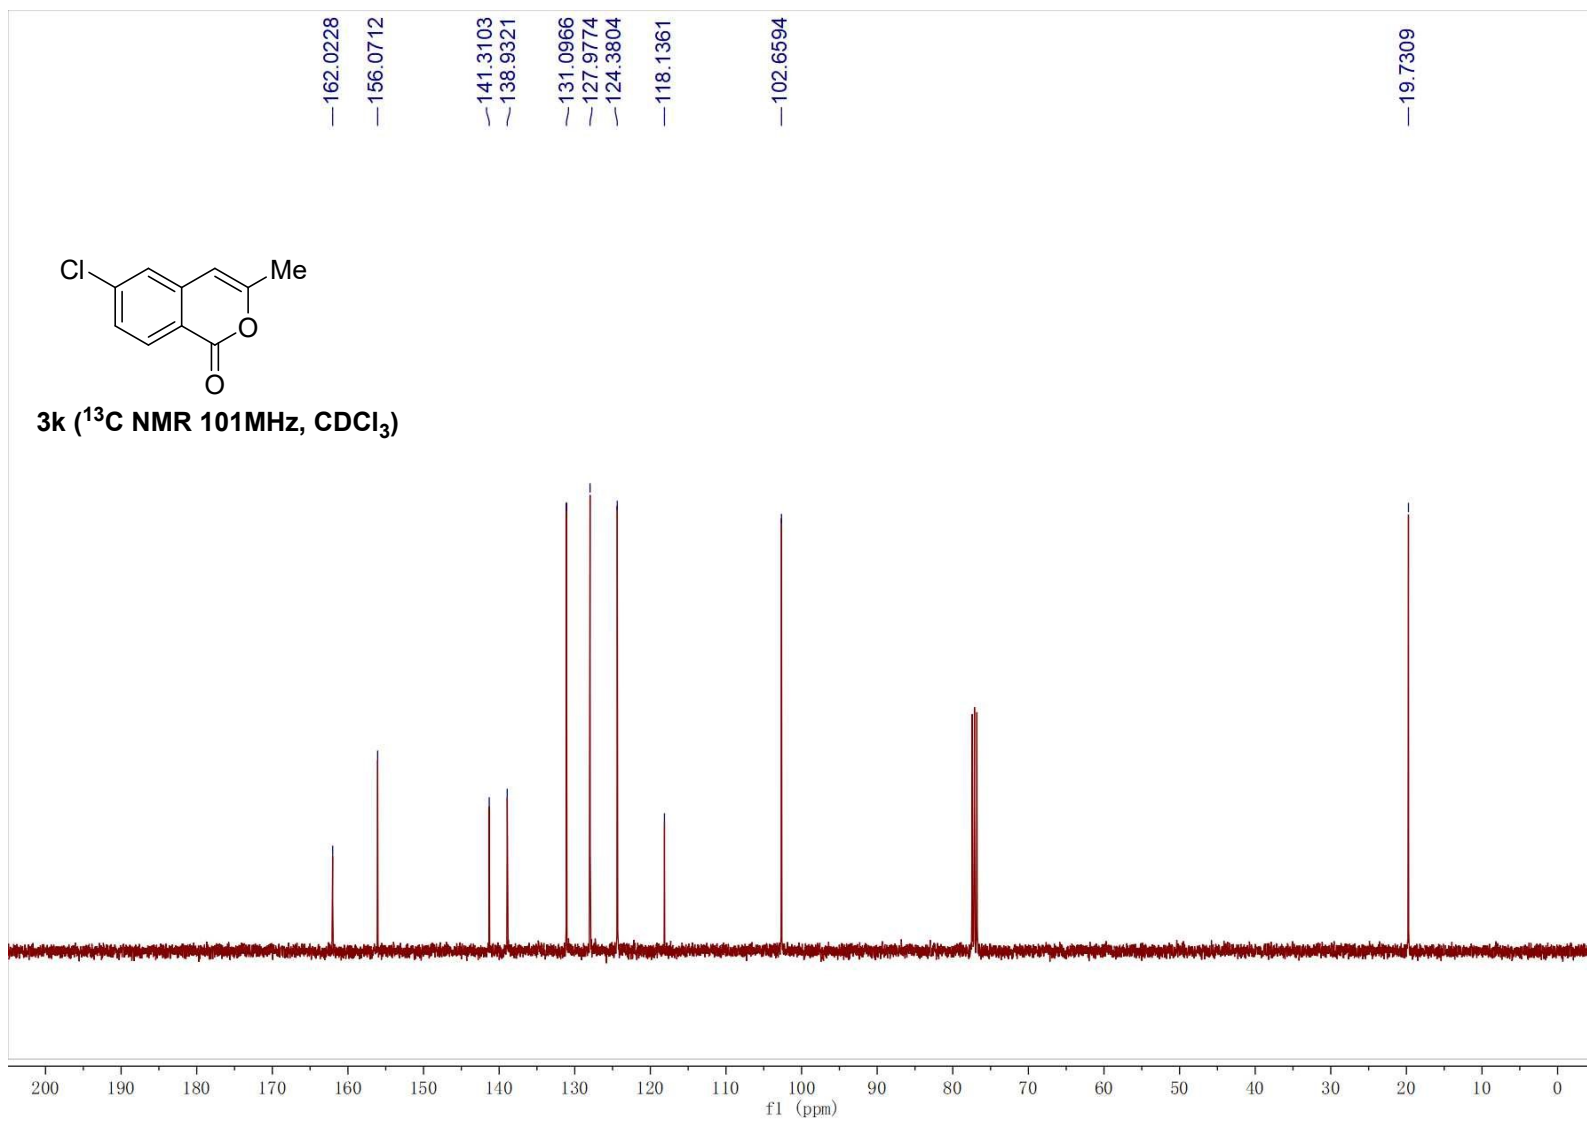



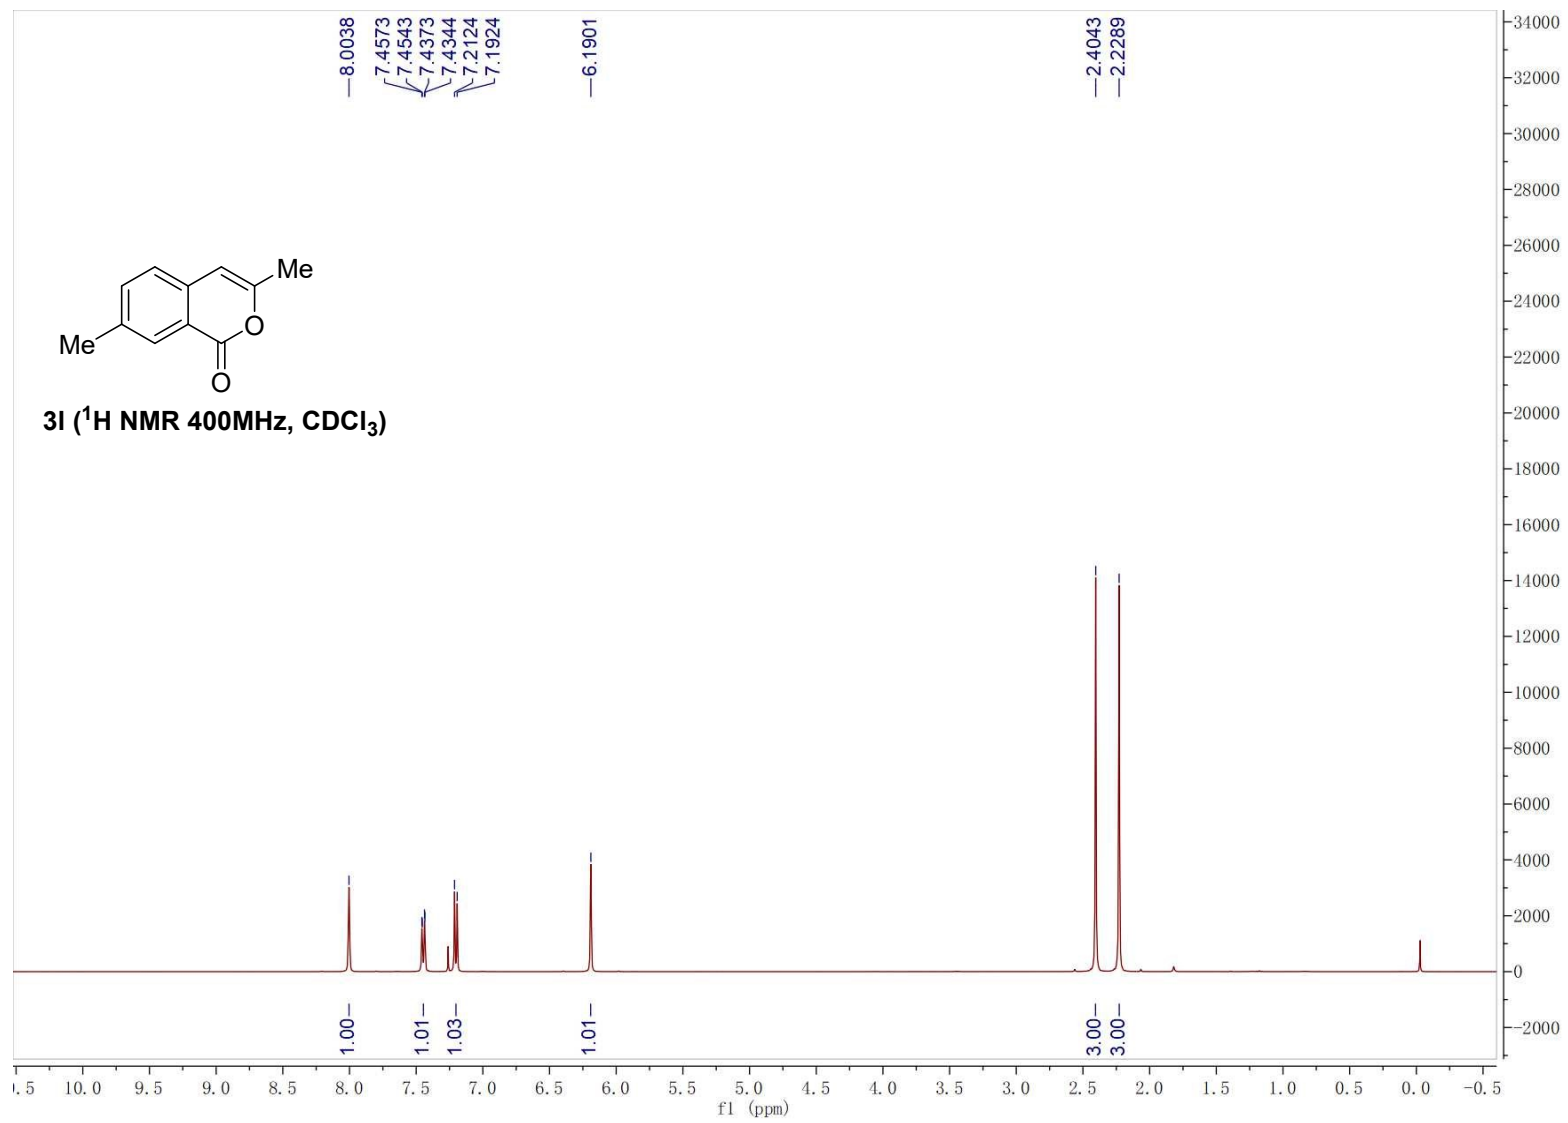

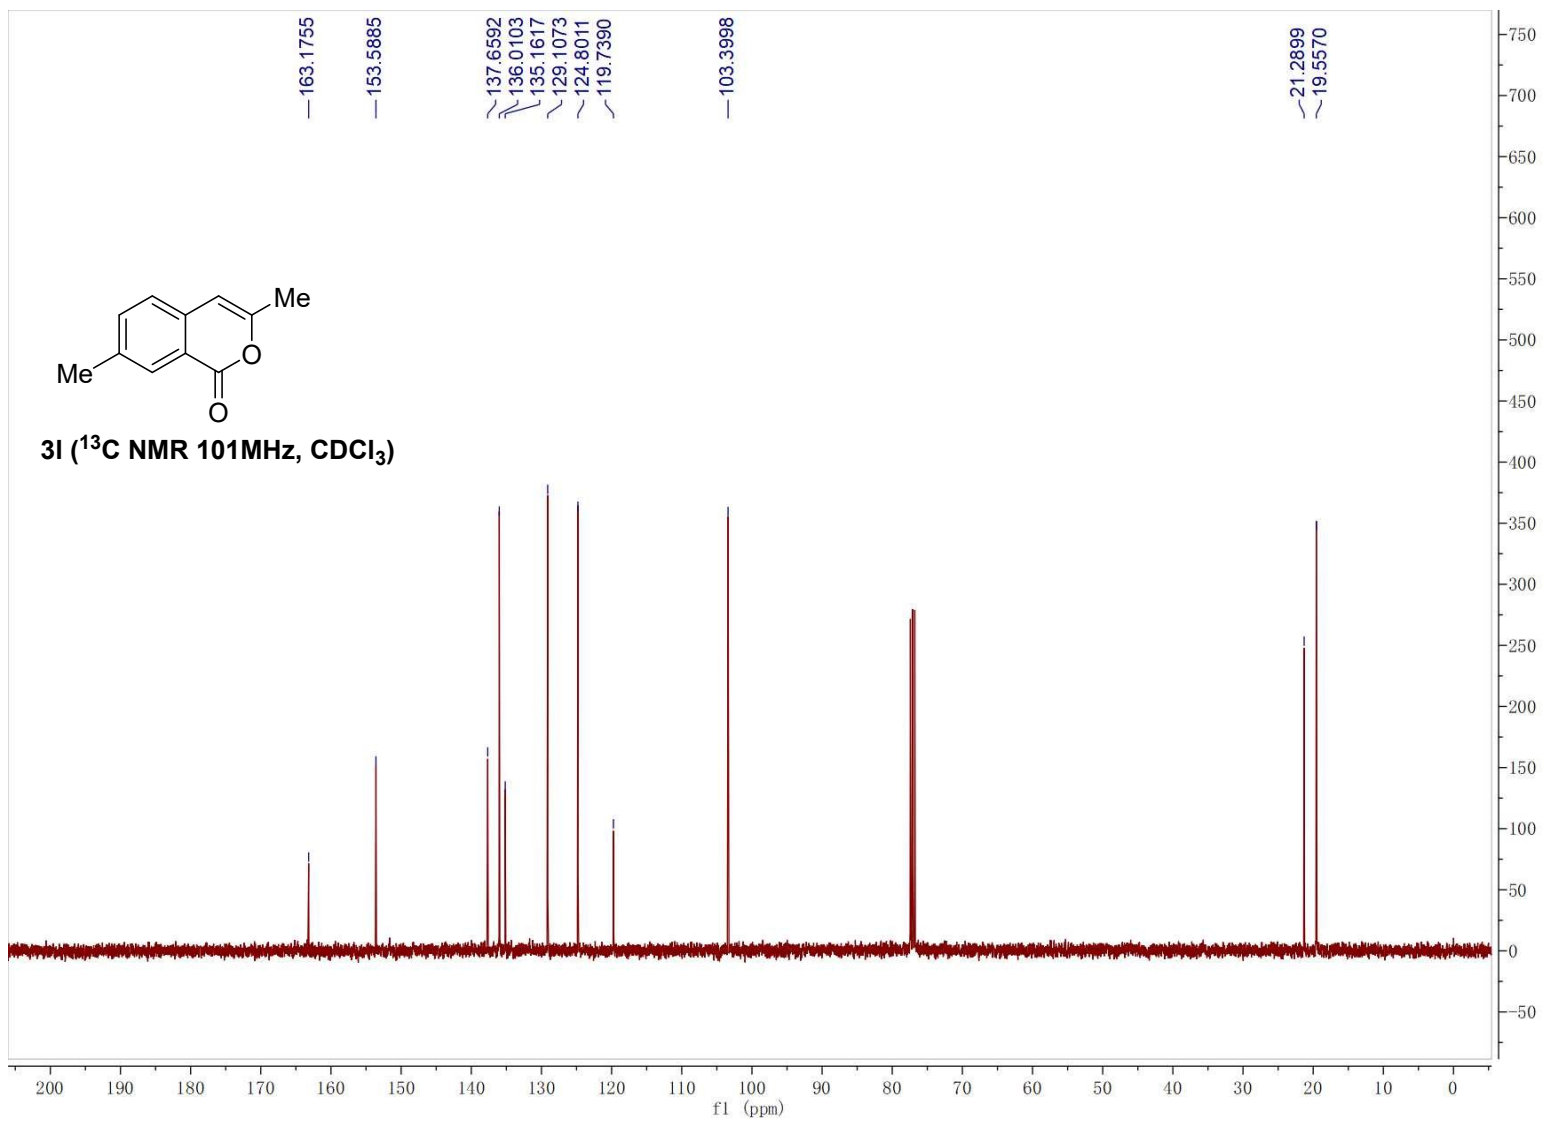

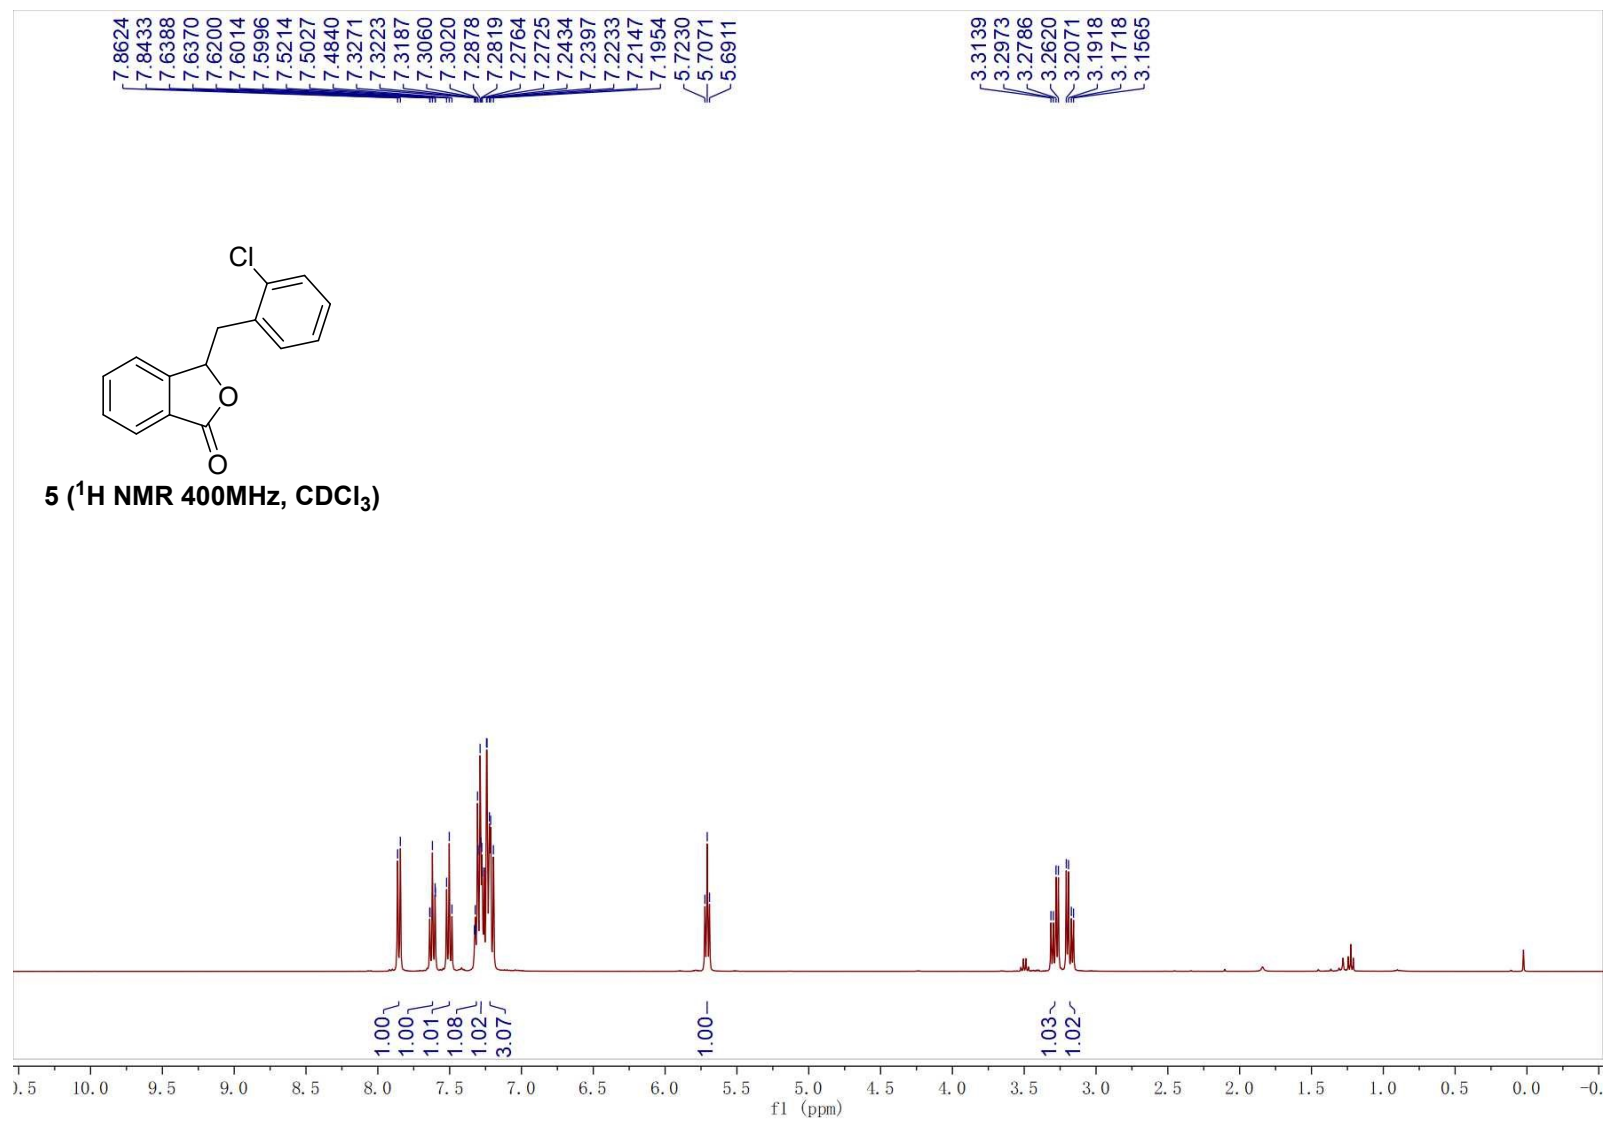

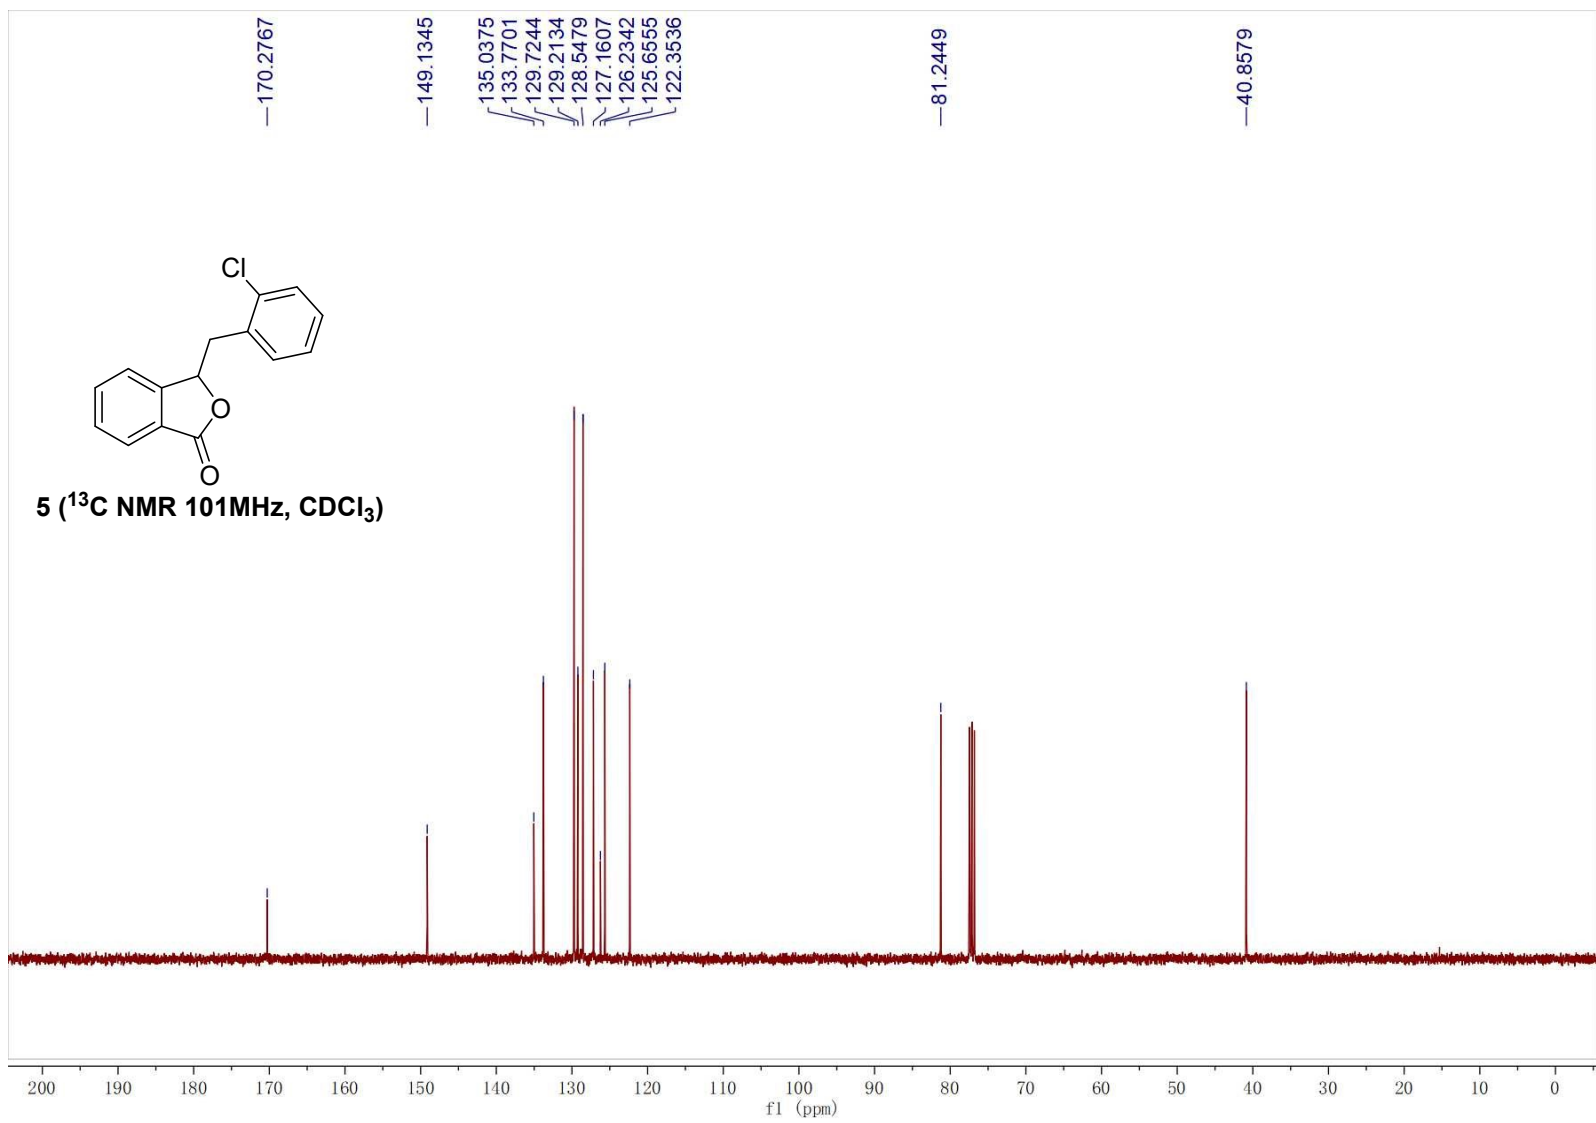

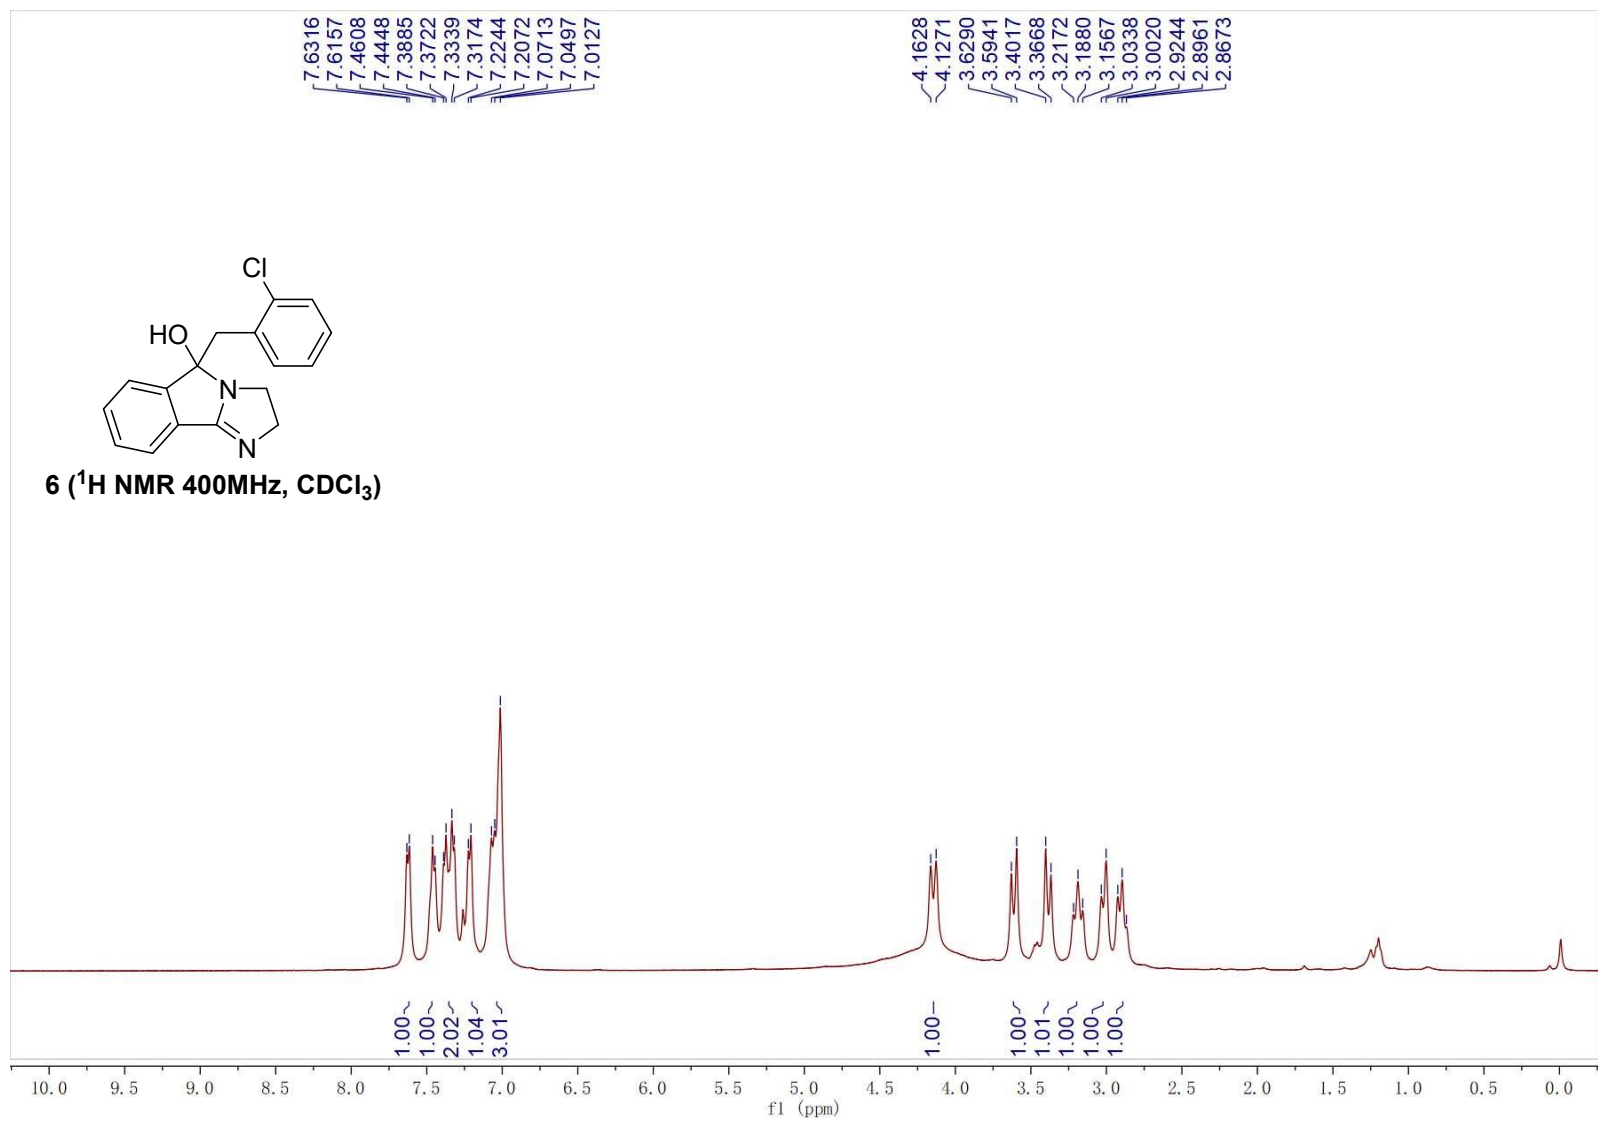

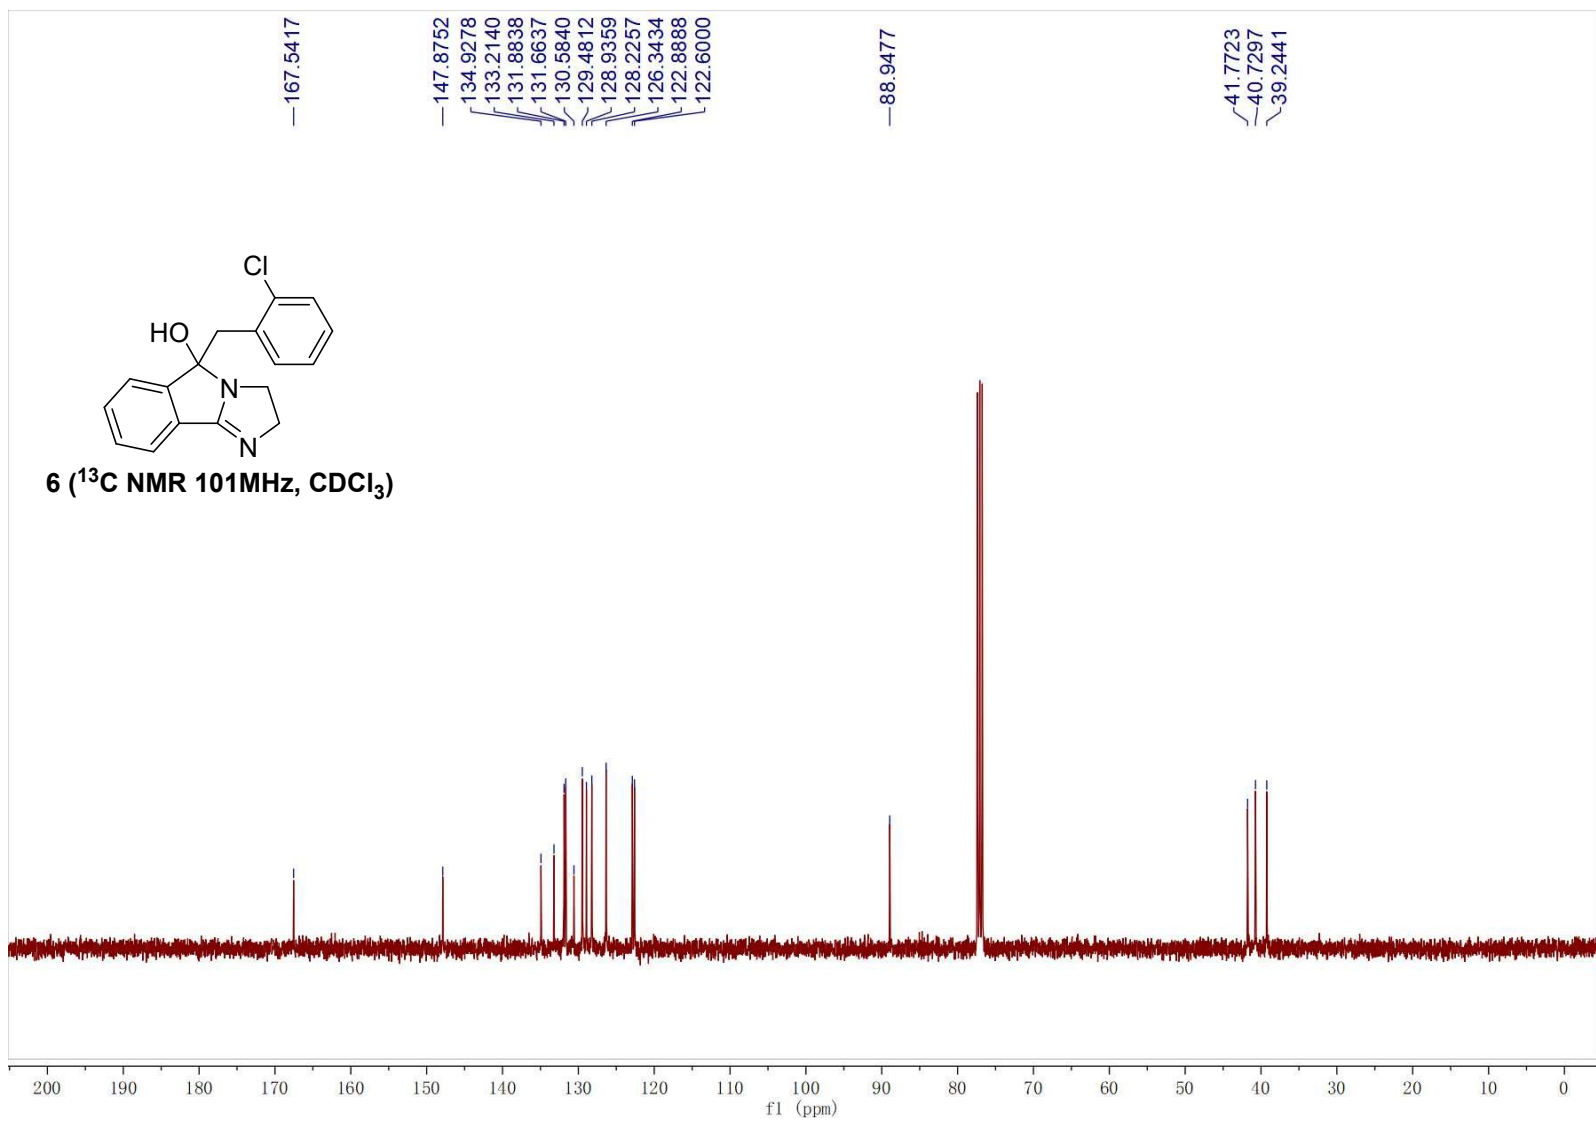

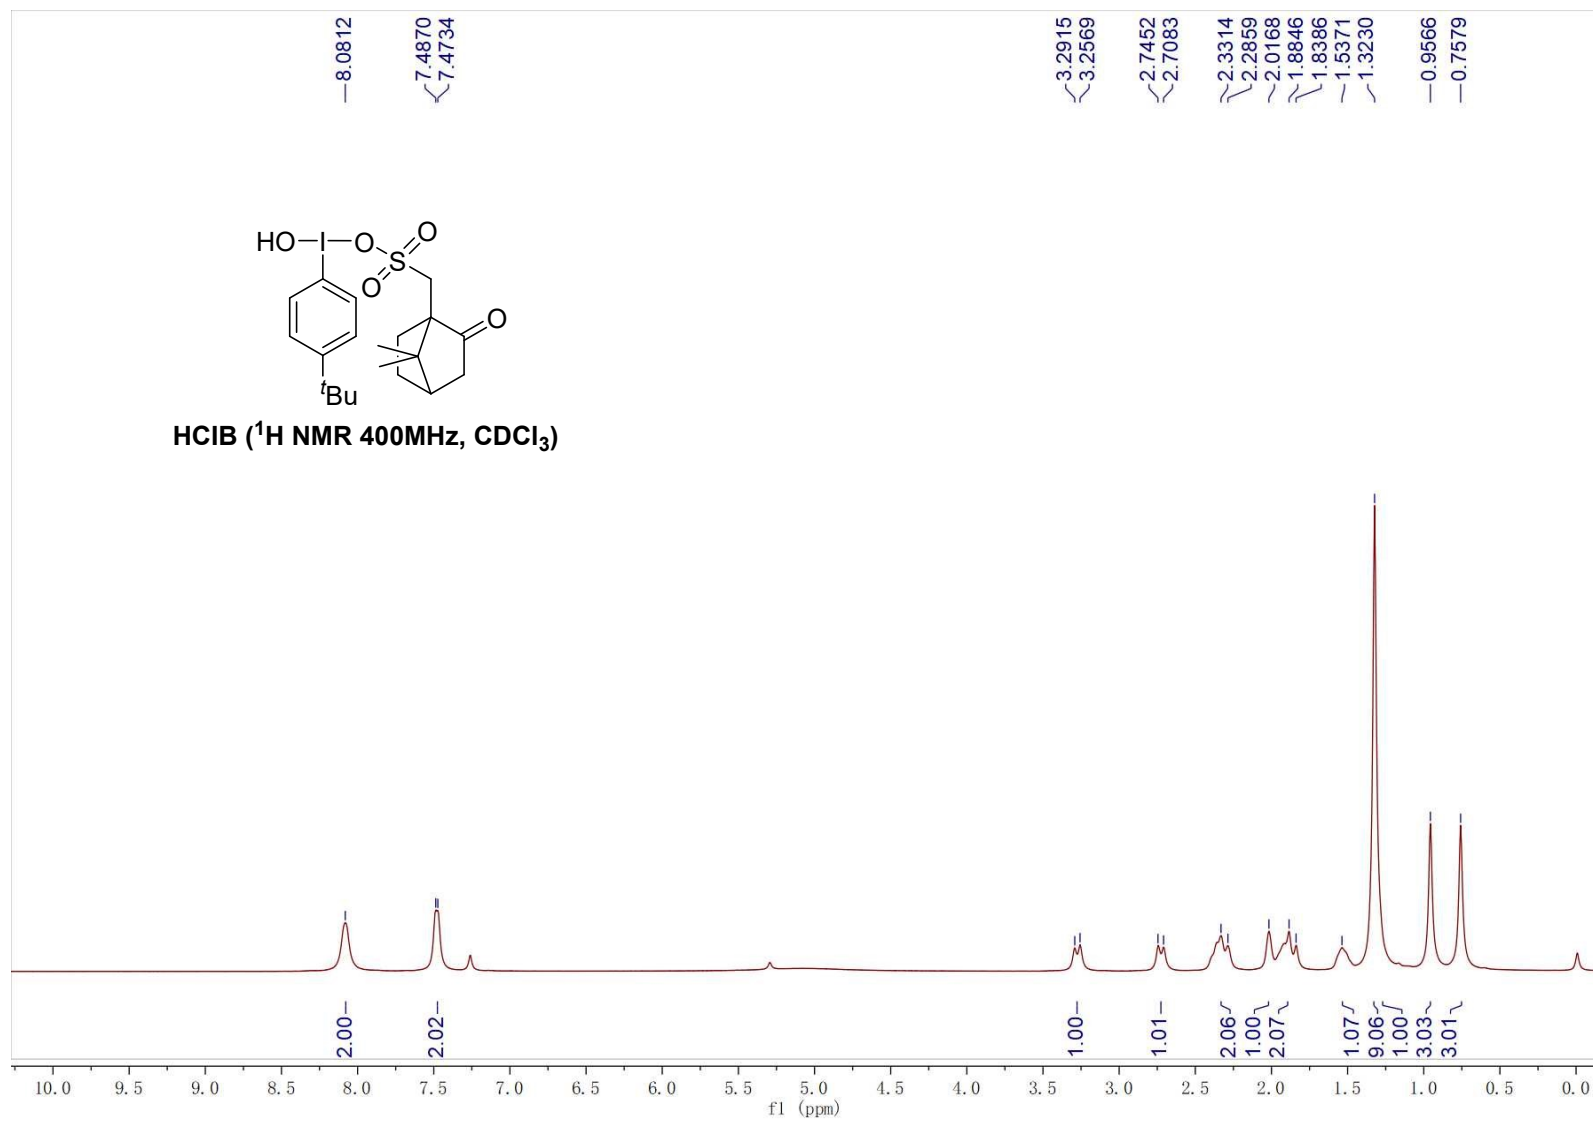

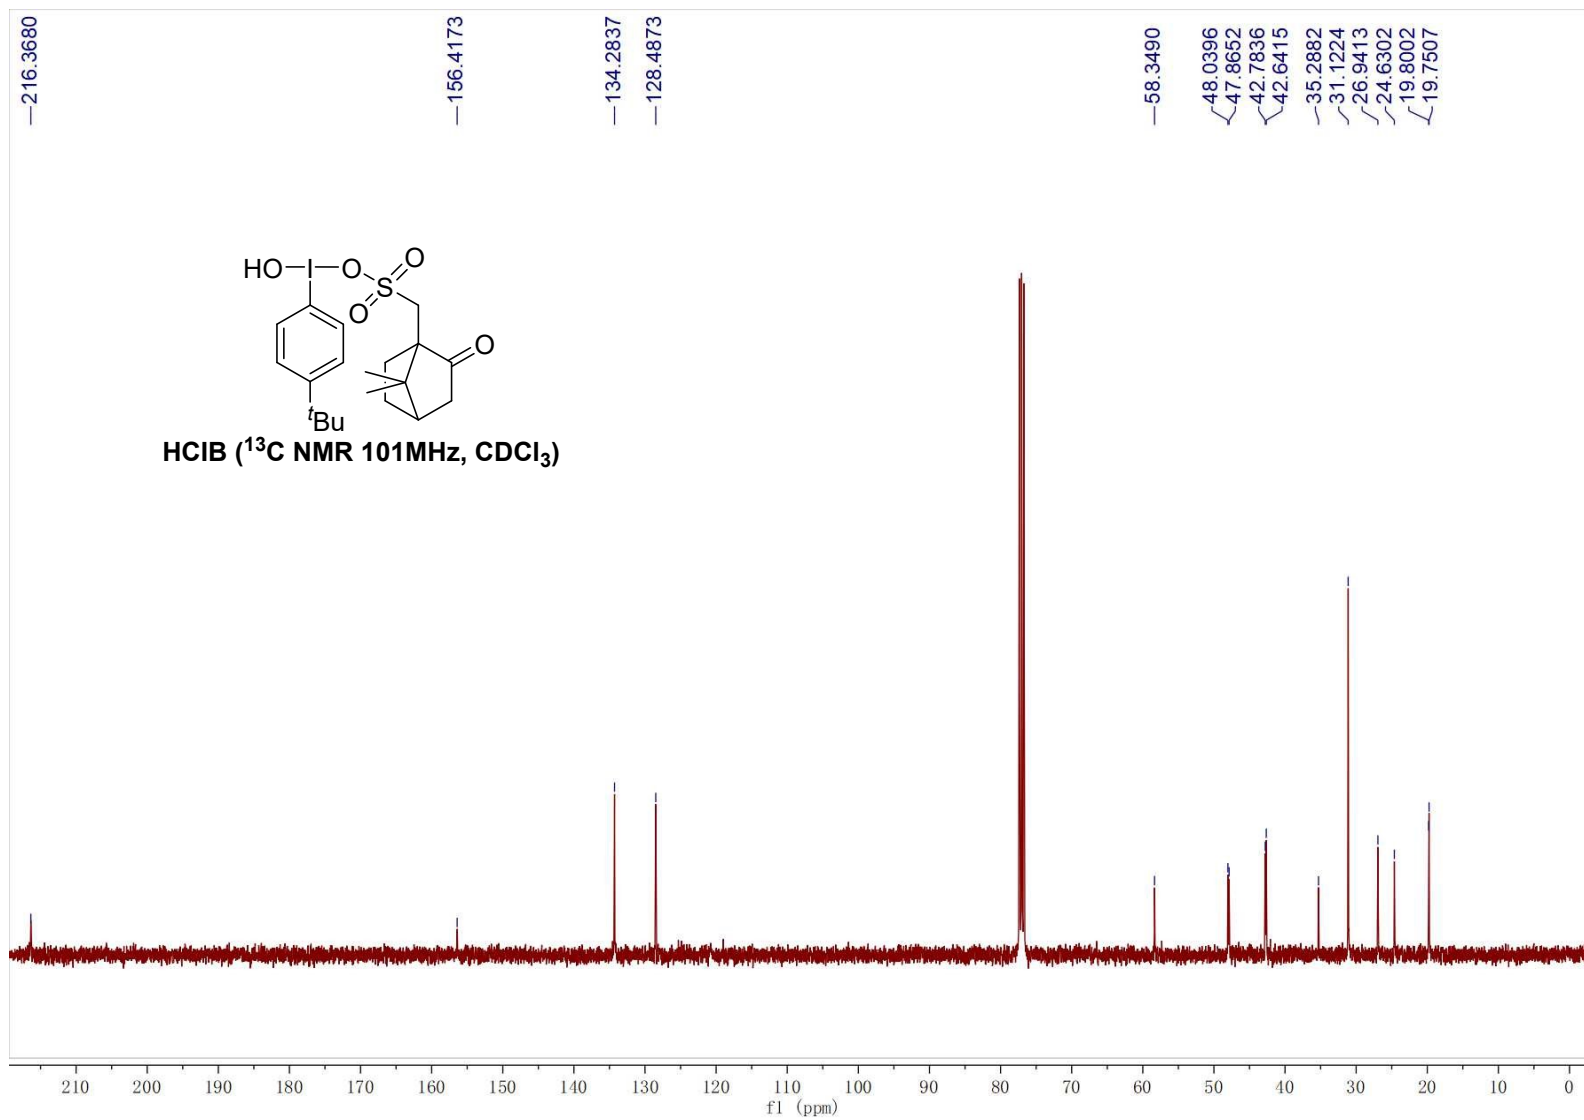



## V..X-ray Crystal Structure and Data of HCIB

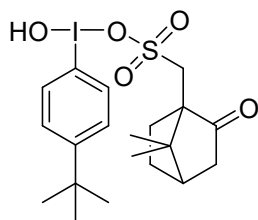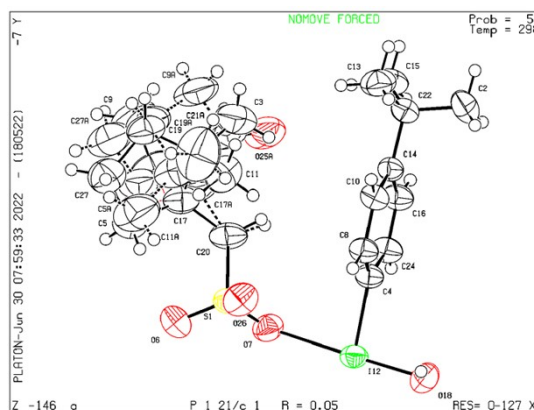

**Table 1 Crystal data and structure refinement for HCIB**

|                                    |                                                               |
|------------------------------------|---------------------------------------------------------------|
| Identification code                | HCIB                                                          |
| Empirical formula                  | C <sub>20</sub> H <sub>29</sub> IO <sub>5</sub> S             |
| Formula weight                     | 508.39                                                        |
| Temperature/K                      | 298                                                           |
| Crystal system                     | monoclinic                                                    |
| Space group                        | P2 <sub>1</sub> /c                                            |
| a/Å                                | 14.715(3)                                                     |
| b/Å                                | 7.0850(14)                                                    |
| c/Å                                | 21.523(4)                                                     |
| α/°                                | 90                                                            |
| β/°                                | 107.03(3)                                                     |
| γ/°                                | 90                                                            |
| Volume/Å <sup>3</sup>              | 2145.5(8)                                                     |
| Z                                  | 4                                                             |
| ρ <sub>calc</sub> /cm <sup>3</sup> | 1.574                                                         |
| μ/mm <sup>-1</sup>                 | 1.617                                                         |
| F(000)                             | 1032.0                                                        |
| Crystal size/mm <sup>3</sup>       | 0.15 × 0.12 × 0.05                                            |
| Radiation                          | MoKα (λ = 0.71073)                                            |
| 2θ range for data collection/°     | 6.082 to 52.742                                               |
| Index ranges                       | -18 ≤ h ≤ 15, -8 ≤ k ≤ 8, -26 ≤ l ≤ 26                        |
| Reflections collected              | 17283                                                         |
| Independent reflections            | 4317 [R <sub>int</sub> = 0.0720, R <sub>sigma</sub> = 0.0661] |
| Data/restraints/parameters         | 4317/362/346                                                  |
| Goodness-of-fit on F <sup>2</sup>  | 1.063                                                         |
| Final R indexes [I ≥ 2σ (I)]       | R <sub>1</sub> = 0.0512, wR <sub>2</sub> = 0.1277             |

Final R indexes [all data]  $R_1 = 0.0680$ ,  $wR_2 = 0.1382$

Largest diff. peak/hole /  $e \text{ \AA}^{-3}$  1.54/-0.85

**Table 2 Fractional Atomic Coordinates ( $\times 10^4$ ) and Equivalent Isotropic Displacement Parameters ( $\text{\AA}^2 \times 10^3$ ) for A.  $U_{\text{eq}}$  is defined as 1/3 of the trace of the orthogonalised  $U_{ij}$  tensor**

| Atom | x          | y          | z         | U(eq)     |
|------|------------|------------|-----------|-----------|
| I12  | 4562.0(3)  | 4004.7(5)  | 3228.8(2) | 46.28(16) |
| S1   | 6739.1(11) | 3900.9(19) | 2859.6(7) | 47.7(3)   |
| O18  | 3372(3)    | 4808(7)    | 3366(2)   | 59.5(10)  |
| O7   | 6083(3)    | 2851(6)    | 3142(2)   | 59.6(10)  |
| O26  | 6325(3)    | 5612(6)    | 2552(2)   | 67.5(12)  |
| C4   | 5391(4)    | 5917(7)    | 3894(3)   | 43.7(11)  |
| O6   | 7113(4)    | 2695(7)    | 2454(2)   | 79.8(13)  |
| C8   | 5551(4)    | 7716(7)    | 3710(2)   | 46.1(12)  |
| C10  | 6106(4)    | 8926(7)    | 4172(3)   | 45.5(12)  |
| C24  | 5757(4)    | 5340(8)    | 4529(3)   | 50.7(13)  |
| C14  | 6510(4)    | 8372(8)    | 4811(2)   | 43.2(10)  |
| C16  | 6303(4)    | 6555(8)    | 4984(3)   | 51.1(13)  |
| C22  | 7097(4)    | 9731(9)    | 5334(3)   | 52.1(11)  |
| C13  | 7530(6)    | 11327(10)  | 5043(4)   | 72.9(18)  |
| C20  | 7700(5)    | 4473(10)   | 3548(3)   | 65.6(14)  |
| C15  | 7908(6)    | 8684(11)   | 5820(4)   | 80(2)     |
| C2   | 6420(6)    | 10589(10)  | 5686(4)   | 77.9(19)  |
| C19  | 9735(8)    | 7407(18)   | 3422(7)   | 78(2)     |
| C21  | 9564(11)   | 4280(20)   | 3802(9)   | 103(4)    |
| C17  | 8601(7)    | 5304(14)   | 3379(6)   | 65.4(19)  |
| C11  | 8054(10)   | 8471(17)   | 3263(8)   | 87(3)     |
| C5   | 8739(12)   | 5210(20)   | 2662(6)   | 81(3)     |
| C23  | 8853(8)    | 7252(15)   | 3601(6)   | 72(2)     |
| C3   | 8983(13)   | 7650(30)   | 4281(7)   | 112(4)    |
| O25  | 9596(8)    | 2779(16)   | 4048(8)   | 163(5)    |
| C9   | 10329(11)  | 5720(20)   | 3895(10)  | 108(4)    |
| C27  | 9494(12)   | 6630(20)   | 2697(7)   | 100(4)    |
| C3A  | 8520(20)   | 9070(30)   | 3143(15)  | 143(7)    |
| C11A | 8640(20)   | 6370(40)   | 2558(10)  | 130(8)    |
| C17A | 8612(13)   | 5600(30)   | 3595(8)   | 93(3)     |

**Table 2 Fractional Atomic Coordinates ( $\times 10^4$ ) and Equivalent Isotropic Displacement Parameters ( $\text{\AA}^2 \times 10^3$ ) for A.  $U_{\text{eq}}$  is defined as 1/3 of the trace of the orthogonalised  $U_{\text{IJ}}$  tensor**

| Atom | $x$       | $y$      | $z$      | $U(\text{eq})$ |
|------|-----------|----------|----------|----------------|
| O25A | 8771(12)  | 6000(20) | 4787(7)  | 105(6)         |
| C21A | 9027(14)  | 6360(30) | 4328(8)  | 84(5)          |
| C9A  | 9838(16)  | 7590(40) | 4302(9)  | 108(6)         |
| C19A | 9834(14)  | 7390(30) | 3542(11) | 111(5)         |
| C5A  | 9496(15)  | 4170(30) | 3515(12) | 98(4)          |
| C27A | 10293(16) | 5380(40) | 3504(14) | 117(6)         |
| C23A | 8800(14)  | 7130(30) | 3244(10) | 106(4)         |

**Table 3 Anisotropic Displacement Parameters ( $\text{\AA}^2 \times 10^3$ ) for A. The Anisotropic displacement factor exponent takes the form:  $-2\pi^2[\text{h}^2\text{a}^*2U_{11}+2\text{hka}^*\text{b}^*U_{12}+\dots]$**

| Atom | $U_{11}$ | $U_{22}$ | $U_{33}$ | $U_{23}$  | $U_{13}$ | $U_{12}$  |
|------|----------|----------|----------|-----------|----------|-----------|
| I12  | 44.5(3)  | 51.2(2)  | 39.5(2)  | -2.42(15) | 6.45(16) | -8.02(15) |
| S1   | 44.8(9)  | 48.9(8)  | 44.5(8)  | -1.7(6)   | 5.4(6)   | -0.5(6)   |
| O18  | 47(2)    | 75(3)    | 57(3)    | 9(2)      | 15.1(19) | -2(2)     |
| O7   | 52(2)    | 51(2)    | 75(3)    | -4.4(18)  | 15.9(19) | -5.6(18)  |
| O26  | 58(3)    | 72(2)    | 63(3)    | 21(2)     | 3(2)     | 13(2)     |
| C4   | 45(3)    | 45(2)    | 35.8(19) | 2.1(16)   | 3.4(18)  | -1.2(18)  |
| O6   | 85(4)    | 79(3)    | 80(3)    | -27(2)    | 31(3)    | -3(2)     |
| C8   | 53(3)    | 46(2)    | 34(2)    | 5.3(16)   | 5.5(19)  | -1.8(19)  |
| C10  | 54(3)    | 39(2)    | 39.2(19) | 2.2(15)   | 8.0(18)  | 1.1(19)   |
| C24  | 62(4)    | 44(2)    | 38(2)    | 7.2(16)   | 4(2)     | -3(2)     |
| C14  | 42(3)    | 49(2)    | 36.6(18) | -1.7(15)  | 6.9(17)  | 0.5(18)   |
| C16  | 57(4)    | 54(2)    | 34(2)    | 6.1(17)   | 2(2)     | -2(2)     |
| C22  | 53(3)    | 60(3)    | 41(2)    | -10.1(18) | 9.9(17)  | -6.0(19)  |
| C13  | 69(5)    | 70(3)    | 76(4)    | -9(3)     | 16(3)    | -25(3)    |
| C20  | 65(3)    | 69(4)    | 47(3)    | 9(2)      | -8(2)    | -11(2)    |
| C15  | 68(4)    | 94(5)    | 56(4)    | -7(3)     | -13(3)   | -2(3)     |
| C2   | 90(5)    | 78(4)    | 74(4)    | -27(3)    | 39(4)    | -5(3)     |
| C19  | 65(4)    | 61(5)    | 98(6)    | -3(4)     | 9(4)     | -10(3)    |
| C21  | 69(4)    | 80(5)    | 135(8)   | 38(6)     | -11(6)   | 4(4)      |
| C17  | 61(3)    | 59(3)    | 63(4)    | 4(3)      | -2(3)    | -4(3)     |
| C11  | 78(6)    | 64(5)    | 118(8)   | 9(6)      | 27(6)    | 7(5)      |
| C5   | 77(7)    | 82(7)    | 80(4)    | -13(4)    | 19(4)    | -12(5)    |
| C23  | 70(5)    | 63(4)    | 75(4)    | -5(3)     | 7(4)     | -7(3)     |
| C3   | 108(10)  | 136(12)  | 83(5)    | -36(6)    | 14(5)    | -37(9)    |

**Table 3 Anisotropic Displacement Parameters ( $\text{\AA}^2 \times 10^3$ ) for A. The Anisotropic displacement factor exponent takes the form:  $-2\pi^2[h^2a^*^2U_{11}+2hka^*b^*U_{12}+\dots]$**

| Atom | $U_{11}$ | $U_{22}$ | $U_{33}$ | $U_{23}$ | $U_{13}$ | $U_{12}$ |
|------|----------|----------|----------|----------|----------|----------|
| O25  | 91(7)    | 105(6)   | 251(12)  | 92(7)    | -16(8)   | 0(5)     |
| C9   | 66(4)    | 95(7)    | 141(9)   | 25(7)    | -1(6)    | -2(4)    |
| C27  | 97(8)    | 109(8)   | 100(6)   | -11(5)   | 36(5)    | -29(7)   |
| C3A  | 161(17)  | 165(10)  | 117(15)  | 65(11)   | 64(15)   | 14(12)   |
| C11A | 108(18)  | 199(16)  | 74(6)    | 17(9)    | 13(8)    | -50(20)  |
| C17A | 80(5)    | 124(8)   | 63(6)    | 4(5)     | 4(5)     | -39(4)   |
| O25A | 78(10)   | 161(15)  | 64(6)    | 1(7)     | 2(6)     | -29(9)   |
| C21A | 52(8)    | 119(11)  | 65(5)    | 3(6)     | -7(5)    | -22(7)   |
| C9A  | 70(9)    | 148(13)  | 91(7)    | -3(8)    | -1(6)    | -45(9)   |
| C19A | 88(7)    | 143(10)  | 94(8)    | 8(8)     | 13(6)    | -47(7)   |
| C5A  | 78(6)    | 139(9)   | 66(12)   | -7(8)    | 4(9)     | -36(6)   |
| C27A | 85(6)    | 153(11)  | 104(15)  | 3(11)    | 14(10)   | -39(7)   |
| C23A | 88(7)    | 142(9)   | 78(6)    | 23(7)    | 6(6)     | -39(6)   |

**Table 4 Bond Lengths for HCIB**

| Atom | Atom | Length/ $\text{\AA}$ | Atom | Atom | Length/ $\text{\AA}$ |
|------|------|----------------------|------|------|----------------------|
| I12  | O18  | 1.945(4)             | C19  | C27  | 1.594(18)            |
| I12  | O7   | 2.441(4)             | C21  | C17  | 1.616(17)            |
| I12  | C4   | 2.087(5)             | C21  | O25  | 1.181(15)            |
| S1   | O7   | 1.482(4)             | C21  | C9   | 1.489(18)            |
| S1   | O26  | 1.430(4)             | C17  | C5   | 1.614(17)            |
| S1   | O6   | 1.441(5)             | C17  | C23  | 1.472(13)            |
| S1   | C20  | 1.770(6)             | C11  | C23  | 1.468(17)            |
| C4   | C8   | 1.375(7)             | C5   | C27  | 1.481(19)            |
| C4   | C24  | 1.376(7)             | C23  | C3   | 1.447(17)            |
| C8   | C10  | 1.384(7)             | C3A  | C23A | 1.43(2)              |
| C10  | C14  | 1.386(7)             | C11A | C23A | 1.52(2)              |
| C24  | C16  | 1.372(8)             | C17A | C21A | 1.61(2)              |
| C14  | C16  | 1.398(8)             | C17A | C5A  | 1.70(2)              |
| C14  | C22  | 1.540(8)             | C17A | C23A | 1.390(17)            |
| C22  | C13  | 1.521(9)             | O25A | C21A | 1.183(18)            |
| C22  | C15  | 1.529(9)             | C21A | C9A  | 1.49(2)              |
| C22  | C2   | 1.541(9)             | C9A  | C19A | 1.64(2)              |
| C20  | C17  | 1.588(12)            | C19A | C27A | 1.59(2)              |
| C20  | C17A | 1.540(15)            | C19A | C23A | 1.481(19)            |
| C19  | C23  | 1.462(15)            | C5A  | C27A | 1.46(2)              |

**Table 4 Bond Lengths for HCIB**

| Atom | Atom | Length/Å  | Atom | Atom | Length/Å |
|------|------|-----------|------|------|----------|
| C19  | C9   | 1.645(17) |      |      |          |

**Table 5 Bond Angles for HCIB**

| Atom | Atom | Atom | Angle/°    | Atom | Atom | Atom | Angle/°   |
|------|------|------|------------|------|------|------|-----------|
| O18  | I12  | O7   | 175.20(16) | C20  | C17  | C5   | 123.5(9)  |
| O18  | I12  | C4   | 94.4(2)    | C5   | C17  | C21  | 100.7(11) |
| C4   | I12  | O7   | 84.56(19)  | C23  | C17  | C20  | 114.9(9)  |
| O7   | S1   | C20  | 103.2(3)   | C23  | C17  | C21  | 98.2(10)  |
| O26  | S1   | O7   | 112.0(3)   | C23  | C17  | C5   | 104.9(10) |
| O26  | S1   | O6   | 114.2(3)   | C27  | C5   | C17  | 103.1(10) |
| O26  | S1   | C20  | 108.7(3)   | C19  | C23  | C17  | 98.3(9)   |
| O6   | S1   | O7   | 111.2(3)   | C19  | C23  | C11  | 118.0(12) |
| O6   | S1   | C20  | 106.8(4)   | C11  | C23  | C17  | 107.6(11) |
| S1   | O7   | I12  | 125.8(2)   | C3   | C23  | C19  | 112.8(12) |
| C8   | C4   | I12  | 121.2(4)   | C3   | C23  | C17  | 117.1(13) |
| C8   | C4   | C24  | 120.8(5)   | C3   | C23  | C11  | 103.7(12) |
| C24  | C4   | I12  | 118.0(4)   | C21  | C9   | C19  | 99.9(10)  |
| C4   | C8   | C10  | 118.8(5)   | C5   | C27  | C19  | 103.5(10) |
| C8   | C10  | C14  | 121.9(5)   | C20  | C17A | C21A | 108.1(12) |
| C16  | C24  | C4   | 120.0(5)   | C20  | C17A | C5A  | 111.1(14) |
| C10  | C14  | C16  | 117.5(5)   | C21A | C17A | C5A  | 102.4(15) |
| C10  | C14  | C22  | 122.3(5)   | C23A | C17A | C20  | 132.6(15) |
| C16  | C14  | C22  | 120.0(5)   | C23A | C17A | C21A | 101.3(15) |
| C24  | C16  | C14  | 121.0(5)   | C23A | C17A | C5A  | 97.5(15)  |
| C14  | C22  | C2   | 107.5(5)   | O25A | C21A | C17A | 128.8(16) |
| C13  | C22  | C14  | 112.1(5)   | O25A | C21A | C9A  | 127.5(17) |
| C13  | C22  | C15  | 107.8(6)   | C9A  | C21A | C17A | 103.7(13) |
| C13  | C22  | C2   | 108.5(6)   | C21A | C9A  | C19A | 102.6(13) |
| C15  | C22  | C14  | 110.8(5)   | C27A | C19A | C9A  | 104.4(18) |
| C15  | C22  | C2   | 110.1(6)   | C23A | C19A | C9A  | 98.3(15)  |
| C17  | C20  | S1   | 114.1(6)   | C23A | C19A | C27A | 105.2(16) |
| C17A | C20  | S1   | 129.8(7)   | C27A | C5A  | C17A | 107.0(15) |
| C23  | C19  | C9   | 97.7(11)   | C5A  | C27A | C19A | 99.9(15)  |
| C23  | C19  | C27  | 105.7(10)  | C3A  | C23A | C11A | 103.6(18) |
| C27  | C19  | C9   | 106.2(11)  | C3A  | C23A | C19A | 99.0(19)  |
| O25  | C21  | C17  | 124.7(14)  | C17A | C23A | C3A  | 137(2)    |
| O25  | C21  | C9   | 128.9(13)  | C17A | C23A | C11A | 104.6(17) |

**Table 5 Bond Angles for HCIB**

| Atom | Atom | Atom | Angle/°   | Atom | Atom | Atom | Angle/°   |
|------|------|------|-----------|------|------|------|-----------|
| C9   | C21  | C17  | 105.7(10) | C17A | C23A | C19A | 102.0(14) |
| C20  | C17  | C21  | 110.9(10) | C19A | C23A | C11A | 108.4(18) |

**Table 6 Torsion Angles for HCIB**

| A   | B   | C    | D    | Angle/°    | A    | B    | C    | D    | Angle/°    |
|-----|-----|------|------|------------|------|------|------|------|------------|
| I12 | C4  | C8   | C10  | 179.9(4)   | C5   | C17  | C23  | C19  | -46.7(13)  |
| I12 | C4  | C24  | C16  | -179.7(5)  | C5   | C17  | C23  | C11  | 76.1(13)   |
| S1  | C20 | C17  | C21  | -132.6(10) | C5   | C17  | C23  | C3   | -167.7(13) |
| S1  | C20 | C17  | C5   | -13.2(12)  | C23  | C19  | C9   | C21  | 41.3(15)   |
| S1  | C20 | C17  | C23  | 117.2(10)  | C23  | C19  | C27  | C5   | -29.9(16)  |
| S1  | C20 | C17A | C21A | 158.7(12)  | C23  | C17  | C5   | C27  | 29.1(15)   |
| S1  | C20 | C17A | C5A  | -89.6(15)  | O25  | C21  | C17  | C20  | 22(3)      |
| S1  | C20 | C17A | C23A | 33(3)      | O25  | C21  | C17  | C5   | -111(2)    |
| O7  | S1  | C20  | C17  | 169.9(6)   | O25  | C21  | C17  | C23  | 142(2)     |
| O7  | S1  | C20  | C17A | -178.4(13) | O25  | C21  | C9   | C19  | -178(2)    |
| O26 | S1  | O7   | I12  | -8.2(4)    | C9   | C19  | C23  | C17  | -61.9(13)  |
| O26 | S1  | C20  | C17  | -71.1(7)   | C9   | C19  | C23  | C11  | -176.9(12) |
| O26 | S1  | C20  | C17A | -59.3(14)  | C9   | C19  | C23  | C3   | 62.2(14)   |
| C4  | C8  | C10  | C14  | 0.6(9)     | C9   | C19  | C27  | C5   | 73.2(14)   |
| C4  | C24 | C16  | C14  | -1.2(10)   | C9   | C21  | C17  | C20  | -149.7(13) |
| O6  | S1  | O7   | I12  | -137.3(3)  | C9   | C21  | C17  | C5   | 78.0(15)   |
| O6  | S1  | C20  | C17  | 52.6(6)    | C9   | C21  | C17  | C23  | -29.0(17)  |
| O6  | S1  | C20  | C17A | 64.3(14)   | C27  | C19  | C23  | C17  | 47.4(13)   |
| C8  | C4  | C24  | C16  | -1.2(9)    | C27  | C19  | C23  | C11  | -67.6(14)  |
| C8  | C10 | C14  | C16  | -2.8(9)    | C27  | C19  | C23  | C3   | 171.5(13)  |
| C8  | C10 | C14  | C22  | -177.6(5)  | C27  | C19  | C9   | C21  | -67.7(15)  |
| C10 | C14 | C16  | C24  | 3.1(9)     | C17A | C21A | C9A  | C19A | -1(3)      |
| C10 | C14 | C22  | C13  | -24.7(8)   | C17A | C5A  | C27A | C19A | -3(2)      |
| C10 | C14 | C22  | C15  | -145.2(6)  | O25A | C21A | C9A  | C19A | 177(3)     |
| C10 | C14 | C22  | C2   | 94.5(7)    | C21A | C17A | C5A  | C27A | -70(2)     |
| C24 | C4  | C8   | C10  | 1.5(9)     | C21A | C17A | C23A | C3A  | -63(3)     |
| C16 | C14 | C22  | C13  | 160.6(6)   | C21A | C17A | C23A | C11A | 167.5(18)  |
| C16 | C14 | C22  | C15  | 40.1(8)    | C21A | C17A | C23A | C19A | 55(2)      |
| C16 | C14 | C22  | C2   | -80.2(7)   | C21A | C9A  | C19A | C27A | -76(2)     |
| C22 | C14 | C16  | C24  | 178.0(6)   | C21A | C9A  | C19A | C23A | 32(2)      |
| C20 | S1  | O7   | I12  | 108.5(4)   | C9A  | C19A | C27A | C5A  | 75.4(19)   |
| C20 | C17 | C5   | C27  | 163.4(11)  | C9A  | C19A | C23A | C3A  | 88(2)      |

**Table 6 Torsion Angles for HCIB**

| A   | B    | C    | D    | Angle/°    | A    | B    | C    | D    | Angle/°    |
|-----|------|------|------|------------|------|------|------|------|------------|
| C20 | C17  | C23  | C19  | 174.4(9)   | C9A  | C19A | C23A | C11A | -164.5(18) |
| C20 | C17  | C23  | C11  | -62.7(14)  | C9A  | C19A | C23A | C17A | -55(2)     |
| C20 | C17  | C23  | C3   | 53.4(16)   | C5A  | C17A | C21A | O25A | -110(3)    |
| C20 | C17A | C21A | O25A | 7(3)       | C5A  | C17A | C21A | C9A  | 68(2)      |
| C20 | C17A | C21A | C9A  | -174.1(19) | C5A  | C17A | C23A | C3A  | -167(3)    |
| C20 | C17A | C5A  | C27A | 174.8(16)  | C5A  | C17A | C23A | C11A | 63.1(19)   |
| C20 | C17A | C23A | C3A  | 65(4)      | C5A  | C17A | C23A | C19A | -49.7(18)  |
| C20 | C17A | C23A | C11A | -65(3)     | C27A | C19A | C23A | C3A  | -164.7(19) |
| C20 | C17A | C23A | C19A | -178(2)    | C27A | C19A | C23A | C11A | -57(2)     |
| C21 | C17  | C5   | C27  | -72.5(13)  | C27A | C19A | C23A | C17A | 53(2)      |
| C21 | C17  | C23  | C19  | 56.7(13)   | C23A | C17A | C21A | O25A | 149(3)     |
| C21 | C17  | C23  | C11  | 179.6(12)  | C23A | C17A | C21A | C9A  | -32(2)     |
| C21 | C17  | C23  | C3   | -64.2(15)  | C23A | C17A | C5A  | C27A | 33(2)      |
| C17 | C21  | C9   | C19  | -6.9(17)   | C23A | C19A | C27A | C5A  | -28(2)     |
| C17 | C5   | C27  | C19  | 0.3(16)    |      |      |      |      |            |

**Table 7 Hydrogen Atom Coordinates ( $\text{\AA} \times 10^4$ ) and Isotropic Displacement Parameters ( $\text{\AA}^2 \times 10^3$ ) for HCIB**

| Atom | x        | y        | z       | U(eq) |
|------|----------|----------|---------|-------|
| H8   | 5290.66  | 8111.8   | 3282.79 | 55    |
| H10  | 6210.88  | 10147.12 | 4050.31 | 55    |
| H24  | 5635.33  | 4128.25  | 4650.07 | 61    |
| H16  | 6538.55  | 6163.72  | 5413.86 | 61    |
| H13A | 7947.97  | 10812.23 | 4817.68 | 109   |
| H13B | 7881.63  | 12149.01 | 5383.18 | 109   |
| H13C | 7032.33  | 12028.93 | 4743.27 | 109   |
| H20A | 7484.36  | 5389.55  | 3808.84 | 79    |
| H20B | 7889.67  | 3345.6   | 3810.01 | 79    |
| H20C | 7410.4   | 5110.86  | 3841.35 | 79    |
| H20D | 7921.85  | 3268.8   | 3750.78 | 79    |
| H15A | 7652.03  | 7680.36  | 6017.64 | 120   |
| H15B | 8250.72  | 9546.1   | 6150.33 | 120   |
| H15C | 8330.29  | 8169.32  | 5598.45 | 120   |
| H2A  | 5904.32  | 11214.67 | 5375.43 | 117   |
| H2B  | 6760.78  | 11483.47 | 6004.39 | 117   |
| H2C  | 6173.17  | 9603.72  | 5896.61 | 117   |
| H19  | 10036.92 | 8653.63  | 3492.5  | 94    |

**Table 7 Hydrogen Atom Coordinates ( $\text{\AA}\times 10^4$ ) and Isotropic Displacement Parameters ( $\text{\AA}^2\times 10^3$ ) for HCIB**

| Atom | <i>x</i> | <i>y</i> | <i>z</i> | U(eq)  |
|------|----------|----------|----------|--------|
| H11A | 8190.63  | 9749.7   | 3408.84  | 131    |
| H11B | 7487.83  | 8054.13  | 3357.2   | 131    |
| H11C | 7962.47  | 8407.53  | 2803.62  | 131    |
| H5A  | 8937.54  | 3964.46  | 2570.59  | 97     |
| H5B  | 8156.36  | 5547.22  | 2331.32  | 97     |
| H3A  | 9427.82  | 6762.6   | 4543.07  | 168    |
| H3B  | 8384.67  | 7531.66  | 4372.46  | 168    |
| H3C  | 9222.81  | 8905.42  | 4379.52  | 168    |
| H9A  | 10854.28 | 5265.52  | 3749.18  | 129    |
| H9B  | 10564.66 | 6125.28  | 4343.91  | 129    |
| H27A | 9266.53  | 7629.51  | 2383.7   | 120    |
| H27B | 10047.22 | 6045.15  | 2619.38  | 120    |
| H3AA | 8709.89  | 9562.68  | 2785.62  | 214    |
| H3AB | 8818.81  | 9777.55  | 3528.84  | 214    |
| H3AC | 7841.38  | 9160.74  | 3048.37  | 214    |
| H11D | 7986.55  | 6580.65  | 2309.14  | 194    |
| H11E | 8766.54  | 5036.74  | 2576.08  | 194    |
| H11F | 9050     | 7002.99  | 2354.91  | 194    |
| H9AA | 10432.25 | 7144.3   | 4595.99  | 130    |
| H9AB | 9734.15  | 8886.86  | 4408.55  | 130    |
| H19A | 10118.06 | 8448.71  | 3370.35  | 134    |
| H5AA | 9683.33  | 3293.31  | 3877.1   | 118    |
| H5AB | 9283.29  | 3446.51  | 3115.35  | 118    |
| H27C | 10468.01 | 5226.5   | 3106.49  | 140    |
| H27D | 10843.27 | 5153.16  | 3875.33  | 140    |
| H18  | 3320(40) | 5870(50) | 3140(20) | 41(16) |

**Table 8 Atomic Occupancy for HCIB**

| Atom | Occupancy | Atom | Occupancy | Atom | Occupancy |
|------|-----------|------|-----------|------|-----------|
| H20A | 0.617(8)  | H20B | 0.617(8)  | H20C | 0.383(8)  |
| H20D | 0.383(8)  | C19  | 0.617(8)  | H19  | 0.617(8)  |
| C21  | 0.617(8)  | C17  | 0.617(8)  | C11  | 0.617(8)  |
| H11A | 0.617(8)  | H11B | 0.617(8)  | H11C | 0.617(8)  |
| C5   | 0.617(8)  | H5A  | 0.617(8)  | H5B  | 0.617(8)  |
| C23  | 0.617(8)  | C3   | 0.617(8)  | H3A  | 0.617(8)  |
| H3B  | 0.617(8)  | H3C  | 0.617(8)  | O25  | 0.617(8)  |



**Table 8 Atomic Occupancy for HCIB**

| <b>Atom</b> | <b><i>Occupancy</i></b> | <b>Atom</b> | <b><i>Occupancy</i></b> | <b>Atom</b> | <b><i>Occupancy</i></b> |
|-------------|-------------------------|-------------|-------------------------|-------------|-------------------------|
| C9          | 0.617(8)                | H9A         | 0.617(8)                | H9B         | 0.617(8)                |
| C27         | 0.617(8)                | H27A        | 0.617(8)                | H27B        | 0.617(8)                |
| C3A         | 0.383(8)                | H3AA        | 0.383(8)                | H3AB        | 0.383(8)                |
| H3AC        | 0.383(8)                | C11A        | 0.383(8)                | H11D        | 0.383(8)                |
| H11E        | 0.383(8)                | H11F        | 0.383(8)                | C17A        | 0.383(8)                |
| O25A        | 0.383(8)                | C21A        | 0.383(8)                | C9A         | 0.383(8)                |
| H9AA        | 0.383(8)                | H9AB        | 0.383(8)                | C19A        | 0.383(8)                |
| H19A        | 0.383(8)                | C5A         | 0.383(8)                | H5AA        | 0.383(8)                |
| H5AB        | 0.383(8)                | C27A        | 0.383(8)                | H27C        | 0.383(8)                |
| H27D        | 0.383(8)                | C23A        | 0.383(8)                |             |                         |
